# Supplementary material for: Measuring effective coverage of maternal and child health services in Cambodia: a retrospective analysis of Demographic and Health Surveys from 2005 to 2014
Source: PubMed Central journal article supplement — BMJ Open. 2022 Sep 7;12(9):e062028. doi: 10.1136/bmjopen-2022-062028 (PMC9454061; doi:10.1136/bmjopen-2022-062028), 2022-09-07
Supplement: bmjopen-2022-062028.draft_revisions.pdf [file bmjopen-2022-062028.draft_revisions.pdf]

# BMJ Open

BMJ Open is committed to open peer review. As part of this commitment we make the peer review history of every article we publish publicly available.

When an article is published we post the peer reviewers' comments and the authors' responses online. We also post the versions of the paper that were used during peer review. These are the versions that the peer review comments apply to.

The versions of the paper that follow are the versions that were submitted during the peer review process. They are not the versions of record or the final published versions. They should not be cited or distributed as the published version of this manuscript.

BMJ Open is an open access journal and the full, final, typeset and author-corrected version of record of the manuscript is available on our site with no access controls, subscription charges or pay-per-view fees (<http://bmjopen.bmj.com>).

If you have any questions on BMJ Open's open peer review process please email [info.bmjopen@bmj.com](mailto:info.bmjopen@bmj.com)

# BMJ Open

## Effective coverage of maternal and child health services in Cambodia from 2005 to 2014

|                               |                                                                                                                                                                                                                                                                                                                                                                               |
|-------------------------------|-------------------------------------------------------------------------------------------------------------------------------------------------------------------------------------------------------------------------------------------------------------------------------------------------------------------------------------------------------------------------------|
| Journal:                      | <i>BMJ Open</i>                                                                                                                                                                                                                                                                                                                                                               |
| Manuscript ID                 | bmjopen-2022-062028                                                                                                                                                                                                                                                                                                                                                           |
| Article Type:                 | Original research                                                                                                                                                                                                                                                                                                                                                             |
| Date Submitted by the Author: | 16-Feb-2022                                                                                                                                                                                                                                                                                                                                                                   |
| Complete List of Authors:     | Kim, Minkyung; Korea Foundation for International Healthcare<br>Kim, Soon Ae; Korea Foundation for International Healthcare<br>Oh, Juhwan; Seoul National University College of Medicine<br>Kim , Chae Eun; Korea Foundation for International Healthcare<br>Arsenault, C; Harvard University T H Chan School of Public Health,<br>Department of Global Health and Population |
| Keywords:                     | Health policy < HEALTH SERVICES ADMINISTRATION & MANAGEMENT,<br>Quality in health care < HEALTH SERVICES ADMINISTRATION &<br>MANAGEMENT, International health services < HEALTH SERVICES<br>ADMINISTRATION & MANAGEMENT                                                                                                                                                       |
|                               |                                                                                                                                                                                                                                                                                                                                                                               |

SCHOLARONE™  
Manuscripts

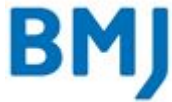

I, the Submitting Author has the right to grant and does grant on behalf of all authors of the Work (as defined in the below author licence), an exclusive licence and/or a non-exclusive licence for contributions from authors who are: i) UK Crown employees; ii) where BMJ has agreed a CC-BY licence shall apply, and/or iii) in accordance with the terms applicable for US Federal Government officers or employees acting as part of their official duties; on a worldwide, perpetual, irrevocable, royalty-free basis to BMJ Publishing Group Ltd ("BMJ") its licensees and where the relevant Journal is co-owned by BMJ to the co-owners of the Journal, to publish the Work in this journal and any other BMJ products and to exploit all rights, as set out in our [licence](#).

The Submitting Author accepts and understands that any supply made under these terms is made by BMJ to the Submitting Author unless you are acting as an employee on behalf of your employer or a postgraduate student of an affiliated institution which is paying any applicable article publishing charge ("APC") for Open Access articles. Where the Submitting Author wishes to make the Work available on an Open Access basis (and intends to pay the relevant APC), the terms of reuse of such Open Access shall be governed by a Creative Commons licence – details of these licences and which [Creative Commons](#) licence will apply to this Work are set out in our licence referred to above.

Other than as permitted in any relevant BMJ Author's Self Archiving Policies, I confirm this Work has not been accepted for publication elsewhere, is not being considered for publication elsewhere and does not duplicate material already published. I confirm all authors consent to publication of this Work and authorise the granting of this licence.

1  
2  
3  
4  
5  
6  
7 **Effective coverage of maternal and child health services in Cambodia from**  
8 **2005 to 2014**  
9

10  
11 **Min Kyung Kim<sup>1\*</sup>, Soon Ae Kim<sup>1\*</sup>, Juhwan Oh<sup>2</sup>, Chae Eun Kim<sup>1</sup>, Catherine Arsenault<sup>3</sup>**  
12  
13

14  
15 <sup>1</sup> Korea Foundation for International Healthcare (KOFIH), Seoul, Republic of Korea  
16

17 <sup>2</sup> Seoul National University College of Medicine, Seoul, Republic of Korea  
18

19 <sup>3</sup> Department of Global Health and Population, Harvard T.H. Chan School of Public Health,  
20 Boston, USA  
21

22 \*Co-first authors  
23  
24  
25  
26  
27  
28  
29  
30  
31  
32  
33  
34  
35

36 Corresponding author:

37 Min Kyung Kim

38 Korea Foundation for International (KOFIH), Seoul, Republic of Korea

39 mkkim213@gmail.com  
40  
41  
42  
43  
44  
45  
46  
47  
48  
49  
50  
51  
52  
53  
54  
55  
56  
57  
58  
59  
60

## Abstract

**Objective** To investigate effective, quality-adjusted, coverage and equity of maternal and child health (MCH) services to assess progress in improving quality of care in Cambodia.

**Design** A secondary statistical analysis using the three most recent (2005, 2010, 2014) Demographic and Health Surveys.

**Setting** Cambodia.

**Participants** 53155 women aged 15-49 years old and 23242 children under 5 years old across the three surveys.

**Outcome measures** We estimated crude coverage, effective coverage, and equity in effective coverage for five MCH services over time: antenatal care (ANC), facility delivery, and sick childcare for diarrhea, pneumonia, and fever. Quality was defined by the proportion of care seekers who received a set of interventions during health care visits. Effective coverage was estimated by combining crude coverage and quality. Equity was assessed using wealth quintiles, area of residence, and maternal education over time.

**Results** In 2014, average crude coverage was 80.1% (range 75.6% - 84.6%) for maternal care and 59.1% (range 55.5% - 61.3%) for sick child care. Average effective coverage was 56.4% (range 32.8% - 80.1%) for maternal health care and 29.6% (range 11.5% - 51.5%) for sick child care. Between 2005 and 2014, effective coverage improved for all five services, with the biggest increase (74%) for facility delivery. Effective coverage for curative sick child care – predominantly delivered by loosely regulated private health care providers – remains low. The poorest and less educated women experienced a greater improvement in effective coverage.

**Conclusions** Effective coverage has generally improved in Cambodia; however, most of the improvement was seen for maternal care. Substantial efforts remain to improve quality of curative sick child care. Policymakers should focus on improving effective coverage, and not only crude coverage, to achieve the health-related SDGs by 2030.

### Strengths and limitations of this study

- This study included nationally representative population data to estimate effective, quality-adjusted, coverage and equity of maternal and child health services.
- This study used three waves (2005, 2010, and 2014) of surveys to observe the temporal change in outcome variables.
- Since this study used cross-sectional data, the findings do not establish a cause and effect relationship.

## Introduction

Sustainable Development Goal (SDG) 3 aims to achieve universal health coverage (UHC), by ensuring access to quality essential health services by 2030.(1) Despite substantial improvement in access to healthcare services, quality of care remains poor and variable across low- and middle-income countries (LMICs).(2–5) The Lancet Global Health Commission on High Quality Health Systems in the SDG era (i.e., the HQSS Commission) estimated that high quality health systems could save one million newborn deaths annually.(4) Vulnerable groups, including the poor and the less educated, tend to receive worst quality of care.(5–7) Thus, quality improvement needs to be a central pillar of UHC.

An increasing body of evidence recommends a shift from tracking ‘crude’ or ‘contact’ coverage to ‘effective’ coverage,(5–8) defined as the proportion of a population in need of a service that resulted in a positive health outcome from the service.(9) Several studies have shown that effective coverage tends to be lower than crude coverage.(7,10,11) This indicates that many patients who come in contact with the health system are not treated according to standards of care.

Cambodia is a lower-middle income country located in Southeast Asia with a population of 16.72 million people.(12) Since the late 1990’s, the country has experienced consistent economic growth and a reduction in poverty rates.(13) In the past decades, the Cambodian government has focused on increasing utilization of maternal and child health (MCH) services. From 2000 to 2014, Cambodia reduced its under-5 mortality rate by two-thirds and the maternal mortality ratio by one-half.(14)

However, in order to achieve the health-related SDGs by 2030, maternal mortality must be reduced by an additional 60% and under-five mortality by an additional 30%. Using Global Burden of Disease data in 2016, Kruk et al found that deaths due to poor quality care were twice as high as deaths due to non-utilization of healthcare services in Cambodia.(15) To avert these additional maternal and child deaths, quality improvement is needed. The first step is to monitor progress during the MDG era.

To our knowledge, no study has assessed the effective, quality-adjusted, coverage of MCH services in Cambodia. Past research has mostly focused on the utilization of MCH services.(16–18) Thus, this study estimates the effective coverage of five MCH services and equity in effective coverage using data from 2005 to 2014.

## Methods

### *Data sources*

We used data from the Cambodia Demographic and Health Surveys (CDHS) to examine changes in crude coverage, effective coverage, and equity in effective coverage of maternal and child health services over time. The three most recent waves – 2005, 2010, 2014 - of CDHS were

1  
2  
3  
4 included. The CDHS is a nationally representative, population-based, cross-sectional survey  
5 carried out every 4 to 5 years.(14) Our population of interest included all women of reproductive  
6 age (15-49 years old) who had at least one birth in the past five years preceding each survey  
7 wave, and children under five years old living in residential households. The CDHS collects data  
8 on a wide range of health services including across the MCH continuum of care. Sampling  
9 strategies and methodology have been described elsewhere.(19)  
10  
11

### 12 13 *Measures*

#### 14 *Crude coverage*

15  
16 Crude coverage was calculated by the proportion of women or children who needed health care  
17 (due to true or perceived needs) and who sought care at health facilities. We estimated crude  
18 coverage for five MCH services: antenatal care (ANC), delivery, and care for diarrhea,  
19 pneumonia, and fever. Antenatal care was defined as the proportion of women with at least one  
20 live birth in the five years preceding the survey who reported at least four ANC visits for their  
21 most recent birth. Delivery care was defined as the proportion of women who gave birth in the  
22 five years preceding the survey and who delivered at a health facility including all public and  
23 private facilities (excluding those who gave birth at home and undefined locations).  
24  
25  
26

27 Care for diarrhea, pneumonia, and fever were defined, respectively, as the proportion of children  
28 who had diarrhea, symptoms of pneumonia (a cough accompanied by short, rapid breathing and  
29 difficulty breathing as a result of a problem in the chest), or fever, in the two weeks preceding  
30 the survey for whom advice or treatment was sought from a health facility including all public  
31 and private facilities except pharmacies and traditional healers.  
32  
33

#### 34 *Effective coverage*

35  
36 Based on the calculation used by Arsenault et al(7) and Hategeka et al(6), we estimated effective  
37 coverage as:  
38

$$39 \quad EC = Q*U/N$$

40  
41 Where *EC* is effective coverage, *Q* is quality of MCH services, *U* is utilization of MCH services,  
42 and *N* is need for MCH services. Since the CDHS had only a few indicators to estimate the  
43 quality of services, the effective coverage estimates reported in this study should be considered  
44 an upper limit of the quality of MCH services.  
45

46 Quality indicators were identified based on four reports: the HQSS Commission's framework(4),  
47 the WHO recommendations on antenatal care for a positive pregnancy experience(20), the  
48 National Strategy for Reproductive and Sexual Health of Cambodia 2017-2020(21), and the  
49 WHO standards for improving the quality of care for children and young adolescents in health  
50 facilities.(22)  
51  
52

53 Quality-adjusted ANC was estimated by the proportion of women who received at least four  
54 ANC visits and reported receiving five basic services at any point during ANC: their blood  
55 pressure was measured, a urine and a blood sample was collected, they were give or bough iron  
56  
57  
58  
59  
60

1  
2  
3  
4 tablets or syrup, and they were counseled on potential complications to look out for during  
5 pregnancy. Quality-adjusted delivery care was defined as the proportion of women who  
6 delivered at a health facility and who reported that someone examined them or asked questions  
7 about their health before being discharged.  
8  
9

10 Quality-adjusted care for diarrhea was defined as the proportion of children who sought care at a  
11 health facility for diarrhea and who received oral rehydration therapy (ORT) from a special  
12 packet, pre-packaged or from a homemade fluid. Quality-adjusted care for pneumonia was  
13 defined as the proportion of children who visited a health facility for suspected pneumonia and  
14 who received antibiotics (pills, syrup or injection). Quality-adjusted care for fever was defined as  
15 children who sought care at a health facility and received a blood test for suspected malaria.  
16  
17

### 18 *Equity in effective coverage*

19  
20 Equity in effective coverage of five MCH services was assessed according to household wealth  
21 quintile, area of residence (urban vs. rural) and the woman's education level as provided by the  
22 CDHS. The wealth index is calculated based on a household's ownership of selected assets, such  
23 as televisions and bicycles; housing construction materials; and types of water access and  
24 sanitation facilities.<sup>(23)</sup> The wealth index is divided into five quintiles (lowest – Q1, second –  
25 Q2, middle – Q3, fourth –Q4, and highest – Q5) based on a continuous scale of relative wealth in  
26 the country.<sup>(23)</sup> The women's education was combined into three levels (no education, primary,  
27 and secondary or higher).  
28  
29  
30

### 31 *Statistical analysis*

32  
33 We estimated crude coverage, effective coverage, and equity in effective coverage for the five  
34 MCH services in 2005, 2010 and 2014. Data for child pneumonia care was not available in 2005.  
35  
36

37 Two additional analyses were conducted. First, we estimated the crude and effective coverage in  
38 2000 to observe the trend in the last two decades. However, due to the age of the data, we  
39 excluded the 2000 data from the main analysis (**supplemental table 1**). Second, we used  
40 postpartum checkup after discharge to estimate effective coverage for childbirth and compare  
41 with the results from the main analysis (**supplemental table 2 and supplemental figure 1**).  
42  
43

44 All analyses were adjusted for the survey design (clustering, stratification, and survey weights)  
45 except the equiplots due to a limitation of the statistical software package. Stata SE Version 16.0  
46 was used for all analyses.  
47  
48

### 49 **Patient and public involvement**

50 Patients and/or the public were not involved in the design, or conduct, or reporting, or  
51 dissemination plans of this research.  
52  
53  
54  
55  
56  
57  
58  
59  
60



## Results

### *Description of the study population*

A total of 53,155 women of reproductive age (15-49 years old) were included across the three survey waves. The proportion of women who gave birth within the 5 years preceding the survey slightly decreased from 34.9% in 2005 to 34.0% in 2014. Most women lived in rural areas and completed primary education (**table 1**). In total, 23,242 children under 5 years were included. Fever was the most prevalent child illness, with 27.1% of children suffering from fever in the two weeks prior to the survey in 2014 (**table 1**).

### *Overall crude and effective coverage*

In 2014, average crude and effective coverage were 80.1% and 56.4%, respectively, for maternal health care (ANC and delivery), and 59.1% and 29.6% for sick child care (care for child diarrhea, pneumonia, and fever) (**table 1**). For maternal health care, effective coverage increased by 21.0% and 22.8% from 2005 to 2010 and 2010 to 2014, respectively (**table 1**). For sick childcare, effective coverage increased by 13.4% and 4.5% from 2005 to 2010 and 2010 to 2014, respectively (**table 1**). Estimates for crude and effective coverage for each indicator can be found in **supplemental table 1**. Delivery had the highest effective coverage at 80.1% in 2014 (**supplemental table 1**). Meanwhile, fever for sick child health service showed the lowest effective coverage at 2.3% in 2005 (**supplemental table 1**).

### *Maternal health care*

**Figure 1** shows a continuous increase in crude and effective coverage for ANC and facility delivery from 2005 to 2014. In 2014, 80.1% of women who delivered at a facility had a postnatal check before getting discharged and around half of women who had four ANC visits received the five basic services during their pregnancy. Effective coverage was improved across the wealth quintile, area of residence, and women's education level for both maternal health care services. Few women (4.7%) in the lowest wealth quintile received a postnatal check in 2005; however, 60.9% of them received the same service in 2014 (**figure 2**). The proportion of women from rural areas who received the five basic services during ANC increased by 13-folds from 2005 to 2014, from 2.2% to 29.6% (**figure 2**).

### *Sick child care*

**Figure 3** shows the trend in crude and effective coverage for the three sick child health services. Overall, crude and effective coverage for sick child care did not improve as much as for maternal care. The proportion of children with diarrhea who received ORS and the proportion with fever who received a malaria test almost remained the same from 2010 to 2014 (**figure 3**). The inequity gap in women's education level was narrowed for suspected pneumonia from 2010 to 2014 (**figure 4**). The proportion of children who received oral solutions for diarrhea was greater in rural compared to urban areas in 2014 (**figure 4**). Inequity gap in wealth quintile and education level for diarrhea and pneumonia appeared to be reversed in 2014 compared to previous years (**figure 4**).

**Table 1** - Characteristics of the study sample in Cambodia from 2005 to 2014.

| Survey, year                                                                    | 2005                  | 2010                  | 2014                  |
|---------------------------------------------------------------------------------|-----------------------|-----------------------|-----------------------|
|                                                                                 | N (%)                 | N (%)                 | N (%)                 |
| <b>Number of households</b>                                                     | 14243                 | 15667                 | 15825                 |
| <b>Women (age 15-49)</b>                                                        | 16823                 | 18754                 | 17578                 |
| Women who gave birth within 5 years of the survey                               | 5865 (34.9%)          | 6472 (34.5%)          | 5973 (34.0%)          |
| <b>Residence</b>                                                                |                       |                       |                       |
| Urban                                                                           | 2973 (17.7%)          | 3936 (21.0%)          | 3251 (18.5%)          |
| Rural                                                                           | 13851 (82.3%)         | 14819 (79.0%)         | 14328 (81.5%)         |
| <b>Education</b>                                                                |                       |                       |                       |
| No education                                                                    | 3270 (19.4%)          | 2974 (15.9%)          | 2251 (12.8%)          |
| Primary                                                                         | 9389 (55.8%)          | 9265 (49.4%)          | 8281 (47.1%)          |
| Secondary and higher                                                            | 4165 (24.8%)          | 6516 (34.7%)          | 7047 (40.1%)          |
| <b>Wealth quintile</b>                                                          |                       |                       |                       |
| Lowest                                                                          | 3018 (17.9%)          | 3389 (18.1%)          | 3144 (17.9%)          |
| Second                                                                          | 3165 (18.8%)          | 3517 (18.7%)          | 3314 (18.9%)          |
| Middle                                                                          | 3246 (19.3%)          | 3595 (19.2%)          | 3381 (19.2%)          |
| Fourth                                                                          | 3308 (19.7%)          | 3827 (20.4%)          | 3613 (20.6%)          |
| Highest                                                                         | 4089 (24.3%)          | 4429 (23.6%)          | 4128 (23.5%)          |
| <b>Maternal health care</b>                                                     |                       |                       |                       |
| Crude coverage of antenatal care and facility delivery (mean, range)            | 25.1% (23.2%-27.0%)   | 58.1% (56.8% – 59.4%) | 80.1% (75.6% – 84.6%) |
| Effective coverage of antenatal care and facility delivery (mean, range)        | 12.6% (4.7% – 20.5%)  | 33.6% (16.2% – 51.1%) | 56.4% (32.8% – 80.1%) |
| <b>Children (age &lt;5)</b>                                                     | 7789                  | 8200                  | 7253                  |
| Children who had diarrhea 2 weeks prior to the survey                           | 1420 (18.2%)          | 1161 (14.2%)          | 902 (12.4%)           |
| Children who had pneumonia 2 weeks prior to the survey                          | 2224 (28.6%)          | 1741 (21.2%)          | 1531 (21.1%)          |
| Children who had fever 2 weeks prior to the survey                              | 2576 (33.1%)          | 2194 (26.8%)          | 1968 (27.1%)          |
| <b>Care for sick children</b>                                                   |                       |                       |                       |
| Crude coverage of diarrhea, pneumonia, and fever (mean, range)                  | 45.3% (41.1% – 47.8%) | 69.1% (58.9% – 75.5%) | 59.1% (55.5% – 61.3%) |
| Effective coverage of diarrhea, pneumonia, and fever (mean, range) <sup>a</sup> | 11.7% (2.3% – 21.1%)  | 25.1% (10.3% – 37.3%) | 29.6% (11.5% – 51.5%) |

<sup>a</sup>Effective coverage for pneumonia in 2005 was not included due to missing data in CDHS.

## Discussion

In this study, we estimated crude coverage, effective coverage, and equity in effective coverage for five MCH services to assess progress in improving quality of health care in Cambodia from 2005 to 2014. We found that improvements in effective coverage were greater for maternal health services (ANC and facility delivery), than for curative services for sick children (diarrhea, pneumonia, and fever). Vulnerable women, including the poor, rural residents, and less educated, experienced a greater improvement in effective coverage for facility delivery than ANC. Inequity gaps appeared to have been reversed for diarrhea and pneumonia over time, where children from rural households received higher quality care than children from urban households.

Effective coverage improved for all five MCH services from 2005 to 2014, but improvements were greater for maternal health than for curative care for children. We also found a reverse inequity gap for sick child care – children from the poorest, less educated households and from rural areas, appeared to be more likely to receive ORS for diarrhea and antibiotics for pneumonia than children from richer, more educated households and urban residents. Most curative care is delivered by an extensive network of loosely regulated private health-care providers in Cambodia while the public sector is the predominant provider of preventive care and health promotion activities.(13,24) According to the 2014 CHDS, 65% of care for child diarrhea, fever or cough took place in the private sector.(14) Private providers – mostly small practices, pharmacies or single-person practitioners - are also more prevalent in urban areas.(13) The regulation of private providers in Cambodia remains a challenge where many operate without government accreditation.(13) Our results indicate that the quality gaps may be largest in the private sector in Cambodia.

The increase in care seeking among poorer households could also have been influenced by the Health Equity Fund (HEF). The HEF, launched in 2000, is Cambodia's largest financial protection scheme, covering the poorest one-fifth of the national population and aims to increase access to government health facilities.(25) Since then, the utilization of maternal and child health services significantly increased among HEF-supported patients, particularly the facility deliveries.(14,26) Yet, only 1 in 2 children received proper treatments at facilities. Only half of women received all five basic health services during their ANC visits.

From 2005 to 2014, the proportion of women who delivered at health facilities quadrupled. During the MDG era, several programs have focused on improving maternal and newborn health including those led by the national government and international aid agencies, including the Korea Foundation for International Healthcare (KOFIH). Since 2013, KOFIH has implemented an integrated MCH program to improve the quality, availability, and accessibility of maternal and child healthcare services in the Battambang province by training health care providers, supporting transportation for referral system and improving healthcare infrastructures, etc.(27) These programs may have been effective in improving both the utilization and quality of delivery care. In 2014, 69% of deliveries took place in the public sector and 85.8% of births were attended by a midwife or a doctor.(14) Nonetheless, we found a large gap in postpartum care before and after discharge which highlights missed opportunities for high-quality delivery care

1  
2  
3  
4 **(supplemental table 2 and supplemental figure 1)**. A meta-analysis found that receiving  
5 antenatal to postnatal care could reduce the risk of combined neonatal, perinatal, and maternal  
6 mortality by 15%.(28) The Cambodian Ministry of Health recommends four postnatal checks,  
7 one before and three after discharge.(21) Despite these recommendations, mothers rarely return  
8 to the facilities after they get discharged. Inadequate transportation and long distances to health  
9 facilities might discourage women to return to the facilities after getting discharged. More  
10 outreach efforts like home visits, promotion of postnatal care during the antenatal period and at  
11 delivery are needed to ensure a continuum of delivery care for both mothers and newborns.  
12  
13

14  
15 We found the largest difference (65.1%) between crude and effective coverage for children with  
16 fever in 2010. Effective coverage (blood test for suspected malaria) only improved by 1.1% from  
17 2010 to 2014. This small increase in coverage might have resulted in a dramatic reduction in  
18 malaria related deaths in Cambodia. In 2018, no malaria related deaths was reported for the first  
19 time in the country's history.(29) The percentage of malaria cases significantly fell from 61% in  
20 2015 to 27% in 2018.(29) This promising improvement could have reduced the number of blood  
21 tests for suspected malaria cases.  
22  
23

24 Effective coverage lags behind crude coverage in Cambodia, indicating a need for improving the  
25 quality of MCH care. Similar or even lower levels of effective coverage have been found in other  
26 countries. Across 91 LMICs, effective coverage for ANC ranged from 53.8% on average in low-  
27 income countries, to 93.3% in upper-middle-income countries.(7) In Rwanda, only 40.2% of  
28 women who gave birth in a facility in 2015 received a check-up before discharge while this  
29 estimate was almost the double (80.1%) in Cambodia.(6) Quality-adjusted coverage for ANC  
30 (women who had at least 4 ANC visits and received at least 11 quality focuses intervention  
31 items) was about a half in Myanmar (14.6%) compared to Cambodia (32.8%).(30) In Haiti, an  
32 average effective coverage for curative sick childcare, including taking history, testing, and  
33 managing care, was 11.8% in 2013 while this estimate was almost tripled (29.7%) in  
34 Cambodia.(10) Leslie et al found that effective coverage, providers' adherence to evidence-based  
35 care guidelines, for sick childcare was 37% in 8 LMICs between 2007 and 2015.(31)  
36  
37  
38  
39

40 This study includes several limitations. First, the quality measures are not inclusive as they  
41 included only a limited number of recommended items that should be completed during MCH  
42 services. For instance, effective coverage for childbirth included only one item: checkup before  
43 discharge. Many other components of care are required for high-quality delivery care included a  
44 positive user experience (respectful, patient-centered delivery care) and high-quality intrapartum  
45 technical care. In addition, quality for sick child care was measured by whether the child  
46 received an appropriate treatment (ORS for diarrhea, antibiotics for suspected pneumonia, and  
47 blood test for suspected malaria) but the survey did not ask whether the healthcare providers  
48 explained the proper treatment instructions to the caregivers or conveyed their diagnosis. Given  
49 these limited measures, our quality estimates should be regarded as an upper bound of quality, a  
50 starting point for estimating quality-adjusted coverage rather than a definite estimate. Thus,  
51 better quality measures - user experience, competent care, and timeliness of care - are needed.  
52 More studies need to go beyond utilization of care and investigate health system quality.  
53  
54  
55  
56  
57  
58  
59  
60

1  
2  
3  
4 Second, although we included the most recent CDHS surveys, our latest data points are from  
5 2014. The CDHS announced an upcoming 2020-21 survey. Future studies should estimate the  
6 effect of the COVID-19 pandemic on effective coverage in Cambodia.(32)  
7

8 Third, DHS data is self-reported by caregivers which is subject to recall bias. Women tend to  
9 report less accurately about care related to more complex diseases such as pneumonia (33) but  
10 they report better for more invasive procedures such as a blood test. (34) To address reporting  
11 biases, other studies on quality of care have linked household surveys with facility  
12 assessments.(35) In 2008, Cambodia implemented the Service Availability and Readiness  
13 Assessment (SARA), a national health facility assessment.(36) Future studies should try to link  
14 different types of surveys to provide a more comprehensive picture of health system quality in  
15 Cambodia.  
16  
17  
18  
19  
20

## 21 **Conclusion**

22 Despite the substantial improvement in maternal and child outcomes in the past decades in  
23 Cambodia, efforts are needed to improve quality of care. As Cambodia strives to meet the health-  
24 related SDGs by 2030, focusing on effective coverage will be important more than ever to  
25 address the residual maternal and child mortality. Our study also highlights the need for better  
26 regulation and quality improvement efforts among the private sector. To our knowledge, this is  
27 the first study providing sound evidence of the quality of care in Cambodia over time. Health  
28 system strengthening efforts need to go beyond just improving the utilization of care and start  
29 focusing on the content of care and patients' experience. The COVID-19 pandemic has shown  
30 the need for resilient, high-quality health systems more than ever. Thus, Cambodia needs to seize  
31 this moment to shift its attention and funding towards building a high-quality health system.  
32  
33  
34  
35  
36  
37

## 38 **Funding**

39 This study was supported by the Korea Foundation for International Healthcare. Award/Grant  
40 number: N/A  
41

## 42 **Competing interests**

43 The authors declare that they have no competing interests.  
44  
45

## 46 **Contributions**

47 MKK, SEK, CA were involved in the conceptualization and interpretation of findings and helped  
48 draft the manuscript. MKK and SAK conducted data analysis. JHW and CEK helped draft the  
49 manuscript.  
50  
51

## 52 **Patient consent for publication**

53 Not required  
54  
55  
56  
57  
58  
59  
60

1  
2  
3  
4 **Ethics approval**  
5

6 Since this study uses publicly available data, an ethical approval was not needed.  
7

8 **Data sharing statement**  
9

10 Data are available upon request and available online from [www.measuredhs.com](http://www.measuredhs.com)  
11  
12  
13  
14  
15  
16  
17  
18  
19  
20  
21  
22  
23  
24  
25  
26  
27  
28  
29  
30  
31  
32  
33  
34  
35  
36  
37  
38  
39  
40  
41  
42  
43  
44  
45  
46  
47  
48  
49  
50  
51  
52  
53  
54  
55  
56  
57  
58  
59  
60

For peer review only



## References

1. United Nations. The Sustainable Development Goals Report 2016 [Internet]. New York; 2016. Available from: [https://nacoesunidas.org/wp-content/uploads/2016/07/The\\_Sustainable\\_Development\\_Goals\\_Report\\_2016.pdf](https://nacoesunidas.org/wp-content/uploads/2016/07/The_Sustainable_Development_Goals_Report_2016.pdf)
2. Kruk ME, Chukwuma A, Mbaruku G, Leslie HH. Variation in quality of primary-care services in Kenya, Malawi, Namibia, Rwanda, Senegal, Uganda and the United Republic of Tanzania. *Bull World Health Organ*. 2017 Jun 1;95(6):408–18.
3. Kruk ME, Leslie HH, Verguet S, Mbaruku GM, Adanu RMK, Langer A. Quality of basic maternal care functions in health facilities of five African countries: an analysis of national health system surveys. *Lancet Glob Health*. 2016 Nov 1;4(11):e845–55.
4. Kruk ME, Gage AD, Arsenault C, Jordan K, Leslie HH, Roder-DeWan S, et al. High-quality health systems in the Sustainable Development Goals era: time for a revolution. *Lancet Glob Health*. 2018 Nov 1;6(11):e1196–252.
5. Gage AD, Leslie HH, Bitton A, Jerome JG, Thermidor R, Joseph JP, et al. Assessing the quality of primary care in Haiti. *Bull World Health Organ*. 2017 Mar 1;95(3):182–90.
6. Hategeka C, Arsenault C, Kruk ME. Temporal trends in coverage, quality and equity of maternal and child health services in Rwanda, 2000–2015. *BMJ Glob Health*. 2020 Nov 1;5(11):e002768.
7. Arsenault C, Jordan K, Lee D, Dinsa G, Manzi F, Marchant T, et al. Equity in antenatal care quality: an analysis of 91 national household surveys. *Lancet Glob Health*. 2018 Nov 1;6(11):e1186–95.
8. Nguyen PH, Khuong LQ, Pramanik P, Billah SM, Menon P, Piwoz E, et al. Effective coverage of nutrition interventions across the continuum of care in Bangladesh: insights from nationwide cross-sectional household and health facility surveys. *BMJ Open*. 2021 Jan 20;11(1):e040109.
9. Marsh AD, Muzigaba M, Diaz T, Requejo J, Jackson D, Chou D, et al. Effective coverage measurement in maternal, newborn, child, and adolescent health and nutrition: progress, future prospects, and implications for quality health systems. *Lancet Glob Health*. 2020 May 1;8(5):e730–6.
10. Leslie HH, Malata A, Ndiaye Y, Kruk ME. Effective coverage of primary care services in eight high-mortality countries. *BMJ Glob Health*. 2017;2(3):e000424.
11. Wang W, Mallick L, Allen C, Pullum T. Effective coverage of facility delivery in Bangladesh, Haiti, Malawi, Nepal, Senegal, and Tanzania. *PLOS ONE*. 2019 Jun 11;14(6):e0217853.
12. World Bank Group. World Bank Open Data | Data [Internet]. [cited 2022 Jan 3]. Available from: <https://data.worldbank.org/>
13. World Health Organization. Regional Office for the Western Pacific. The Kingdom of Cambodia health system review [Internet]. WHO Regional Office for the Western Pacific; 2015 [cited 2022 Jan 3]. xxxii, 178 p. Available from: <https://apps.who.int/iris/handle/10665/208213>
14. Statistics/Cambodia NI of, Health/Cambodia DG for, International ICF. Cambodia Demographic and Health Survey 2014. 2015 Sep 1 [cited 2021 Nov 5]; Available from: <https://dhsprogram.com/publications/publication-fr312-dhs-final-reports.cfm>

15. Kruk ME, Gage AD, Joseph NT, Danaei G, García-Saisó S, Salomon JA. Mortality due to low-quality health systems in the universal health coverage era: a systematic analysis of amenable deaths in 137 countries. *The Lancet* [Internet]. 2018 Sep [cited 2018 Sep 12]; Available from: <https://linkinghub.elsevier.com/retrieve/pii/S0140673618316684>
16. Wang W, Hong R. Levels and determinants of continuum of care for maternal and newborn health in Cambodia-evidence from a population-based survey. *BMC Pregnancy Childbirth*. 2015 Mar 19;15:62.
17. Chomat AM, Grundy J, Oum S, Bermudez OI. Determinants of utilisation of intrapartum obstetric care services in Cambodia, and gaps in coverage. *Glob Public Health*. 2011;6(8):890–905.
18. Chham S, Radovich E, Buffel V, Ir P, Wouters E. Determinants of the continuum of maternal health care in Cambodia: an analysis of the Cambodia demographic health survey 2014. *BMC Pregnancy Childbirth*. 2021 Jun 2;21(1):410.
19. Rutstein SO, Rojas G. *Guide to DHS Statistics*. :171.
20. World Health Organization. WHO recommendations on antenatal care for a positive pregnancy experience. 2016.
21. MoH/UNFPA. National Strategy for Reproductive and Sexual Health in Cambodia, 2017-2020 [Internet]. 2017 p. 64. Available from: <https://cambodia.unfpa.org/en/publications/national-strategy-reproductive-and-sexual-health-cambodia-2017-2020>
22. World Health Organization. Standards for improving the quality of care for children and young adolescents in health facilities. 2018.
23. USAID. Standard Recode Manual for DHS 6 [Internet]. MEASURE DHS/ICF International; 2013 [cited 2021 Nov 22]. Available from: <https://dhsprogram.com/publications/publication-dhsg4-dhs-questionnaires-and-manuals.cfm>
24. Arsenault C, Kim MK, Aryal A, Faye A, Joseph JP, Kassa M, et al. Hospital-provision of essential primary care in 56 countries: determinants and quality. *Bull World Health Organ*. 2020 Nov 1;98(11):735-746D.
25. Annear PL, Lee JT, Khim K, Ir P, Moscoe E, Jordanwood T, et al. Protecting the poor? Impact of the national health equity fund on utilization of government health services in Cambodia, 2006-2013. *BMJ Glob Health*. 2019 Nov 1;4(6):e001679.
26. Kaba MW, Baesel K, Poch B, Bun S, Cerceau S, Bury L, et al. IDPoor: a poverty identification programme that enables collaboration across sectors for maternal and child health in Cambodia. *BMJ*. 2018 Dec 7;363:k4698.
27. Lee H-Y, Heo J, Koh H. Effect of a comprehensive program on maternal and child healthcare service in Battambang, Cambodia: A multivariate difference-in-difference analysis. *J Glob Health Sci* [Internet]. 2019 May 27 [cited 2021 Dec 16];1(1). Available from: <https://doi.org/10.35500/jghs.2019.1.e2>
28. Kikuchi K, Ansah EK, Okawa S, Enameh Y, Yasuoka J, Nanishi K, et al. Effective Linkages of Continuum of Care for Improving Neonatal, Perinatal, and Maternal Mortality: A Systematic Review and Meta-Analysis. *PLOS ONE*. 2015 Sep 30;10(9):e0139288.
29. World Health Organization. World malaria report. Geneva; 2019.



- 1  
2  
3  
4 30. Okawa S, Win HH, Leslie HH, Nanishi K, Shibamura A, Aye PP, et al. Quality gap in maternal and  
5 newborn healthcare: a cross-sectional study in Myanmar. *BMJ Glob Health*. 2019 Mar 1;4(2):e001078.  
6  
7 31. Leslie HH, Sun Z, Kruk ME. Association between infrastructure and observed quality of care in 4  
8 healthcare services: A cross-sectional study of 4,300 facilities in 8 countries. *PLOS Med*. 2017 Dec  
9 12;14(12):e1002464.  
10  
11 32. The DHS Program - Cambodia: Standard DHS, 2021 [Internet]. [cited 2021 Nov 26]. Available from:  
12 <https://dhsprogram.com/methodology/survey/survey-display-558.cfm>  
13  
14 33. Hazir T, Begum K, El Arifeen S, Khan AM, Huque MH, Kazmi N, et al. Measuring coverage in MNCH: a  
15 prospective validation study in Pakistan and Bangladesh on measuring correct treatment of childhood  
16 pneumonia. *PLoS Med*. 2013;10(5):e1001422.  
17  
18 34. Stanton CK, Rawlins B, Drake M, dos Anjos M, Cantor D, Chongo L, et al. Measuring Coverage in  
19 MNCH: Testing the Validity of Women's Self-Report of Key Maternal and Newborn Health Interventions  
20 during the Peripartum Period in Mozambique. *PLoS ONE*. 2013 May 7;8(5):e60694.  
21  
22 35. Bryce J, Arnold F, Blanc A, Hancioglu A, Newby H, Requejo J, et al. Measuring Coverage in MNCH:  
23 New Findings, New Strategies, and Recommendations for Action. *PLOS Med*. 2013 May  
24 7;10(5):e1001423.  
25  
26 36. O'Neill K, Takane M, Sheffel A, Abou-Zahr C, Boerma T. Monitoring service delivery for universal  
27 health coverage: the Service Availability and Readiness Assessment. *Bull World Health Organ*. 2013 Dec  
28 1;91(12):923–31.  
29  
30  
31

### Figure Legend:

32  
33  
34 Figure 1 – Line graphs

35  
36 Figure 2 – Equiplots

37  
38 Figure 3 – Line graphs

39  
40 Figure 4 – Equiplots  
41  
42  
43  
44  
45  
46  
47  
48  
49  
50  
51  
52  
53  
54  
55  
56  
57  
58  
59  
60

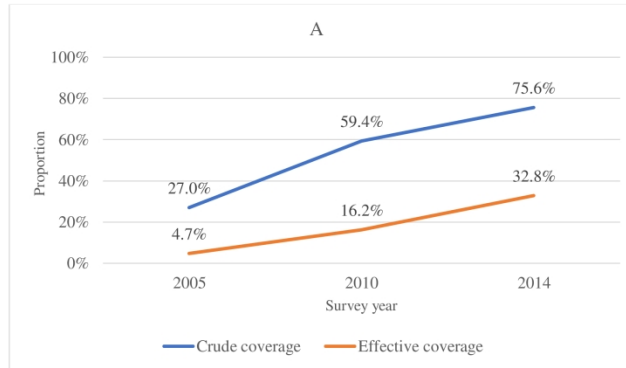

A. Antenatal care (at least four visits)

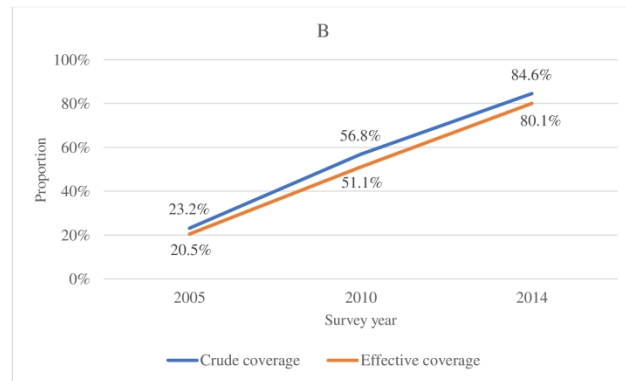

B. Facility delivery

**Figure 1.** Crude and effective coverage of maternal health care in Cambodia from 2005 to 2014. (A) at least 4 antenatal care (ANC) visits; (B) facility delivery.

Footnote: Effective coverage for antenatal care was estimated by the proportion of women who received at least four ANC visits and reported receiving five basic services at any point during ANC: their blood pressure was measured, a urine and a blood sample was collected, they were given or bought iron tablets or syrup, and they were counseled on potential complications to look out for during pregnancy. Effective coverage for facility delivery was defined as the proportion of women who delivered at a health facility and who reported that someone examined them or asked questions about their health before being discharged.

1

Figure 1 - Line graphs

215x279mm (300 x 300 DPI)

1  
2  
3  
4  
5  
6  
7  
8  
9  
10  
11  
12  
13  
14  
15  
16  
17  
18  
19  
20  
21  
22  
23  
24  
25  
26  
27  
28  
29  
30  
31  
32  
33  
34  
35  
36  
37  
38  
39  
40  
41  
42  
43  
44  
45  
46  
47  
48  
49  
50  
51  
52  
53  
54  
55  
56  
57  
58  
59  
60

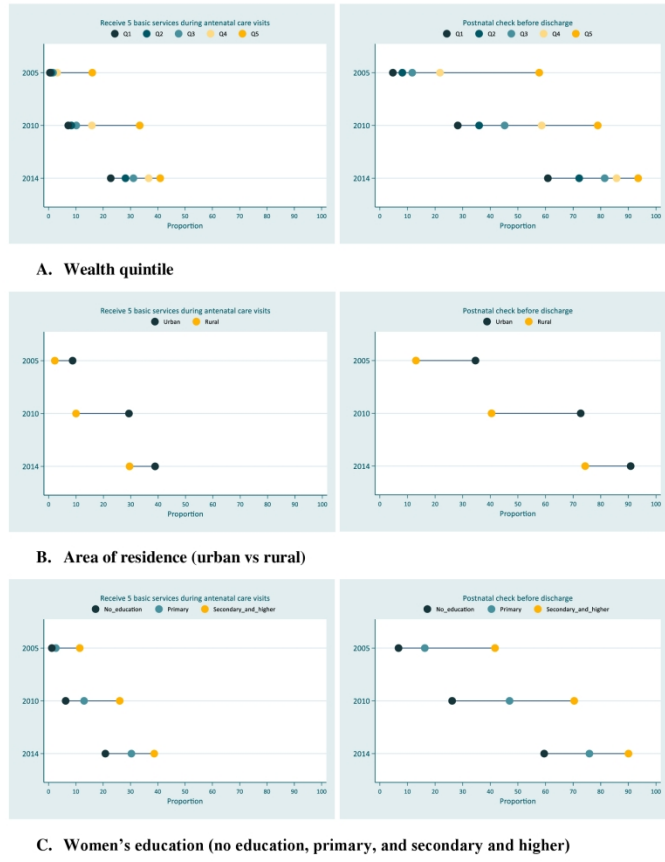

**Figure 2.** Equity in effective coverage of maternal health in Cambodia from 2005 to 2014 across 1) wealth quintile 2) area of residence (urban vs rural) 3) women's education (no education, primary, and secondary and higher)

1

Figure 2 - Equiplots

215x279mm (300 x 300 DPI)

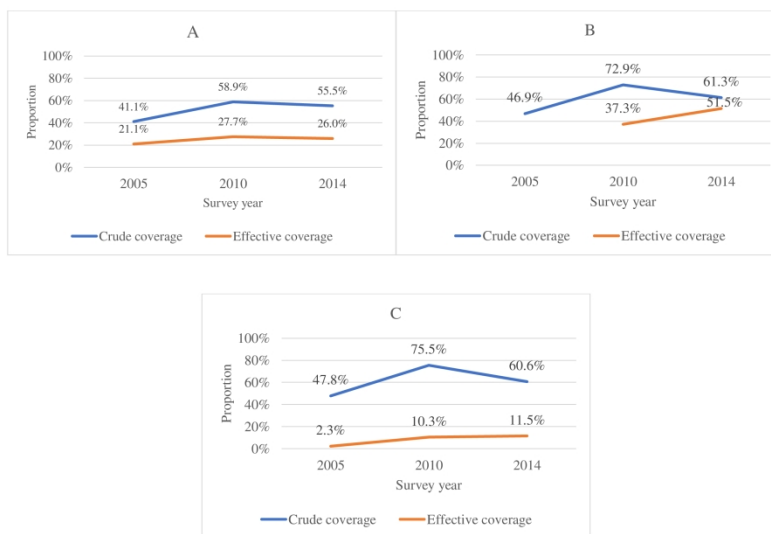

**Figure 3.** Crude and effective coverage of care for child health in Cambodia from 2005 to 2014. (A) diarrhea; (B) pneumonia; (C) fever.  
 Footnote: Data for effective coverage of pneumonia in 2005 were missing. Effective coverage for diarrhea was defined as the proportion of children who sought care at a health facility for diarrhea and who received oral rehydration therapy (ORT) from a special packet, pre-packaged or from a homemade fluid. Effective coverage for pneumonia was defined as the proportion of children who visited a health facility for pneumonia and who received antibiotics (pills, syrup, or injection). Effective coverage for fever was defined as children who sought care at a health facility and received a blood test for suspected malaria.

1

Figure 3 - Line graphs

279x215mm (300 x 300 DPI)

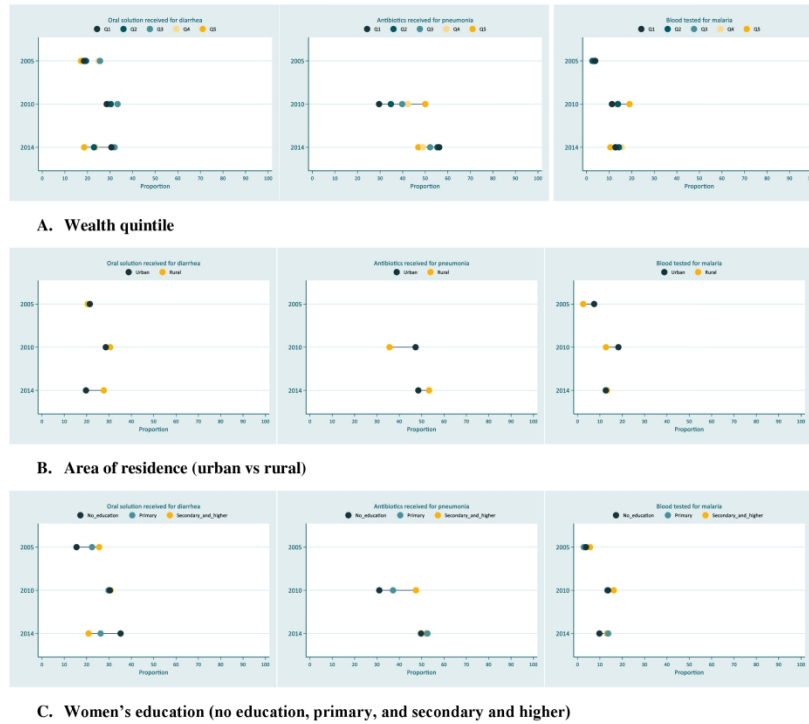

**Figure 4.** Equity in effective coverage of child health in Cambodia from 2005 to 2014 across 1) wealth quintile 2) area of residence (urban vs rural) 3) women's education (no education, primary, and secondary and higher).  
Footnote: Data for effective coverage of pneumonia in 2005 were missing.

1

Figure 4 - Equiplots

215x279mm (300 x 300 DPI)

## Supplementary file

### Effective coverage of maternal and child health in Cambodia from 2005 to 2014

Min Kyung Kim, Soon Ae Kim, Ju Hwan Oh, Chae Eun Kim, Catherine Arsenaault

**Supplemental table 1.** Crude and effective coverage of maternal and child health in Cambodia from 2000 to 2014.

| Survey, year             | 2000  |               | 2005  |               | 2010  |                | 2014  |               |
|--------------------------|-------|---------------|-------|---------------|-------|----------------|-------|---------------|
|                          | Mean  | (95% CI)      | Mean  | (95% CI)      | Mean  | (95% CI)       | Mean  | (95% CI)      |
| <b>Antenatal care</b>    |       |               |       |               |       |                |       |               |
| Crude coverage           | 8.9%  | (7.8 - 10.3)  | 27.0% | (24.7 - 29.5) | 59.4% | (57.0 - 61.7)  | 75.6% | (73.6 - 77.5) |
| Effective coverage       | 1.3%  | (1.0 - 1.9)   | 4.7%  | (3.7 - 6.0)   | 16.2% | (14.8 - 17.7)  | 32.8% | (30.8 - 34.9) |
| <b>Facility delivery</b> |       |               |       |               |       |                |       |               |
| Crude coverage           | 11.0% | (9.3 - 13.8)  | 23.2% | (20.5 - 26.1) | 56.8% | (54.1 - 59.4)  | 84.6% | (82.4 - 86.5) |
| Effective coverage       | --    | --            | 20.5% | (18.0 - 23.2) | 51.1% | (48.53 - 53.7) | 80.1% | (77.9 - 82.2) |
| <b>Diarrhea</b>          |       |               |       |               |       |                |       |               |
| Crude coverage           | 21.6% | (18.8 - 24.8) | 41.1% | (37.5 - 44.8) | 58.9% | (55.2 - 62.6)  | 55.5% | (50.9 - 60.0) |
| Effective coverage       | 7.8%  | (6.8 - 9.7)   | 21.1% | (18.3 - 24.1) | 27.7% | (24.3 - 31.3)  | 26.0% | (21.8 - 30.6) |
| <b>Pneumonia</b>         |       |               |       |               |       |                |       |               |
| Crude coverage           | 35.1% | (32.2 - 38.1) | 46.9% | (43.7 - 50.2) | 72.9% | (69.7 - 75.9)  | 61.3% | (57.4 - 65.0) |
| Effective coverage       | 30.4% | (27.7 - 33.2) | --    | --            | 37.3% | (34.0 - 40.8)  | 51.5% | (47.5 - 55.5) |
| <b>Fever</b>             |       |               |       |               |       |                |       |               |
| Crude coverage           | 34.1% | (31.4 - 36.9) | 47.8% | (44.6 - 51.1) | 75.5% | (72.6 - 78.1)  | 60.6% | (57.3 - 63.8) |
| Effective coverage       | --    | --            | 2.3%  | (1.7 - 3.1)   | 10.3% | (8.7 - 12.2)   | 11.5% | (9.5 - 13.9)  |

Note: -- Data are not available; effective coverage for facility delivery in 2000 and sick childcare for fever in 2000 and sick childcare for pneumonia in 2005.

1  
2  
3  
4  
5  
6  
7  
8  
9  
10  
11  
12  
13  
14  
15  
16  
17  
18  
19  
20  
21  
22  
23  
24  
25  
26  
27  
28  
29  
30  
31  
32  
33  
34  
35  
36  
37  
38  
39  
40  
41  
42  
43  
44  
45  
46  
47

**Supplemental table 2.** Crude and effective coverage of facility delivery (postnatal checkup after discharge) in Cambodia from 2005 to 2014

| Survey, year             | 2005  |               | 2010  |               | 2014  |               |
|--------------------------|-------|---------------|-------|---------------|-------|---------------|
|                          | Mean  | (95% CI)      | Mean  | (95% CI)      | Mean  | (95% CI)      |
| <b>Facility delivery</b> |       |               |       |               |       |               |
| Crude coverage           | 23.2% | (20.5 - 26.1) | 56.8% | (54.1 - 59.4) | 84.6% | (82.4 - 86.5) |
| Effective coverage       | 0.6%  | (0.4 - 0.9)   | 1.5%  | (1.1 - 2.0)   | 0.5%  | (0.3 - 0.8)   |

Note: Postnatal checkup after discharge is a question asked whether the mother was checked after getting discharge from the health facilities.

For peer review only

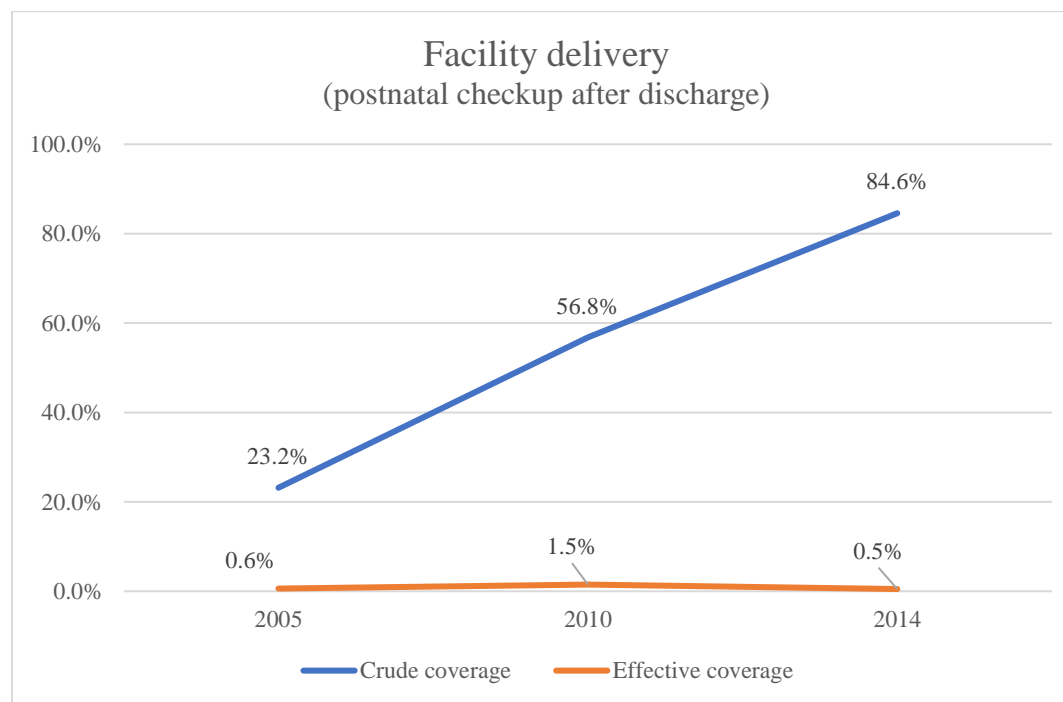

28  
29 **Supplemental figure 1.** Crude and effective coverage of facility delivery (postnatal checkup after discharge) in Cambodia from 2005  
30 to 2014.

31  
32 Note: Effective coverage for facility delivery was defined as the proportion of women who delivered at a health facility and who reported that someone examined  
33 them or asked questions about their health after being discharged.



# BMJ Open

## Measuring effective coverage of maternal and child health services in Cambodia: a retrospective analysis of Demographic and Health Surveys from 2005 to 2014

|                                 |                                                                                                                                                                                                                                                                                                                                                                               |
|---------------------------------|-------------------------------------------------------------------------------------------------------------------------------------------------------------------------------------------------------------------------------------------------------------------------------------------------------------------------------------------------------------------------------|
| Journal:                        | <i>BMJ Open</i>                                                                                                                                                                                                                                                                                                                                                               |
| Manuscript ID                   | bmjopen-2022-062028.R1                                                                                                                                                                                                                                                                                                                                                        |
| Article Type:                   | Original research                                                                                                                                                                                                                                                                                                                                                             |
| Date Submitted by the Author:   | 13-May-2022                                                                                                                                                                                                                                                                                                                                                                   |
| Complete List of Authors:       | Kim, Minkyung; Korea Foundation for International Healthcare<br>Kim, Soon Ae; Korea Foundation for International Healthcare<br>Oh, Juhwan; Seoul National University College of Medicine<br>Kim , Chae Eun; Korea Foundation for International Healthcare<br>Arsenault, C; Harvard University T H Chan School of Public Health,<br>Department of Global Health and Population |
| <b>Primary Subject Heading</b>: | Global health                                                                                                                                                                                                                                                                                                                                                                 |
| Secondary Subject Heading:      | Health policy, Health services research                                                                                                                                                                                                                                                                                                                                       |
| Keywords:                       | Health policy < HEALTH SERVICES ADMINISTRATION & MANAGEMENT,<br>Quality in health care < HEALTH SERVICES ADMINISTRATION &<br>MANAGEMENT, International health services < HEALTH SERVICES<br>ADMINISTRATION & MANAGEMENT                                                                                                                                                       |
|                                 |                                                                                                                                                                                                                                                                                                                                                                               |

SCHOLARONE™  
Manuscripts



I, the Submitting Author has the right to grant and does grant on behalf of all authors of the Work (as defined in the below author licence), an exclusive licence and/or a non-exclusive licence for contributions from authors who are: i) UK Crown employees; ii) where BMJ has agreed a CC-BY licence shall apply, and/or iii) in accordance with the terms applicable for US Federal Government officers or employees acting as part of their official duties; on a worldwide, perpetual, irrevocable, royalty-free basis to BMJ Publishing Group Ltd ("BMJ") its licensees and where the relevant Journal is co-owned by BMJ to the co-owners of the Journal, to publish the Work in this journal and any other BMJ products and to exploit all rights, as set out in our [licence](#).

The Submitting Author accepts and understands that any supply made under these terms is made by BMJ to the Submitting Author unless you are acting as an employee on behalf of your employer or a postgraduate student of an affiliated institution which is paying any applicable article publishing charge ("APC") for Open Access articles. Where the Submitting Author wishes to make the Work available on an Open Access basis (and intends to pay the relevant APC), the terms of reuse of such Open Access shall be governed by a Creative Commons licence – details of these licences and which [Creative Commons](#) licence will apply to this Work are set out in our licence referred to above.

Other than as permitted in any relevant BMJ Author's Self Archiving Policies, I confirm this Work has not been accepted for publication elsewhere, is not being considered for publication elsewhere and does not duplicate material already published. I confirm all authors consent to publication of this Work and authorise the granting of this licence.

1  
2  
3  
4  
5  
6  
7 **1 Measuring effective coverage of maternal and child health services in**  
8 **2 Cambodia: a retrospective analysis of Demographic and Health Surveys from**  
9 **3 2005 to 2014**  
10  
11  
12

13 **5 Min Kyung Kim<sup>1\*</sup>, Soon Ae Kim<sup>1\*</sup>, Juhwan Oh<sup>2</sup>, Chae Eun Kim<sup>1</sup>, Catherine Arsenaault<sup>3</sup>**  
14  
15  
16

17 <sup>1</sup> Korea Foundation for International Healthcare (KOFIH), Seoul, Republic of Korea  
18

19 <sup>2</sup> Seoul National University College of Medicine, Seoul, Republic of Korea  
20

21 <sup>3</sup> Department of Global Health and Population, Harvard T.H. Chan School of Public Health,  
22 Boston, USA  
23

24 \*Co-first authors  
25  
26  
27  
28  
29  
30  
31  
32  
33  
34  
35  
36  
37  
38  
39  
40  
41  
42  
43  
44  
45  
46  
47  
48  
49  
50  
51  
52  
53  
54  
55  
56  
57  
58  
59  
60

18 Corresponding author:

19 Min Kyung Kim

20 Korea Foundation for International (KOFIH), Seoul, Republic of Korea

21 mkkim213@gmail.com

## 27 **Abstract**

28 **Objective** To investigate effective, quality-adjusted, coverage and inequality of maternal and  
29 child health (MCH) services to assess progress in improving quality of care in Cambodia.

30 **Design** A retrospective secondary analysis using the three most recent (2005, 2010, 2014)  
31 Demographic and Health Surveys.

32 **Setting** Cambodia.

33 **Participants** 53155 women aged 15-49 years old and 23242 children under 5 years old across  
34 the three surveys.

35 **Outcome measures** We estimated crude coverage, effective coverage, and inequality in  
36 effective coverage for five MCH services over time: antenatal care (ANC), facility delivery, and  
37 sick childcare for diarrhea, pneumonia, and fever. Quality was defined by the proportion of care  
38 seekers who received a set of interventions during health care visits. Effective coverage was  
39 estimated by combining crude coverage and quality. We used equiplots and risk ratios, to assess  
40 patterns in inequality in MCH effective coverage across wealth quintile, urban-rural, and  
41 women's education levels and over time.

42 **Results** In 2014, crude and effective coverage were 80.1% and 56.4%, respectively for maternal  
43 health services (ANC and facility delivery) and 59.1% and 26.9%, respectively for sick  
44 childcare (diarrhea, pneumonia, and fever). Between 2005 and 2014, effective coverage  
45 improved for all services, but improvements were larger for maternal health care than for sick  
46 child care. In 2014, poorer children were more likely to receive ORS for diarrhea than children  
47 from richer households. Meanwhile, women from urban areas were more likely to receive a  
48 postnatal check before getting discharged.

49 **Conclusions** Effective coverage has generally improved in Cambodia but efforts remain to  
50 improve quality for all MCH services. Our results point to substantial gaps in curative care, a  
51 large share of which is provided by unregulated private providers in Cambodia. Policymakers  
52 should focus on improving effective coverage, and not only crude coverage, to achieve the  
53 health-related Sustainable Development Goals by 2030.

## 54 **Strengths and limitations of this study**

- 56 • This study included nationally representative population data to estimate effective,  
57 quality-adjusted, coverage and inequality of maternal and child health services.
- 58 • This study used three waves (2005, 2010, and 2014) of surveys to observe the temporal  
59 changes in coverage, quality, and inequality.
- 60 • The study is limited by the type of measures included in the Demographic and Health  
61 Surveys to assess quality.

## 62 Introduction

63 The sustainable Development Goal (SDG) 3 aims to achieve universal health coverage (UHC),  
64 by ensuring access to quality essential health services by 2030.(1) Despite substantial  
65 improvement in access to healthcare services, quality of care remains poor and variable across  
66 low- and middle-income countries (LMICs).(2–5) The Lancet Global Health Commission on  
67 High Quality Health Systems in the SDG era (i.e., the HQSS Commission) estimated that high  
68 quality health systems could save one million newborn deaths annually.(4) Vulnerable groups,  
69 including the poor and the less educated, tend to receive worst quality of care.(5–7) Thus, quality  
70 improvement needs to be a central pillar of UHC.

71 An increasing body of evidence recommends a shift from tracking ‘crude’ or ‘contact’ coverage  
72 to ‘effective’ coverage,(5–9) defined as the proportion of a population in need of a service that  
73 resulted in a positive health outcome from the service.(10) Recent literature have shown a gap  
74 between crude and effective coverage ranged from 40% to 60% in LMICs.(7,11,12) This  
75 indicates that many patients who come in contact with the health system are not treated  
76 according to standards of care.

77 Cambodia is a lower-middle income country located in Southeast Asia with a population of  
78 16.72 million people.(13) Since the late 1990’s, the country has experienced consistent economic  
79 growth and a reduction in poverty rates.(14) In the past decades, the Cambodian government has  
80 focused on increasing utilization of maternal and child health (MCH) services. From 2000 to  
81 2014, Cambodia reduced its under-5 mortality rate from 124 to 35 per 1,000 live births and the  
82 maternal mortality ratio from 437 to 170 per 100,000 live births.(15) Increased in facility  
83 deliveries and child vaccination programs have substantially reduced these maternal and child  
84 deaths during the Millennium Development Goals (MDGs) era.(16,17)

85 However, in order to achieve the health-related SDGs by 2030, maternal mortality must be  
86 reduced by an additional 60% and under-five mortality by an additional 30%. Using Global  
87 Burden of Disease data in 2016, Kruk et al found that deaths due to poor quality care were twice  
88 as high as deaths due to non-utilization of healthcare services in Cambodia.(18) Moreover,  
89 inequality in accessing maternal and child care services across geographic locations, urban-rural  
90 residents, and wealth quintile was observed in Cambodia.(19,20) To avert these additional  
91 maternal and child deaths, a high-quality equitable healthcare services is needed. The first step is  
92 to monitor progress during the MDG era.

93 To our knowledge, no study has assessed the effective, quality-adjusted, coverage of MCH  
94 services in Cambodia. Past research has mostly focused on the utilization of MCH services.(21–  
95 23) Thus, this study estimates the effective coverage of five MCH services and inequality in  
96 effective coverage using data from 2005 to 2014.

## 97 **Methods**

### 98 *Data sources*

99 This is a secondary statistical analysis using data from the Cambodia Demographic and Health  
100 Surveys (CDHS) to examine changes in crude coverage, effective coverage, and inequality in  
101 effective coverage of maternal and child health services over time. The three most recent waves  
102 – 2005, 2010, 2014 - of the CDHS were included. The CDHS is a nationally representative,  
103 population-based, cross-sectional survey carried out every 4 to 5 years.(15) Our population of  
104 interest (N) included all women of reproductive age (15-49 years old) who had at least one live  
105 birth in the past five years preceding each survey wave for maternal care, and all children under  
106 five years old living in residential households for sick childcare visits. The CDHS collects data  
107 on a wide range of health services including across the MCH continuum of care. Sampling  
108 strategies and methodology have been described elsewhere.(24)

### 109 *Measures*

#### 110 *Crude coverage*

111 Crude coverage was calculated by the proportion of women or children who needed health care  
112 (due to true or perceived needs) and who sought care at health facilities. We estimated crude  
113 coverage for five MCH services: antenatal care (ANC), delivery, and care for diarrhea,  
114 pneumonia, and fever. Antenatal care was defined as the proportion of women with at least one  
115 live birth in the five years preceding the survey who reported at least four ANC visits for their  
116 most recent birth. Delivery care was defined as the proportion of women who gave birth in the  
117 five years preceding the survey and who delivered at a health facility including all public and  
118 private facilities (excluding those who gave birth at home and undefined locations).

119 Care for diarrhea, pneumonia, and fever were defined, respectively, as the proportion of children  
120 who had diarrhea, symptoms of pneumonia (a cough accompanied by short, rapid breathing and  
121 difficulty breathing as a result of a problem in the chest), or fever, in the two weeks preceding  
122 the survey for whom advice or treatment was sought from a health facility including all public  
123 and private facilities except pharmacies and traditional healers.

#### 124 *Effective coverage*

125  
126 Based on the calculation used by Arsenault et al(7) and Hategeka et al(6), we estimated effective  
127 coverage as:

$$128 \quad EC = Q*U/N$$

129 Where *EC* is effective coverage, *Q* is quality of MCH services, *U* is utilization of MCH services,  
130 and *N* is need for MCH services. Since the CDHS had only a few indicators to estimate the  
131 quality of services, the effective coverage estimates reported in this study should be considered  
132 an upper limit of the quality of MCH services.

1  
2  
3  
4 133 Quality of care was defined based on four reports: the HQSS Commission's framework(4), the  
5 134 WHO recommendations on antenatal care for a positive pregnancy experience(25), the National  
6 135 Strategy for Reproductive and Sexual Health of Cambodia 2017-2020(26), and the WHO  
7 136 standards for improving the quality of care for children and young adolescents in health  
8 137 facilities.(27)

9  
10  
11 138 Quality-adjusted ANC was estimated by the proportion of women who received at least four  
12 139 ANC visits and reported receiving five basic services at any point during ANC: their blood  
13 140 pressure was measured, a urine and a blood sample were collected, they were given or bought  
14 141 iron tablets or syrup, and they were counseled on potential complications to look out for during  
15 142 pregnancy. Quality-adjusted delivery care was defined as the proportion of women who  
16 143 delivered at a health facility and who reported that someone examined them or asked questions  
17 144 about their health before being discharged. Quality-adjusted care for diarrhea was defined as the  
18 145 proportion of children who sought care at a health facility for diarrhea and who received oral  
19 146 rehydration therapy (ORT) from a special packet, pre-packaged or from a homemade fluid.  
20 147 Quality-adjusted care for pneumonia was defined as the proportion of children who visited a  
21 148 health facility for suspected pneumonia and who received antibiotics (pills, syrup or injection).  
22 149 Quality-adjusted care for fever was defined as children who sought care at a health facility and  
23 150 received a blood test for suspected malaria. Detailed indicator definitions are shown in  
24 151 **supplemental table 1.**

### 25 26 27 28 29 152 *Inequality in effective coverage of MCH services*

30 153 Inequalities in effective coverage of five MCH services was assessed using three measures of  
31 154 socioeconomic position: household wealth quintile, area of residence (urban vs. rural) and the  
32 155 woman's education level as provided by the CDHS.(15) The wealth index, provided by the  
33 156 CDHS, is calculated based on a household's ownership of selected assets, such as televisions and  
34 157 bicycles; housing construction materials; and types of water access and sanitation facilities.(28)  
35 158 The wealth index is divided into five quintiles (lowest – Q1, second – Q2, middle – Q3, fourth -  
36 159 Q4, and highest – Q5) based on a continuous scale of relative wealth in the country.(28) Details  
37 160 on the calculation of the wealth index can be found elsewhere.(29) The women's education was  
38 161 combined into three levels (no education, primary school only, and secondary or higher  
39 162 education).

### 40 41 42 43 44 163 *Statistical analysis*

45 164 We first used descriptive statistics to estimate crude coverage and effective coverage for the five  
46 165 MCH services in 2005, 2010 and 2014. Data for child pneumonia care was not available in 2005.  
47 166 Line graphs were used to present the trends in national averages over time for each health  
48 167 service. Second, we assessed inequalities in effective coverage visually using equiplots across  
49 168 wealth quintiles, maternal education, and area of residence (urban vs rural).

50  
51  
52 169 Three additional sub-analyses were conducted. First, we estimated the crude and effective  
53 170 coverage in 2000 to observe the trend in the last two decades. However, due to the age of the  
54 171 data, we excluded the 2000 data from the main analysis (**supplemental table 2**). Second, we



1  
2  
3  
4 172 used logistic regressions and postestimation commands to estimate risk ratios (RR) in effective  
5 173 coverage in 2014 between the top and bottom categories of each measure of socioeconomic  
6 174 position (wealth quintiles, education and urban residence) (**supplemental table 3**). Statistical  
7 175 code for RR calculation is publicly available on GitHub repository:  
8 176 [https://github.com/mkkim1/RiskRatio\\_Cambodia.git](https://github.com/mkkim1/RiskRatio_Cambodia.git). Third, we used postpartum checkup after  
9 177 discharge to estimate effective coverage for childbirth and compare with the results from the  
10 178 main analysis (**supplemental table 4 and supplemental figure 1**).

11  
12  
13  
14 179 All analyses, including logistic regressions, were adjusted for the survey design (clustering,  
15 180 stratification, and survey weights) except the equiplots due to a limitation of the statistical  
16 181 software package. Stata SE Version 16.0 was used for all analyses.

### 17 18 19 182 **Patient and public involvement**

20 183 Patients and/or the public were not involved in the design, or conduct, or reporting, or  
21 184 dissemination plans of this research.

22  
23  
24 185  
25  
26  
27  
28  
29  
30  
31  
32  
33  
34  
35  
36  
37  
38  
39  
40  
41  
42  
43  
44  
45  
46  
47  
48  
49  
50  
51  
52  
53  
54  
55  
56  
57  
58  
59  
60



## 186 **Results**

### 187 *Description of the study population*

188 A total of 53,155 women of reproductive age (15-49 years old) were included across the three  
189 survey waves. The proportion of women who gave birth within the 5 years preceding the survey  
190 slightly decreased from 34.9% in 2005 to 34.0% in 2014. Most women lived in rural areas and  
191 completed primary education (**table 1**). In total, 23,242 children under 5 years were included.  
192 Fever was the most prevalent child illness, with 27.1% of children suffering from fever in the  
193 two weeks prior to the survey in 2014 (**table 1**). High prevalence of fever could be explained by  
194 the high burden of malaria along the national borders including in the western provinces of  
195 Battambang and Pailin.

### 196 *Overall crude and effective coverage*

197 In 2014, average crude and effective coverage were 80.1% and 56.4%, respectively, for maternal  
198 health care (ANC and delivery), and 59.1% and 29.6% for sick child care (care for child  
199 diarrhea, pneumonia, and fever) (**table 1**). For maternal health, effective coverage increased by  
200 21.0% and 22.8% from 2005 to 2010 and 2010 to 2014, respectively (**table 1**). For sick  
201 childcare, effective coverage increased by 13.4% and 4.5% from 2005 to 2010 and 2010 to 2014,  
202 respectively (**table 1**). Estimates for crude and effective coverage for each indicator can be found  
203 in **supplemental table 2**. Delivery had the highest effective coverage at 80.1% in 2014  
204 (**supplemental table 2**). Meanwhile, effective coverage for fever had the lowest effective  
205 coverage at 2.3% in 2005 (**supplemental table 2**).

### 206 *Maternal health care*

207 **Figure 1** shows a continuous increase in crude and effective coverage for ANC and facility  
208 delivery from 2005 to 2014. In 2014, 80.1% of women who delivered at a facility had a postnatal  
209 check before being discharged and around half of women who had four ANC visits received the  
210 five basic services during their pregnancy. Effective coverage in maternal health care services  
211 improved even among the poorest. For example, in 2005 only 4.7% of women in the lowest  
212 wealth quintile received a postnatal check; while this increased to 60.9% in 2014 (**figure 2**). The  
213 proportion of women from rural areas who received the five basic services during ANC  
214 increased by 13-folds from 2005 to 2014, from 2.2% to 29.6% (**figure 2**). Inequalities also  
215 appeared to be reduced according to the equiplots. However, socioeconomic inequalities in  
216 effective coverage remained in 2014. Women in the richest wealth quintile in Cambodia were 1.7  
217 times more likely to receive all five services during ANC visits (RR = 1.7, 95% CI = 1.5, 2.0)  
218 compared to the poorest and they were 1.4 times more likely to receive a postnatal check before  
219 discharge (RR = 1.4, 95% CI = 1.4, 1.5) (**supplemental table 3**).

### 220 *Sick child care*

221 **Figure 3** shows the trend in crude and effective coverage for sick child care. Overall, crude and  
222 effective coverage for sick child care did not improve as much as for maternal care between 2005  
223 and 2014. The proportion of children with diarrhea who received ORS and the proportion with

1  
2  
3  
4 224 fever who received a malaria test remained almost the same between 2010 and 2014 (**figure 3**).  
5 225 The proportion of children who received ORS for diarrhea was higher in the poorest groups.  
6  
7 226 In 2014, children in the richest quintile were 0.6 times less likely to receive ORS when seeking  
8 227 care for diarrhea (RR = 0.6, 95% CI = 0.4, 0.9), compared to children from the poorest  
9 228 households (**figure 4 and supplemental table 3**). Similarly, children of most educated mothers  
10 229 were 0.5 times less likely to receive ORS for diarrhea (RR = 0.5, 95% CI = 0.3, 0.8) compared to  
11 230 those with no formal education (**supplemental table 3**).

12  
13  
14 231  
15  
16  
17  
18  
19  
20  
21  
22  
23  
24  
25  
26  
27  
28  
29  
30  
31  
32  
33  
34  
35  
36  
37  
38  
39  
40  
41  
42  
43  
44  
45  
46  
47  
48  
49  
50  
51  
52  
53  
54  
55  
56  
57  
58  
59  
60

For peer review only

**Table 1** - Characteristics of the study sample in Cambodia from 2005 to 2014.

| Survey, year                                                                    | 2005                  | 2010                  | 2014                  |
|---------------------------------------------------------------------------------|-----------------------|-----------------------|-----------------------|
|                                                                                 | N (%)                 | N (%)                 | N (%)                 |
| <b>Number of households</b>                                                     | 14243                 | 15667                 | 15825                 |
| <b>Women (age 15-49)</b>                                                        | 16823                 | 18754                 | 17578                 |
| Women who gave birth within 5 years of the survey                               | 5865 (34.9%)          | 6472 (34.5%)          | 5973 (34.0%)          |
| <b>Residence</b>                                                                |                       |                       |                       |
| Urban                                                                           | 2973 (17.7%)          | 3936 (21.0%)          | 3251 (18.5%)          |
| Rural                                                                           | 13851 (82.3%)         | 14819 (79.0%)         | 14328 (81.5%)         |
| <b>Education</b>                                                                |                       |                       |                       |
| No education                                                                    | 3270 (19.4%)          | 2974 (15.9%)          | 2251 (12.8%)          |
| Primary                                                                         | 9389 (55.8%)          | 9265 (49.4%)          | 8281 (47.1%)          |
| Secondary and higher                                                            | 4165 (24.8%)          | 6516 (34.7%)          | 7047 (40.1%)          |
| <b>Wealth quintile</b>                                                          |                       |                       |                       |
| Lowest                                                                          | 3018 (17.9%)          | 3389 (18.1%)          | 3144 (17.9%)          |
| Second                                                                          | 3165 (18.8%)          | 3517 (18.7%)          | 3314 (18.9%)          |
| Middle                                                                          | 3246 (19.3%)          | 3595 (19.2%)          | 3381 (19.2%)          |
| Fourth                                                                          | 3308 (19.7%)          | 3827 (20.4%)          | 3613 (20.6%)          |
| Highest                                                                         | 4089 (24.3%)          | 4429 (23.6%)          | 4128 (23.5%)          |
| <b>Maternal health care</b>                                                     |                       |                       |                       |
| Crude coverage of antenatal care and facility delivery (mean, range)            | 25.1% (23.2%-27.0%)   | 58.1% (56.8% – 59.4%) | 80.1% (75.6% – 84.6%) |
| Effective coverage of antenatal care and facility delivery (mean, range)        | 12.6% (4.7% – 20.5%)  | 33.6% (16.2% – 51.1%) | 56.4% (32.8% – 80.1%) |
| <b>Children (age &lt;5)</b>                                                     | 7789                  | 8200                  | 7253                  |
| Children who had diarrhea 2 weeks prior to the survey                           | 1420 (18.2%)          | 1161 (14.2%)          | 902 (12.4%)           |
| Children who had pneumonia 2 weeks prior to the survey                          | 2224 (28.6%)          | 1741 (21.2%)          | 1531 (21.1%)          |
| Children who had fever 2 weeks prior to the survey                              | 2576 (33.1%)          | 2194 (26.8%)          | 1968 (27.1%)          |
| <b>Care for sick children</b>                                                   |                       |                       |                       |
| Crude coverage of diarrhea, pneumonia, and fever (mean, range)                  | 45.3% (41.1% – 47.8%) | 69.1% (58.9% – 75.5%) | 59.1% (55.5% – 61.3%) |
| Effective coverage of diarrhea, pneumonia, and fever (mean, range) <sup>a</sup> | 11.7% (2.3% – 21.1%)  | 25.1% (10.3% – 37.3%) | 29.6% (11.5% – 51.5%) |

<sup>a</sup>Effective coverage for pneumonia in 2005 was not included due to missing data in CDHS.

## 233 Discussion

234 In this study, we estimated crude coverage, effective coverage, and inequality in effective  
235 coverage for five MCH services to assess progress in improving quality of health care in  
236 Cambodia from 2005 to 2014. We found that improvements in effective coverage were greater  
237 for maternal health services (ANC and facility delivery), than for curative services for sick  
238 children (diarrhea, pneumonia, and fever). Vulnerable women, including the poor, rural  
239 residents, and less educated, experienced a greater improvement in effective coverage for facility  
240 delivery than ANC. Inequality gaps appeared to have been reversed for diarrhea and pneumonia  
241 over time, where children from rural households received higher quality care than children from  
242 urban households.

243 Effective coverage in sick child care did not improve as much as for maternal health services.  
244 We also found a pro-poor distribution for sick child care – children from the poorest, less  
245 educated households and from rural areas, appeared to be more likely to receive ORS for  
246 diarrhea and antibiotics for pneumonia, than children from richer, more educated households and  
247 urban areas. Most curative care in Cambodia is delivered by an extensive network of loosely  
248 regulated private health-care providers while the public sector is the predominant provider of  
249 preventive care and health promotion activities.(14,30) According to the 2014 CDHS, 65% of  
250 care for child diarrhea, fever or cough took place in the private sector.(15) Private providers –  
251 mostly small practices, pharmacies or single-person practitioners - are also more prevalent in  
252 urban areas.(14) The regulation of private providers in Cambodia remains a challenge where  
253 many operate without government accreditation.(14) The Cambodia National Strategic Plan  
254 2017-2020 revealed inadequate education of health professionals as an important impediment to  
255 improving the quality of health services.(31) Since our results point to large quality gaps in the  
256 private sector, the Cambodian government should regulate private healthcare providers for their  
257 curative clinical practice to ensure that patients receive quality care.

258 The increase in care seeking among poorer households could also have been influenced by the  
259 Health Equity Fund (HEF). The HEF, launched in 2000, is Cambodia's largest financial  
260 protection scheme, covering the poorest one-fifth of the national population and aims to increase  
261 access to government health facilities.(32) Since then, the utilization of maternal and child health  
262 services significantly increased among HEF-supported patients, particularly the facility  
263 deliveries.(15,33) Yet, only 1 in 2 children received proper treatments at facilities. Only half of  
264 women received all five basic health services during their ANC visits.

265 From 2005 to 2014, the proportion of women who delivered at health facilities quadrupled.  
266 During the MDG era, several programs have focused on improving maternal and newborn health  
267 including those led by the national government and international aid agencies, including the  
268 Korea Foundation for International Healthcare (KOFIH). Since 2013, KOFIH has implemented  
269 an integrated MCH program to improve the quality of maternal and child healthcare services in  
270 the Battambang province by training healthcare workers - upgrading the skills of new midwives  
271 and training on partograph.(34) The Government Midwifery Incentive Scheme started in 2006  
272 aimed to increase the facility deliveries by paying midwives and other trained health personnel

with cash incentives based on the number of live births they attend in public health facilities.(35) These programs may have been effective in improving both the utilization and quality of delivery care. According to the 2014 CDHS report, 69% of deliveries took place in the public sector and 85.8% of births were attended by a midwife or a doctor.(15) Nonetheless, we found a large gap in postpartum care before and after discharge which highlights missed opportunities for high-quality delivery care (**supplemental table 4 and supplemental figure 1**). A meta-analysis found that receiving antenatal to postnatal care could reduce the risk of combined neonatal, perinatal, and maternal mortality by 15%.(36) The National Strategy for Reproductive and Sexual Health in 2017-2020 recommends four postnatal checks, one before and three after discharge.(26) Despite these recommendations, mothers rarely return to the facilities after they get discharged. Inadequate transportation and long distances to health facilities might discourage women to return to the facilities after getting discharged. More outreach efforts like home visits, promotion of postnatal care during the antenatal period and at delivery are needed to ensure a continuum of delivery care for both mothers and newborns.

We found the largest difference (65.1%) between crude and effective coverage for children with fever in 2010. Effective coverage (blood test for suspected malaria) only improved by 1.1% from 2010 to 2014. This small increase in coverage might have resulted in a dramatic reduction in malaria related deaths in Cambodia. In 2018, no malaria related deaths was reported for the first time in the country's history.(37) The percentage of malaria cases significantly fell from 61% in 2015 to 27% in 2018.(37) This promising improvement could have reduced the number of blood tests for suspected malaria cases.

Effective coverage lags behind crude coverage in Cambodia, indicating a need for improving the quality of MCH care. Similar or even lower levels of effective coverage have been found in other countries. Across 91 LMICs, effective coverage for ANC ranged from 53.8% on average in low-income countries, to 93.3% in upper-middle-income countries.(7) In Rwanda, only 40.2% of women who gave birth in a facility in 2015 received a check-up before discharge while this estimate was almost the double (80.1%) in Cambodia.(6) Quality-adjusted coverage for ANC (women who had at least 4 ANC visits and received at least 11 quality focuses intervention items) was about a half in Myanmar (14.6%) compared to Cambodia (32.8%).(38) In Haiti, an average effective coverage for curative sick childcare, including taking history, testing, and managing care, was 11.8% in 2013 while this estimate was almost tripled (29.7%) in Cambodia.(11) Leslie et al found that effective coverage, providers' adherence to evidence-based care guidelines, for sick childcare was 37% in 8 LMICs between 2007 and 2015.(39) About 3 in 10 children received ORS in Vietnam (30.0%) and Cambodia (26.0%) in 2014.(40)

This study includes several limitations. First, the quality measures are not inclusive as they included only a limited number of recommended items that should be completed during MCH services. For instance, effective coverage for childbirth included only one item: checkup before discharge. Many other components of care are required for high-quality delivery care included a positive user experience (respectful, patient-centered delivery care) and high-quality intrapartum technical care. In addition, quality for sick child care was measured by whether the child received an appropriate treatment (ORS for diarrhea, antibiotics for suspected pneumonia, and

1  
2  
3  
4 314 blood test for suspected malaria) but the survey did not ask whether the healthcare providers  
5 315 explained the proper treatment instructions to the caregivers or conveyed their diagnosis. Given  
6 316 these limited measures, our quality estimates should be regarded as an upper bound of quality, a  
7 317 starting point for estimating quality-adjusted coverage rather than a definite estimate. Thus,  
8 318 better quality measures - user experience, competent care, and timeliness of care - are needed.  
9 319 More studies need to go beyond utilization of care and investigate health system quality.

12 320 Second, although we included the most recent CDHS surveys, our latest data points are from  
13 321 2014. The CDHS announced an upcoming 2020-21 survey.(41) The Global Financing Facility  
14 322 estimated that service disruptions during the COVID-19 pandemic could have the potential to  
15 323 leave 313,900 children without oral antibiotics for pneumonia and 77,600 women without access  
16 324 to facility deliveries.(42) In Laos, antenatal care and postnatal care declined by an estimated 10%  
17 325 and 9%, respectively, immediately after the declaration of the pandemic.(43) Future studies  
18 326 should estimate the effect of the COVID-19 pandemic on effective coverage in Cambodia.

21 327 Third, DHS data is self-reported by caregivers which is subject to recall bias. Women tend to  
22 328 report less accurately about care related to more complex diseases such as pneumonia (44) but  
23 329 they report better for more invasive procedures such as a blood test. (45) To address reporting  
24 330 biases, other studies on quality of care have linked household surveys with facility  
25 331 assessments.(46) In 2008, Cambodia implemented the Service Availability and Readiness  
26 332 Assessment (SARA), a national health facility assessment.(47) Future studies should try to link  
27 333 different types of surveys to provide a more comprehensive picture of health system quality in  
28 334 Cambodia. Fourth, the findings are applicable only to the study country.

## 335 **Conclusion**

336 336 Despite the substantial improvement in maternal and child outcomes in the past decades in  
337 337 Cambodia, efforts are needed to improve quality of care. As Cambodia strives to meet the health-  
338 338 related SDGs by 2030, focusing on effective coverage will be important more than ever to  
339 339 address the residual maternal and child mortality. Additionally, inequalities across  
340 340 socioeconomic status need to be addressed to achieve equitable quality healthcare. Our study  
341 341 recommends policies to improve regulation and quality improvement efforts among the private  
342 342 sector where curative services for sick childcare are often provided. To our knowledge, this is the  
343 343 first study providing sound evidence of the quality of care in Cambodia over time. Health system  
344 344 strengthening efforts need to go beyond just improving the utilization of care and start focusing  
345 345 on the content of care and patients' experience. The COVID-19 pandemic has shown the need  
346 346 for resilient, high-quality health systems more than ever. Thus, Cambodia needs to seize this  
347 347 moment to shift its attention and funding towards building a high-quality health system.

51 348

## 53 349 **Funding**



1  
2  
3  
4 350 This study was supported by the Korea Foundation for International Healthcare. Award/Grant  
5 351 number: N/A

6  
7 352 **Competing interests**

8  
9 353 The authors declare that they have no competing interests.

10  
11 354 **Contributions**

12  
13 355 MKK, SEK, CA were involved in the conceptualization and interpretation of findings and helped  
14 356 draft the manuscript. MKK and SAK conducted data analysis. JHW and CEK helped draft the  
15 357 manuscript.

16  
17 358 **Patient consent for publication**

18  
19 359 Not required

20  
21 360 **Ethics approval**

22  
23 361 Since this study uses publicly available data, an ethical approval was not needed.

24  
25 362 **Data sharing statement**

26  
27 363 Data are available upon reasonable request. The data on the selected maternal and child health  
28 364 indicators were taken from the women's and children's questionnaire of the DHS surveys, and  
29 365 the data set is available on request after registering as a user (<https://dhsprogram.com/Data/>).(48)

30  
31 366

32  
33 367

**References**

1. United Nations. The Sustainable Development Goals Report 2016 [Internet]. New York; 2016. Available from: [https://nacoesunidas.org/wp-content/uploads/2016/07/The\\_Sustainable\\_Development\\_Goals\\_Report\\_2016.pdf](https://nacoesunidas.org/wp-content/uploads/2016/07/The_Sustainable_Development_Goals_Report_2016.pdf)
2. Kruk ME, Chukwuma A, Mbaruku G, Leslie HH. Variation in quality of primary-care services in Kenya, Malawi, Namibia, Rwanda, Senegal, Uganda and the United Republic of Tanzania. *Bull World Health Organ*. 2017 Jun 1;95(6):408–18.
3. Kruk ME, Leslie HH, Verguet S, Mbaruku GM, Adanu RMK, Langer A. Quality of basic maternal care functions in health facilities of five African countries: an analysis of national health system surveys. *Lancet Glob Health*. 2016 Nov 1;4(11):e845–55.
4. Kruk ME, Gage AD, Arsenault C, Jordan K, Leslie HH, Roder-DeWan S, et al. High-quality health systems in the Sustainable Development Goals era: time for a revolution. *Lancet Glob Health*. 2018 Nov 1;6(11):e1196–252.
5. Gage AD, Leslie HH, Bitton A, Jerome JG, Thermidor R, Joseph JP, et al. Assessing the quality of primary care in Haiti. *Bull World Health Organ*. 2017 Mar 1;95(3):182–90.
6. Hategeka C, Arsenault C, Kruk ME. Temporal trends in coverage, quality and equity of maternal and child health services in Rwanda, 2000–2015. *BMJ Glob Health*. 2020 Nov 1;5(11):e002768.
7. Arsenault C, Jordan K, Lee D, Dinsa G, Manzi F, Marchant T, et al. Equity in antenatal care quality: an analysis of 91 national household surveys. *Lancet Glob Health*. 2018 Nov 1;6(11):e1186–95.
8. Nguyen PH, Khuong LQ, Pramanik P, Billah SM, Menon P, Piwoz E, et al. Effective coverage of nutrition interventions across the continuum of care in Bangladesh: insights from nationwide cross-sectional household and health facility surveys. *BMJ Open*. 2021 Jan 20;11(1):e040109.
9. Amouzou A, Leslie HH, Ram M, Fox M, Jiwani SS, Requejo J, et al. Advances in the measurement of coverage for RMNCH and nutrition: from contact to effective coverage. *BMJ Glob Health*. 2019 May 1;4(Suppl 4):e001297.
10. Marsh AD, Muzigaba M, Diaz T, Requejo J, Jackson D, Chou D, et al. Effective coverage measurement in maternal, newborn, child, and adolescent health and nutrition: progress, future prospects, and implications for quality health systems. *Lancet Glob Health*. 2020 May 1;8(5):e730–6.
11. Leslie HH, Malata A, Ndiaye Y, Kruk ME. Effective coverage of primary care services in eight high-mortality countries. *BMJ Glob Health*. 2017;2(3):e000424.
12. Wang W, Mallick L, Allen C, Pullum T. Effective coverage of facility delivery in Bangladesh, Haiti, Malawi, Nepal, Senegal, and Tanzania. *PLOS ONE*. 2019 Jun 11;14(6):e0217853.
13. World Bank Group. World Bank Open Data | Data [Internet]. [cited 2022 Jan 3]. Available from: <https://data.worldbank.org/>
14. World Health Organization. Regional Office for the Western Pacific. The Kingdom of Cambodia health system review [Internet]. WHO Regional Office for the Western Pacific; 2015 [cited 2022 Jan 3]. xxxii, 178 p. Available from: <https://apps.who.int/iris/handle/10665/208213>



- 1  
2  
3  
4 405 15. Statistics/Cambodia NI of, Health/Cambodia DG for, International ICF. Cambodia Demographic and  
5 406 Health Survey 2014. 2015 Sep 1 [cited 2021 Nov 5]; Available from:  
6 407 <https://dhsprogram.com/publications/publication-fr312-dhs-final-reports.cfm>  
7
- 8 408 16. Pierce H. Increasing health facility deliveries in Cambodia and its influence on child health. *Int J Equity*  
9 409 *Health*. 2019 May 14;18(1):67.  
10
- 11 410 17. Liljestrand J, Sambath MR. Socio-economic improvements and health system strengthening of maternity  
12 411 care are contributing to maternal mortality reduction in Cambodia. *Reprod Health Matters*. 2012 Jan  
13 412 1;20(39):62–72.  
14
- 15 413 18. Kruk ME, Gage AD, Joseph NT, Danaei G, García-Saisó S, Salomon JA. Mortality due to low-quality  
16 414 health systems in the universal health coverage era: a systematic analysis of amenable deaths in 137  
17 415 countries. *The Lancet* [Internet]. 2018 Sep [cited 2018 Sep 12]; Available from:  
18 416 <https://linkinghub.elsevier.com/retrieve/pii/S0140673618316684>  
19
- 20 417 19. Jimenez-Soto E, Durham J, Hodge A. Entrenched Geographical and Socioeconomic Disparities in Child  
21 418 Mortality: Trends in Absolute and Relative Inequalities in Cambodia. *PLOS ONE*. 2014 Oct  
22 419 8;9(10):e109044.  
23
- 24 420 20. Hong R, Them R. Inequality in Access to Health Care in Cambodia: Socioeconomically Disadvantaged  
25 421 Women Giving Birth at Home Assisted by Unskilled Birth Attendants. *Asia Pac J Public Health*. 2015  
26 422 Mar 1;27(2):NP1039–49.  
27
- 28 423 21. Wang W, Hong R. Levels and determinants of continuum of care for maternal and newborn health in  
29 424 Cambodia-evidence from a population-based survey. *BMC Pregnancy Childbirth*. 2015 Mar 19;15:62.  
30
- 31 425 22. Chomat AM, Grundy J, Oum S, Bermudez OI. Determinants of utilisation of intrapartum obstetric care  
32 426 services in Cambodia, and gaps in coverage. *Glob Public Health*. 2011;6(8):890–905.  
33
- 34 427 23. Chham S, Radovich E, Buffel V, Ir P, Wouters E. Determinants of the continuum of maternal health care  
35 428 in Cambodia: an analysis of the Cambodia demographic health survey 2014. *BMC Pregnancy Childbirth*.  
36 429 2021 Jun 2;21(1):410.  
37
- 38 430 24. Rutstein SO, Rojas G. *Guide to DHS Statistics*. :171.  
39
- 40 431 25. World Health Organization. WHO recommendations on antenatal care for a positive pregnancy  
41 432 experience. 2016.  
42
- 43 433 26. MoH/UNFPA. National Strategy for Reproductive and Sexual Health in Cambodia, 2017-2020 [Internet].  
44 434 2017 p. 64. Available from: [https://cambodia.unfpa.org/en/publications/national-strategy-reproductive-](https://cambodia.unfpa.org/en/publications/national-strategy-reproductive-and-sexual-health-cambodia-2017-2020)  
45 435 [and-sexual-health-cambodia-2017-2020](https://cambodia.unfpa.org/en/publications/national-strategy-reproductive-and-sexual-health-cambodia-2017-2020)  
46
- 47 436 27. World Health Organization. Standards for improving the quality of care for children and young  
48 437 adolescents in health facilities. 2018.  
49
- 50 438 28. USAID. Standard Recode Manual for DHS 6 [Internet]. MEASURE DHS/ICF International; 2013 [cited  
51 439 2021 Nov 22]. Available from: [https://dhsprogram.com/publications/publication-dhsg4-dhs-](https://dhsprogram.com/publications/publication-dhsg4-dhs-questionnaires-and-manuals.cfm)  
52 440 [questionnaires-and-manuals.cfm](https://dhsprogram.com/publications/publication-dhsg4-dhs-questionnaires-and-manuals.cfm)  
53
- 54 441 29. Rutstein SO, Johnson K. The DHS wealth index. 2004 Aug 1 [cited 2022 Apr 22]; Available from:  
55 442 <https://dhsprogram.com/publications/publication-cr6-comparative-reports.cfm>  
56  
57  
58  
59  
60

- 1  
2  
3  
4 443 30. Arsenault C, Kim MK, Aryal A, Faye A, Joseph JP, Kassa M, et al. Hospital-provision of essential  
5 444 primary care in 56 countries: determinants and quality. *Bull World Health Organ*. 2020 Nov 1;98(11):735-  
6 445 746D.  
7  
8 446 31. Department of Planning & Health Information. The Third Health Strategic Plan 2016-2020 (HSP3)  
9 447 [Internet]. 2016 May. Available from: [http://hismohcambodia.org/public/fileupload/carousel/HSP3-\(2016-](http://hismohcambodia.org/public/fileupload/carousel/HSP3-(2016-2020).pdf)  
10 448 [2020\).pdf](http://hismohcambodia.org/public/fileupload/carousel/HSP3-(2016-2020).pdf)  
11  
12 449 32. Annear PL, Lee JT, Khim K, Ir P, Moscoe E, Jordanwood T, et al. Protecting the poor? Impact of the  
13 450 national health equity fund on utilization of government health services in Cambodia, 2006-2013. *BMJ*  
14 451 *Glob Health*. 2019 Nov 1;4(6):e001679.  
15  
16 452 33. Kaba MW, Baesel K, Poch B, Bun S, Cerceau S, Bury L, et al. IDPoor: a poverty identification  
17 453 programme that enables collaboration across sectors for maternal and child health in Cambodia. *BMJ*.  
18 454 2018 Dec 7;363:k4698.  
19  
20 455 34. Lee HY, Heo J, Koh H. Effect of a comprehensive program on maternal and child healthcare service in  
21 456 Battambang, Cambodia: A multivariate difference-in-difference analysis. *J Glob Health Sci* [Internet].  
22 457 2019 May 27 [cited 2021 Dec 16];1(1). Available from: <https://doi.org/10.35500/jghs.2019.1.e2>  
23  
24 458 35. Ir P, Korachais C, Chheng K, Horemans D, Van Damme W, Meessen B. Boosting facility deliveries with  
25 459 results-based financing: a mixed-methods evaluation of the government midwifery incentive scheme in  
26 460 Cambodia. *BMC Pregnancy Childbirth*. 2015 Aug 15;15(1):170.  
27  
28 461 36. Kikuchi K, Ansah EK, Okawa S, Enuameh Y, Yasuoka J, Nanishi K, et al. Effective Linkages of  
29 462 Continuum of Care for Improving Neonatal, Perinatal, and Maternal Mortality: A Systematic Review and  
30 463 Meta-Analysis. *PLOS ONE*. 2015 Sep 30;10(9):e0139288.  
31  
32 464 37. World Health Organization. World malaria report. Geneva; 2019.  
33  
34 465 38. Okawa S, Win HH, Leslie HH, Nanishi K, Shibnuma A, Aye PP, et al. Quality gap in maternal and  
35 466 newborn healthcare: a cross-sectional study in Myanmar. *BMJ Glob Health*. 2019 Mar 1;4(2):e001078.  
36  
37 467 39. Leslie HH, Sun Z, Kruk ME. Association between infrastructure and observed quality of care in 4  
38 468 healthcare services: A cross-sectional study of 4,300 facilities in 8 countries. *PLOS Med*. 2017 Dec  
39 469 12;14(12):e1002464.  
40  
41 470 40. Nguyen PT, Rahman MS, Le PM, Nguyen HV, Vu KD, Nguyen HL, et al. Trends in, projections of, and  
42 471 inequalities in reproductive, maternal, newborn and child health service coverage in Vietnam 2000-2030:  
43 472 A Bayesian analysis at national and sub-national levels. *Lancet Reg Health West Pac*. 2021  
44 473 Oct;15:100230.  
45  
46 474 41. The DHS Program - Cambodia: Standard DHS, 2021 [Internet]. [cited 2021 Nov 26]. Available from:  
47 475 <https://dhsprogram.com/methodology/survey/survey-display-558.cfm>  
48  
49 476 42. Global Financing Facility. Preserve Essential Health Services During the Covid-19 Pandemic Cambodia  
50 477 [Internet]. Available from:  
51 478 [https://www.globalfinancingfacility.org/sites/gff\\_new/files/documents/Cambodia-Covid-Brief\\_GFF.pdf](https://www.globalfinancingfacility.org/sites/gff_new/files/documents/Cambodia-Covid-Brief_GFF.pdf)  
52  
53 479 43. Arsenault C, Gage A, Kim MK, Kapoor NR, Akweongo P, Amponsah F, et al. COVID-19 and resilience  
54 480 of healthcare systems in ten countries. *Nat Med*. 2022 Mar 14;1–11.  
55  
56  
57  
58  
59  
60

- 1  
2  
3  
4 481 44. Hazir T, Begum K, El Arifeen S, Khan AM, Huque MH, Kazmi N, et al. Measuring coverage in MNCH: a  
5 482 prospective validation study in Pakistan and Bangladesh on measuring correct treatment of childhood  
6 483 pneumonia. PLoS Med. 2013;10(5):e1001422.  
7  
8 484 45. Stanton CK, Rawlins B, Drake M, dos Anjos M, Cantor D, Chongo L, et al. Measuring Coverage in  
9 485 MNCH: Testing the Validity of Women’s Self-Report of Key Maternal and Newborn Health Interventions  
10 486 during the Peripartum Period in Mozambique. PLoS ONE. 2013 May 7;8(5):e60694.  
11  
12 487 46. Bryce J, Arnold F, Blanc A, Hancioglu A, Newby H, Requejo J, et al. Measuring Coverage in MNCH:  
13 488 New Findings, New Strategies, and Recommendations for Action. PLOS Med. 2013 May  
14 489 7;10(5):e1001423.  
15  
16 490 47. O’Neill K, Takane M, Sheffel A, Abou-Zahr C, Boerma T. Monitoring service delivery for universal  
17 491 health coverage: the Service Availability and Readiness Assessment. Bull World Health Organ. 2013 Dec  
18 492 1;91(12):923–31.  
19  
20 493 [dataset] 48. The DHS Program - Data [Internet]. [cited 2022 May 13]. Available from:  
21 494 <https://dhsprogram.com/Data/>  
22  
23 495

24  
25 **Figure Legend:**

- 26 496  
27 497  
28 498 Figure 1 – Line graphs  
29 499  
30 500 Figure 2 – Equiplots  
31 501  
32 502 Figure 3 – Line graphs  
33 503  
34 504 Figure 4 – Equiplots  
35  
36  
37  
38  
39  
40  
41  
42  
43  
44  
45  
46  
47  
48  
49  
50  
51  
52  
53  
54  
55  
56  
57  
58  
59  
60

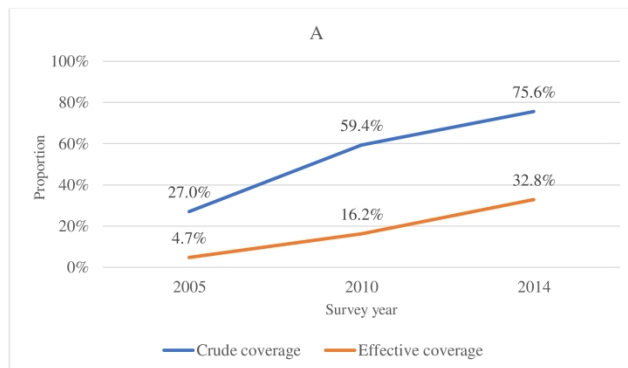

**A. Antenatal care (at least four visits)**

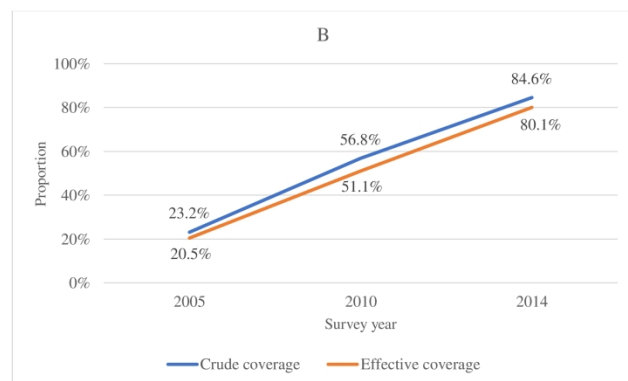

**B. Facility delivery**

**Figure 1.** Crude and effective coverage of maternal health care in Cambodia from 2005 to 2014. (A) at least 4 antenatal care (ANC) visits; (B) facility delivery.

Footnote: Effective coverage for antenatal care was estimated by the proportion of women who received at least four ANC visits and reported receiving five basic services at any point during ANC: their blood pressure was measured, a urine and a blood sample was collected, they were given or bought iron tablets or syrup, and they were counseled on potential complications to look out for during pregnancy. Effective coverage for facility delivery was defined as the proportion of women who delivered at a health facility and who reported that someone examined them or asked questions about their health before being discharged.

1

Figure 1 - Line graphs

215x279mm (300 x 300 DPI)

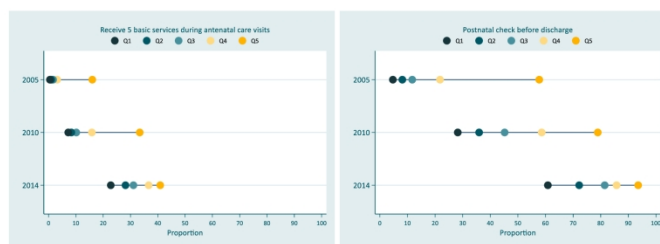

A. Wealth quintile

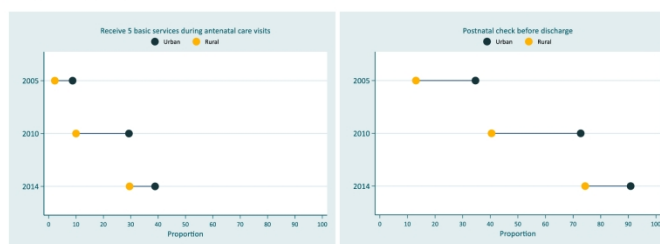

B. Area of residence (urban vs rural)

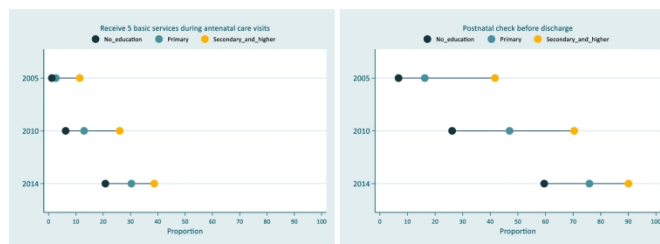

C. Women's education (no education, primary, and secondary and higher)

Figure 2. Equity in effective coverage of maternal health in Cambodia from 2005 to 2014 across 1) wealth quintile 2) area of residence (urban vs rural) 3) women's education (no education, primary, and secondary and higher)

1

Figure 2 - Equiplots

215x279mm (300 x 300 DPI)

1  
2  
3  
4  
5  
6  
7  
8  
9  
10  
11  
12  
13  
14  
15  
16  
17  
18  
19  
20  
21  
22  
23  
24  
25  
26  
27  
28  
29  
30  
31  
32  
33  
34  
35  
36  
37  
38  
39  
40  
41  
42  
43  
44  
45  
46  
47  
48  
49  
50  
51  
52  
53  
54  
55  
56  
57  
58  
59  
60



**Figure 3.** Crude and effective coverage of care for child health in Cambodia from 2005 to 2014. (A) diarrhea; (B) pneumonia; (C) fever.  
 Footnote: Data for effective coverage of pneumonia in 2005 were missing. Effective coverage for diarrhea was defined as the proportion of children who sought care at a health facility for diarrhea and who received oral rehydration therapy (ORT) from a special packet, pre-packaged or from a homemade fluid. Effective coverage for pneumonia was defined as the proportion of children who visited a health facility for pneumonia and who received antibiotics (pills, syrup, or injection). Effective coverage for fever was defined as children who sought care at a health facility and received a blood test for suspected malaria.

1

Figure 3 - Line graphs  
 279x215mm (300 x 300 DPI)

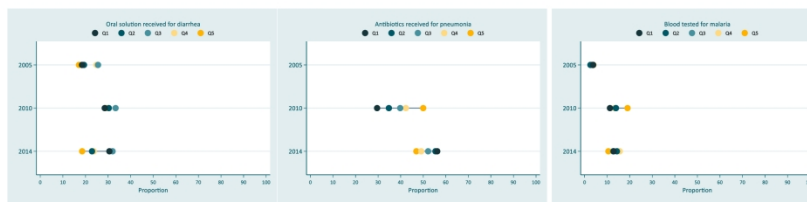

A. Wealth quintile

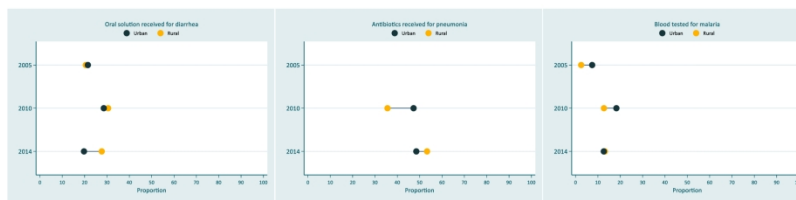

B. Area of residence (urban vs rural)

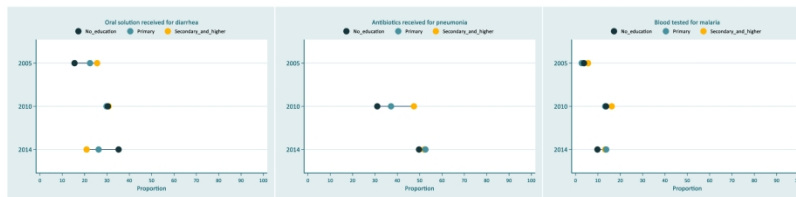

C. Women's education (no education, primary, and secondary and higher)

**Figure 4.** Equity in effective coverage of child health in Cambodia from 2005 to 2014 across 1) wealth quintile 2) area of residence (urban vs rural) 3) women's education (no education, primary, and secondary and higher).

Footnote: Data for effective coverage of pneumonia in 2005 were missing.

1

Figure 4 - Equiplots

215x279mm (300 x 300 DPI)

Supplementary file

Measuring effective coverage of maternal and child health services in Cambodia: a retrospective analysis of Demographic and Health Surveys from 2005 to 2014

Min Kyung Kim, Soon Ae Kim, Ju Hwan Oh, Chae Eun Kim, Catherine Arsenault

Supplemental table 1. Indicator definitions and measurement strategy for crude coverage, effective coverage, and inequality, Cambodia Demographic Health Surveys

Table with 4 columns: Indicators, Type, Measurement, and DHS measurement. It details 'Crude coverage' and 'Effective coverage' for Antenatal care (ANC) with their respective measurement strategies and DHS question numbers (Q412, Q413, Q421, Q414).



| Indicators                                                                                                                                                                                                                               | Type   | Measurement                                                                                                                                                                                           | DHS measurement                                                                                                                                                                                                                                                |
|------------------------------------------------------------------------------------------------------------------------------------------------------------------------------------------------------------------------------------------|--------|-------------------------------------------------------------------------------------------------------------------------------------------------------------------------------------------------------|----------------------------------------------------------------------------------------------------------------------------------------------------------------------------------------------------------------------------------------------------------------|
| <b>2. Facility delivery</b>                                                                                                                                                                                                              |        |                                                                                                                                                                                                       |                                                                                                                                                                                                                                                                |
| <b>Crude coverage:</b><br>Women with a recent live birth within 5-years prior to each survey wave and delivered their last baby at the health facilities                                                                                 | Binary | 0.No<br>1. Yes, delivered at the facilities (excluding home and unspecified locations)<br><br>Skilled birth attendant includes general practitioner, obstetrician, nurse, midwife and village midwife | Q434: Where did you give birth to (NAME)?                                                                                                                                                                                                                      |
| <b>Effective coverage:</b><br>Women with a recent live birth within 5-years prior to each survey wave received postnatal care for their newborn before getting discharged                                                                | Binary | 0.No<br>1. Yes                                                                                                                                                                                        | Q436: After you gave birth to (NAME), did anyone check on your baby health while you were still in the facility?                                                                                                                                               |
| <b>3. Sick child - diarrhea</b>                                                                                                                                                                                                          |        |                                                                                                                                                                                                       |                                                                                                                                                                                                                                                                |
| <b>Crude coverage:</b><br>All children under 5 years reported to have had symptoms in the 2 weeks before the survey and seek treatment from health facility                                                                              | Binary | 0. No<br>1. Yes, from health facility (excluding pharmacies)                                                                                                                                          | Q611: Did you seek advice or treatment for the diarrhea from any source?<br>Q612: Where did you seek advice or treatment?                                                                                                                                      |
| <b>Effective coverage:</b><br>All children under 5 years reported to have had symptoms in the 2 weeks before the survey and seek treatment and received oral rehydration therapy (ORT)/increased fluids from health facility or provider | Binary | 0. No<br>1. Yes, received ORS / a pre-packaged / ORS/homemade fluid                                                                                                                                   | Q615: Was (NAME) given any of the following at any time since (NAME) started having the diarrhea:<br>a) A fluid made from a special packet called [LOCAL NAME FOR ORS PACKET]?<br>b) A pre-packaged ORS liquid?<br>c) A government-recommended homemade fluid? |
| <b>4. Sick child – pneumonia</b>                                                                                                                                                                                                         |        |                                                                                                                                                                                                       |                                                                                                                                                                                                                                                                |
| <b>Crude coverage:</b><br>All children under-5 years reported to have had symptoms in the 2 weeks before the survey and                                                                                                                  | Binary | 0. No<br>1. Yes, from facility (excluding pharmacies)                                                                                                                                                 | Q620. Where did you seek advice or treatment for pneumonia?<br>Q625. Where did you seek advice or treatment?                                                                                                                                                   |

| Indicators                                                                                                                                                                  | Type                | Measurement                                                                              | DHS measurement                                                                                                                                                                                                                                                                                                                                                                                                                          |
|-----------------------------------------------------------------------------------------------------------------------------------------------------------------------------|---------------------|------------------------------------------------------------------------------------------|------------------------------------------------------------------------------------------------------------------------------------------------------------------------------------------------------------------------------------------------------------------------------------------------------------------------------------------------------------------------------------------------------------------------------------------|
| were taken to a medical facility for treatment                                                                                                                              |                     |                                                                                          |                                                                                                                                                                                                                                                                                                                                                                                                                                          |
| <b>Effective coverage:</b><br>All children under-5 years reported to have had symptoms in the 2 weeks before the survey and received antibiotic pills, syrup, or injections | Binary              | 0. No<br>1. Yes, antibiotic drugs / PILL/SYRUP (J) INJECTION/IV (K)                      | Q630. What drugs did (NAME) take?                                                                                                                                                                                                                                                                                                                                                                                                        |
| <b>5. Sick child – fever</b>                                                                                                                                                |                     |                                                                                          |                                                                                                                                                                                                                                                                                                                                                                                                                                          |
| <b>Crude coverage:</b><br>All children under 5-years reported to have had symptoms in the 2 weeks before the survey and were taken to a medical facility for treatment      | Binary              | 0. No<br>1. Yes, from facility (excluding pharmacies)                                    | Q618. Has (NAME) been ill with a fever at any time in the last 2 weeks?<br>Q625. Where did you seek advice or treatment?                                                                                                                                                                                                                                                                                                                 |
| <b>Effective coverage:</b><br>All children under 5-years reported to have had symptoms in the 2 weeks and had blood taken from finger or heel for testing                   | Binary              | 0. No<br>1. Yes                                                                          | [no question available in the DHS survey but the data are available]                                                                                                                                                                                                                                                                                                                                                                     |
| <b>MEASURES OF SOCIOECONOMIC POSITION</b>                                                                                                                                   |                     |                                                                                          |                                                                                                                                                                                                                                                                                                                                                                                                                                          |
| Wealth index                                                                                                                                                                | Categorical ordinal | 0. Poorest / least wealthy<br>1. Poor<br>2. Middle<br>3. Rich<br>4. Richest / wealthiest | The wealth index is a composite measure of a household's cumulative living standard. The wealth index is calculated using easy-to-collect data on a household's ownership of selected assets, such as televisions and bicycles; materials used for housing construction; and types of water access and sanitation facilities. The wealth index is presented in the DHS Final Reports and survey datasets as a background characteristic. |
| Education                                                                                                                                                                   | Categorical ordinal | 0. Primary/lower<br>1. Secondary<br>2. Tertiary/higher                                   | Q107: Have you ever attended school?<br>Q108: What is the highest level of school you attended: primary, junior high, senior high, academy or university?                                                                                                                                                                                                                                                                                |

| Indicators | Type   | Measurement          | DHS measurement                                                     |
|------------|--------|----------------------|---------------------------------------------------------------------|
|            |        |                      | Q109: What is the highest (grade/year) you completed at that level? |
| Residency  | Binary | 0. Rural<br>1. Urban | Q5: Urban/rural (identified by interviewers)                        |

For peer review only

**Supplemental table 2.** Crude and effective coverage of maternal and child health in Cambodia from 2000 to 2014.

| Survey, year             | 2000  |               | 2005  |               | 2010  |                | 2014  |               |
|--------------------------|-------|---------------|-------|---------------|-------|----------------|-------|---------------|
|                          | Mean  | (95% CI)      | Mean  | (95% CI)      | Mean  | (95% CI)       | Mean  | (95% CI)      |
| <b>Antenatal care</b>    |       |               |       |               |       |                |       |               |
| Crude coverage           | 8.9%  | (7.8 - 10.3)  | 27.0% | (24.7 - 29.5) | 59.4% | (57.0 - 61.7)  | 75.6% | (73.6 - 77.5) |
| Effective coverage       | 1.3%  | (1.0 - 1.9)   | 4.7%  | (3.7 - 6.0)   | 16.2% | (14.8 - 17.7)  | 32.8% | (30.8 - 34.9) |
| <b>Facility delivery</b> |       |               |       |               |       |                |       |               |
| Crude coverage           | 11.0% | (9.3 - 13.8)  | 23.2% | (20.5 - 26.1) | 56.8% | (54.1 - 59.4)  | 84.6% | (82.4 - 86.5) |
| Effective coverage       | --    | --            | 20.5% | (18.0 - 23.2) | 51.1% | (48.53 - 53.7) | 80.1% | (77.9 - 82.2) |
| <b>Diarrhea</b>          |       |               |       |               |       |                |       |               |
| Crude coverage           | 21.6% | (18.8 - 24.8) | 41.1% | (37.5 - 44.8) | 58.9% | (55.2 - 62.6)  | 55.5% | (50.9 - 60.0) |
| Effective coverage       | 7.8%  | (6.8 - 9.7)   | 21.1% | (18.3 - 24.1) | 27.7% | (24.3 - 31.3)  | 26.0% | (21.8 - 30.6) |
| <b>Pneumonia</b>         |       |               |       |               |       |                |       |               |
| Crude coverage           | 35.1% | (32.2 - 38.1) | 46.9% | (43.7 - 50.2) | 72.9% | (69.7 - 75.9)  | 61.3% | (57.4 - 65.0) |
| Effective coverage       | 30.4% | (27.7 - 33.2) | --    | --            | 37.3% | (34.0 - 40.8)  | 51.5% | (47.5 - 55.5) |
| <b>Fever</b>             |       |               |       |               |       |                |       |               |
| Crude coverage           | 34.1% | (31.4 - 36.9) | 47.8% | (44.6 - 51.1) | 75.5% | (72.6 - 78.1)  | 60.6% | (57.3 - 63.8) |
| Effective coverage       | --    | --            | 2.3%  | (1.7 - 3.1)   | 10.3% | (8.7 - 12.2)   | 11.5% | (9.5 - 13.9)  |

Note: -- Data are not available; effective coverage for facility delivery in 2000 and sick childcare for fever in 2000 and sick childcare for pneumonia in 2005.

**Supplemental table 3.** Risk ratios in effective coverage of five maternal and child health services between richest and poorest, least and most educated and urban vs. rural residents, Cambodia Demographic and Health Survey 2014

| Indicators                                  | Wealth quintile (Q5 vs. Q1) |             | Urban-rural area |             | Women's education levels<br>(Secondary or higher education vs. no education) |             |
|---------------------------------------------|-----------------------------|-------------|------------------|-------------|------------------------------------------------------------------------------|-------------|
|                                             | RR                          | (95% CI)    | RR               | (95% CI)    | RR                                                                           | (95% CI)    |
| Received 5 basic services during ANC visits | 1.7***                      | (1.5 - 2.0) | 1.5***           | (1.3 - 1.6) | 1.9***                                                                       | (1.6 - 2.2) |
| Postnatal check before discharge            | 1.4***                      | (1.4 - 1.5) | 1.2***           | (1.2 - 1.2) | 1.4***                                                                       | (1.3 - 1.5) |
| Oral solution received for diarrhea         | 0.6*                        | (0.4 - 0.9) | 0.8              | (0.5 - 1.2) | 0.5**                                                                        | (0.3 - 0.8) |
| Antibiotics received for pneumonia          | 0.9                         | (0.8 - 1.1) | 0.8*             | (0.7 - 0.9) | 1.0                                                                          | (0.8 - 1.2) |
| Blood tested for malaria                    | 0.8                         | (0.5 - 1.1) | 0.8              | (0.6 - 1.2) | 1.3                                                                          | (0.8 - 2.0) |

Note: P<0.001\*\*\*, P<0.01\*\*, and P<0.05\*. RR = Risk Ratio, CI = Confidence Interval; The RR is the ratio in effective coverage between top and bottom sub-groups: socioeconomic status – wealthiest quintile vs poorest quintile; urban and rural areas; and secondary or higher education vs. no education. RR>1 indicates pro-rich distribution (higher effective coverage in the top group); RR<1 indicates pro-poor distribution (higher effective coverage in the lower sub-groups; RR=1 suggest an equal distribution in the effective coverage indicator.

1  
2  
3  
4  
5  
6  
7  
8  
9  
10  
11  
12  
13  
14  
15  
16  
17  
18  
19  
20  
21  
22  
23  
24  
25  
26  
27  
28  
29  
30  
31  
32  
33  
34  
35  
36  
37  
38  
39  
40  
41  
42  
43  
44  
45  
46  
47

**Supplemental table 4.** Crude and effective coverage of facility delivery (postnatal checkup after discharge) in Cambodia from 2005 to 2014

| Survey, year             | 2005  |               | 2010  |               | 2014  |               |
|--------------------------|-------|---------------|-------|---------------|-------|---------------|
|                          | Mean  | (95% CI)      | Mean  | (95% CI)      | Mean  | (95% CI)      |
| <b>Facility delivery</b> |       |               |       |               |       |               |
| Crude coverage           | 23.2% | (20.5 - 26.1) | 56.8% | (54.1 - 59.4) | 84.6% | (82.4 - 86.5) |
| Effective coverage       | 0.6%  | (0.4 - 0.9)   | 1.5%  | (1.1 - 2.0)   | 0.5%  | (0.3 - 0.8)   |

Note: Postnatal checkup after discharge is a question asked whether the mother was checked after getting discharge from the health facilities.

For peer review only



28  
29 **Supplemental figure 1.** Crude and effective coverage of facility delivery (postnatal checkup after discharge) in Cambodia from 2005  
30 to 2014.

31  
32 Note: Effective coverage for facility delivery was defined as the proportion of women who delivered at a health facility and who reported that someone examined  
33 them or asked questions about their health after being discharged.

Measuring effective coverage of maternal and child health services in Cambodia: a retrospective analysis of Demographic Health Surveys from 2005 to 2014

Min Kyung Kim, Soon Ae Kim, Juhwan Oh, Chae Eun Kim, Catherine Arsenault

bmjopen-2022-062028

**STROBE Statement—Checklist of items that should be included in reports of *cross-sectional studies***

|                           | <b>Item No</b> | <b>Recommendation</b>                                                                                                                                                                | <b>Page/line numbers where relevant information can be found</b> |
|---------------------------|----------------|--------------------------------------------------------------------------------------------------------------------------------------------------------------------------------------|------------------------------------------------------------------|
| <b>Title and abstract</b> | 1              | (a) Indicate the study's design with a commonly used term in the title or the abstract                                                                                               | Page 2, lines 30                                                 |
|                           |                | (b) Provide in the abstract an informative and balanced summary of what was done and what was found                                                                                  | Page 2, lines 42-48                                              |
| <b>Introduction</b>       |                |                                                                                                                                                                                      |                                                                  |
| Background/rationale      | 2              | Explain the scientific background and rationale for the investigation being reported                                                                                                 | Page 3, lines 62-92                                              |
| Objectives                | 3              | State specific objectives, including any prespecified hypotheses                                                                                                                     | Page 3, lines 93-96                                              |
| <b>Methods</b>            |                |                                                                                                                                                                                      |                                                                  |
| Study design              | 4              | Present key elements of study design early in the paper                                                                                                                              | Page 4, line 99                                                  |
| Setting                   | 5              | Describe the setting, locations, and relevant dates, including periods of recruitment, exposure, follow-up, and data collection                                                      | Page 4, lines 99-108                                             |
| Participants              | 6              | (a) Give the eligibility criteria, and the sources and methods of selection of participants                                                                                          | Page 4, lines 101-106                                            |
| Variables                 | 7              | Clearly define all outcomes, exposures, predictors, potential confounders, and effect modifiers. Give diagnostic criteria, if applicable                                             | Pages 4-5, lines 109-151                                         |
| Data sources/measurement  | 8*             | For each variable of interest, give sources of data and details of methods of assessment (measurement). Describe comparability of assessment methods if there is more than one group | Pages 4-5, lines 97-162                                          |
| Bias                      | 9              | Describe any efforts to address potential sources of bias                                                                                                                            | Page 4, lines 107-108                                            |
| Study size                | 10             | Explain how the study size was arrived at                                                                                                                                            |                                                                  |
| Quantitative variables    | 11             | Explain how quantitative variables were handled in the analyses. If applicable, describe which groupings were chosen and why                                                         | Page 4, lines 125-132                                            |
| Statistical methods       | 12             | (a) Describe all statistical methods, including those used to control for confounding                                                                                                | Pages 5-6, lines 163-181                                         |
|                           |                | (b) Describe any methods used to examine subgroups and interactions                                                                                                                  | N/A                                                              |
|                           |                | (c) Explain how missing data were addressed                                                                                                                                          | N/A                                                              |
|                           |                | (d) If applicable, describe analytical methods taking account of sampling strategy                                                                                                   | N/A                                                              |
|                           |                | (e) Describe any sensitivity analyses                                                                                                                                                | Pages 5-6, lines 169-                                            |



178

| <b>Results</b>           |     |                                                                                                                                                                                                              |                                            |
|--------------------------|-----|--------------------------------------------------------------------------------------------------------------------------------------------------------------------------------------------------------------|--------------------------------------------|
| Participants             | 13* | (a) Report numbers of individuals at each stage of study—eg numbers potentially eligible, examined for eligibility, confirmed eligible, included in the study, completing follow-up, and analysed            | Page 7, lines 186-195                      |
|                          |     | (b) Give reasons for non-participation at each stage                                                                                                                                                         | N/A                                        |
|                          |     | (c) Consider use of a flow diagram                                                                                                                                                                           | N/A                                        |
| Descriptive data         | 14* | (a) Give characteristics of study participants (eg demographic, clinical, social) and information on exposures and potential confounders                                                                     | Page 7, lines 186-153                      |
|                          |     | (b) Indicate number of participants with missing data for each variable of interest                                                                                                                          | N/A                                        |
| Outcome data             | 15* | Report numbers of outcome events or summary measures                                                                                                                                                         | Pages 7-8, lines 196-230                   |
| Main results             | 16  | (a) Give unadjusted estimates and, if applicable, confounder-adjusted estimates and their precision (eg, 95% confidence interval). Make clear which confounders were adjusted for and why they were included | Pages 7-8, lines 197-200, 205-208, 219-222 |
|                          |     | (b) Report category boundaries when continuous variables were categorized                                                                                                                                    | N/A                                        |
|                          |     | (c) If relevant, consider translating estimates of relative risk into absolute risk for a meaningful time period                                                                                             | N/A                                        |
| Other analyses           | 17  | Report other analyses done—eg analyses of subgroups and interactions, and sensitivity analyses                                                                                                               | Pages 7-8, lines 201-203, 209-217, 223-227 |
| <b>Discussion</b>        |     |                                                                                                                                                                                                              |                                            |
| Key results              | 18  | Summarise key results with reference to study objectives                                                                                                                                                     | Pages 9-10, lines 231-240                  |
| Limitations              | 19  | Discuss limitations of the study, taking into account sources of potential bias or imprecision. Discuss both direction and magnitude of any potential bias                                                   | Pages 11-12, lines 305-332                 |
| Interpretation           | 20  | Give a cautious overall interpretation of results considering objectives, limitations, multiplicity of analyses, results from similar studies, and other relevant evidence                                   | Pages 10-11, lines 241-304                 |
| Generalisability         | 21  | Discuss the generalisability (external validity) of the study results                                                                                                                                        | Page 12, line 332                          |
| <b>Other information</b> |     |                                                                                                                                                                                                              |                                            |
| Funding                  | 22  | Give the source of funding and the role of the funders for the present study and, if applicable, for the original study on which the present article is based                                                | Page 12, lines 347-349                     |

\*Give information separately for exposed and unexposed groups.

**Note:** An Explanation and Elaboration article discusses each checklist item and gives methodological background and published examples of transparent reporting. The STROBE checklist is best used in conjunction with this article (freely available on the Web sites of PLoS Medicine at <http://www.plosmedicine.org/>, Annals of Internal Medicine at

1  
2  
3  
4  
5  
6  
7  
8  
9  
10  
11  
12  
13  
14  
15  
16  
17  
18  
19  
20  
21  
22  
23  
24  
25  
26  
27  
28  
29  
30  
31  
32  
33  
34  
35  
36  
37  
38  
39  
40  
41  
42  
43  
44  
45  
46  
47  
48  
49  
50  
51  
52  
53  
54  
55  
56  
57  
58  
59  
60

<http://www.annals.org/>, and *Epidemiology* at <http://www.epidem.com/>). Information on the STROBE Initiative is available at [www.strobe-statement.org](http://www.strobe-statement.org).

For peer review only

# BMJ Open

## Measuring effective coverage of maternal and child health services in Cambodia: a retrospective analysis of Demographic and Health Surveys from 2005 to 2014

|                                 |                                                                                                                                                                                                                                                                                                                                                                               |
|---------------------------------|-------------------------------------------------------------------------------------------------------------------------------------------------------------------------------------------------------------------------------------------------------------------------------------------------------------------------------------------------------------------------------|
| Journal:                        | <i>BMJ Open</i>                                                                                                                                                                                                                                                                                                                                                               |
| Manuscript ID                   | bmjopen-2022-062028.R2                                                                                                                                                                                                                                                                                                                                                        |
| Article Type:                   | Original research                                                                                                                                                                                                                                                                                                                                                             |
| Date Submitted by the Author:   | 15-Jul-2022                                                                                                                                                                                                                                                                                                                                                                   |
| Complete List of Authors:       | Kim, Minkyung; Korea Foundation for International Healthcare<br>Kim, Soon Ae; Korea Foundation for International Healthcare<br>Oh, Juhwan; Seoul National University College of Medicine<br>Kim , Chae Eun; Korea Foundation for International Healthcare<br>Arsenault, C; Harvard University T H Chan School of Public Health,<br>Department of Global Health and Population |
| <b>Primary Subject Heading</b>: | Global health                                                                                                                                                                                                                                                                                                                                                                 |
| Secondary Subject Heading:      | Health policy, Health services research                                                                                                                                                                                                                                                                                                                                       |
| Keywords:                       | Health policy < HEALTH SERVICES ADMINISTRATION & MANAGEMENT,<br>Quality in health care < HEALTH SERVICES ADMINISTRATION &<br>MANAGEMENT, International health services < HEALTH SERVICES<br>ADMINISTRATION & MANAGEMENT                                                                                                                                                       |
|                                 |                                                                                                                                                                                                                                                                                                                                                                               |

SCHOLARONE™  
Manuscripts



I, the Submitting Author has the right to grant and does grant on behalf of all authors of the Work (as defined in the below author licence), an exclusive licence and/or a non-exclusive licence for contributions from authors who are: i) UK Crown employees; ii) where BMJ has agreed a CC-BY licence shall apply, and/or iii) in accordance with the terms applicable for US Federal Government officers or employees acting as part of their official duties; on a worldwide, perpetual, irrevocable, royalty-free basis to BMJ Publishing Group Ltd ("BMJ") its licensees and where the relevant Journal is co-owned by BMJ to the co-owners of the Journal, to publish the Work in this journal and any other BMJ products and to exploit all rights, as set out in our [licence](#).

The Submitting Author accepts and understands that any supply made under these terms is made by BMJ to the Submitting Author unless you are acting as an employee on behalf of your employer or a postgraduate student of an affiliated institution which is paying any applicable article publishing charge ("APC") for Open Access articles. Where the Submitting Author wishes to make the Work available on an Open Access basis (and intends to pay the relevant APC), the terms of reuse of such Open Access shall be governed by a Creative Commons licence – details of these licences and which [Creative Commons](#) licence will apply to this Work are set out in our licence referred to above.

Other than as permitted in any relevant BMJ Author's Self Archiving Policies, I confirm this Work has not been accepted for publication elsewhere, is not being considered for publication elsewhere and does not duplicate material already published. I confirm all authors consent to publication of this Work and authorise the granting of this licence.

1  
2  
3  
4  
5  
6  
7 **1 Measuring effective coverage of maternal and child health services in**  
8 **2 Cambodia: a retrospective analysis of Demographic and Health Surveys from**  
9 **3 2005 to 2014**  
10  
11  
12

13 **5 Min Kyung Kim<sup>1\*</sup>, Soon Ae Kim<sup>1\*</sup>, Juhwan Oh<sup>2</sup>, Chae Eun Kim<sup>1</sup>, Catherine Arsenaault<sup>3</sup>**  
14  
15  
16

17 <sup>1</sup> Korea Foundation for International Healthcare (KOFIH), Seoul, Republic of Korea  
18

19 <sup>2</sup> Seoul National University College of Medicine, Seoul, Republic of Korea  
20

21 <sup>3</sup> Department of Global Health and Population, Harvard T.H. Chan School of Public Health,  
22 Boston, USA  
23

24 \*Co-first authors  
25  
26  
27  
28  
29  
30  
31  
32  
33  
34  
35  
36  
37  
38  
39  
40  
41  
42  
43  
44  
45  
46  
47  
48  
49  
50  
51  
52  
53  
54  
55  
56  
57  
58  
59  
60

18 Corresponding author:

19 Min Kyung Kim

20 Korea Foundation for International (KOFIH), Seoul, Republic of Korea

21 mkkim213@gmail.com

## 27 **Abstract**

28 **Objective** To investigate effective, quality-adjusted, coverage and inequality of maternal and  
29 child health (MCH) services to assess progress in improving quality of care in Cambodia.

30 **Design** A retrospective secondary analysis using the three most recent (2005, 2010, 2014)  
31 Demographic and Health Surveys.

32 **Setting** Cambodia.

33 **Participants** 53155 women aged 15-49 years old and 23242 children under 5 years old across  
34 the three surveys.

35 **Outcome measures** We estimated crude coverage, effective coverage, and inequality in  
36 effective coverage for five MCH services over time: antenatal care (ANC), facility delivery, and  
37 sick childcare for diarrhea, pneumonia, and fever. Quality was defined by the proportion of care  
38 seekers who received a set of interventions during health care visits. Effective coverage was  
39 estimated by combining crude coverage and quality. We used equiplots and risk ratios, to assess  
40 patterns in inequality in MCH effective coverage across wealth quintile, urban-rural, and  
41 women's education levels and over time.

42 **Results** In 2014, crude and effective coverage were 80.1% and 56.4%, respectively for maternal  
43 health services (ANC and facility delivery) and 59.1% and 26.9%, respectively for sick childcare  
44 (diarrhea, pneumonia, and fever). Between 2005 and 2014, effective coverage improved for all  
45 services, but improvements were larger for maternal health care than for sick child care. In 2014,  
46 poorer children were more likely to receive ORS for diarrhea than children from richer  
47 households. Meanwhile, women from urban areas were more likely to receive a postnatal check  
48 before getting discharged.

49 **Conclusions** Effective coverage has generally improved in Cambodia but efforts remain to  
50 improve quality for all MCH services. Our results point to substantial gaps in curative sick child  
51 care, a large share of which is provided by unregulated private providers in Cambodia.  
52 Policymakers should focus on improving effective coverage, and not only crude coverage, to  
53 achieve the health-related Sustainable Development Goals by 2030.

## 54 **Strengths and limitations of this study**

- 56 • This study included nationally representative population data to estimate effective,  
57 quality-adjusted, coverage and inequality of maternal and child health services.
- 58 • This study used three waves (2005, 2010, and 2014) of surveys to observe the temporal  
59 changes in coverage, quality, and inequality.
- 60 • The study is limited by the type of measures included in the Demographic and Health  
61 Surveys to assess quality.

## 62 Introduction

63 The sustainable Development Goal (SDG) 3 aims to achieve universal health coverage (UHC),  
64 by ensuring access to quality essential health services by 2030.(1) Despite substantial  
65 improvement in access to healthcare services, quality of care remains poor and variable across  
66 low- and middle-income countries (LMICs).(2–5) The Lancet Global Health Commission on  
67 High Quality Health Systems in the SDG era (i.e., the HQSS Commission) estimated that high  
68 quality health systems could save one million newborn deaths annually.(4) Vulnerable groups,  
69 including the poor and the less educated, tend to receive worst quality of care.(5–7) Thus, quality  
70 improvement needs to be a central pillar of UHC.

71 An increasing body of evidence recommends a shift from tracking ‘crude’ or ‘contact’ coverage  
72 to ‘effective’ coverage,(5–9) defined as the proportion of a population in need of a service that  
73 resulted in a positive health outcome from the service.(10) Recent literature have shown a gap  
74 between crude and effective coverage ranged from 40% to 60% in LMICs.(7,11,12) This  
75 indicates that many patients who come in contact with the health system are not treated  
76 according to standards of care.

77 Cambodia is a lower-middle income country located in Southeast Asia with a population of  
78 16.72 million people.(13) Since the late 1990’s, the country has experienced consistent economic  
79 growth and a reduction in poverty rates.(14) In the past decades, the Cambodian government has  
80 focused on increasing utilization of maternal and child health (MCH) services. From 2000 to  
81 2014, Cambodia reduced its under-5 mortality rate from 124 to 35 per 1,000 live births and the  
82 maternal mortality ratio from 437 to 170 per 100,000 live births.(15) Increased in facility  
83 deliveries and child vaccination programs have substantially reduced these maternal and child  
84 deaths during the Millennium Development Goals (MDGs) era.(16,17)

85 However, in order to achieve the health-related SDGs by 2030, maternal mortality must be  
86 reduced by an additional 60% and under-five mortality by an additional 30%. Using Global  
87 Burden of Disease data in 2016, Kruk et al found that deaths due to poor quality care were twice  
88 as high as deaths due to non-utilization of healthcare services in Cambodia.(18) Moreover,  
89 inequality in accessing maternal and child care services across geographic locations, urban-rural  
90 residents, and wealth quintile was observed in Cambodia.(19,20) To avert these additional  
91 maternal and child deaths, a high-quality equitable healthcare services is needed. The first step is  
92 to monitor progress during the MDG era.

93 To our knowledge, no study has assessed the effective, quality-adjusted, coverage of MCH  
94 services in Cambodia. Past research has mostly focused on the utilization of MCH services.(21–  
95 23) Thus, this study estimates the effective coverage of five MCH services and inequality in  
96 effective coverage using data from 2005 to 2014.

## 97 **Methods**

### 98 *Data sources*

99 This is a secondary statistical analysis using data from the Cambodia Demographic and Health  
100 Surveys (CDHS) to examine changes in crude coverage, effective coverage, and inequality in  
101 effective coverage of maternal and child health services over time. The three most recent waves  
102 – 2005, 2010, 2014 - of the CDHS were included. The CDHS is a nationally representative,  
103 population-based, cross-sectional survey carried out every 4 to 5 years.(15) Our population of  
104 interest (N) included all women of reproductive age (15-49 years old) who had at least one live  
105 birth in the past five years preceding each survey wave for maternal care, and all children under  
106 five years old living in residential households for sick childcare visits. The CDHS collects data  
107 on a wide range of health services including across the MCH continuum of care. Sampling  
108 strategies and methodology have been described elsewhere.(24)

### 109 *Measures*

#### 110 *Crude coverage*

111 Crude coverage was calculated by the proportion of women or children who needed health care  
112 (due to true or perceived needs) and who sought care at health facilities. We estimated crude  
113 coverage for five MCH services: antenatal care (ANC), delivery, and care for diarrhea,  
114 pneumonia, and fever. Antenatal care was defined as the proportion of women with at least one  
115 live birth in the five years preceding the survey who reported at least four ANC visits for their  
116 most recent birth. Delivery care was defined as the proportion of women who gave birth in the  
117 five years preceding the survey and who delivered at a health facility including all public and  
118 private facilities (excluding those who gave birth at home and undefined locations).

119 Care for diarrhea, pneumonia, and fever were defined, respectively, as the proportion of children  
120 who had diarrhea, symptoms of pneumonia (a cough accompanied by short, rapid breathing and  
121 difficulty breathing as a result of a problem in the chest), or fever, in the two weeks preceding  
122 the survey for whom advice or treatment was sought from a health facility including all public  
123 and private facilities except pharmacies and traditional healers.

#### 124 *Effective coverage*

125  
126 Based on the calculation used by Arsenault et al(7) and Hategeka et al(6), we estimated effective  
127 coverage as:

$$128 \quad EC = Q*U/N$$

129 Where *EC* is effective coverage, *Q* is quality of MCH services, *U* is utilization of MCH services,  
130 and *N* is need for MCH services. Since the CDHS had only a few indicators to estimate the  
131 quality of services, the effective coverage estimates reported in this study should be considered  
132 an upper limit of the quality of MCH services.



1  
2  
3  
4 133 Quality of care was defined based on four reports: the HQSS Commission's framework(4), the  
5 134 WHO recommendations on antenatal care for a positive pregnancy experience(25), the National  
6 135 Strategy for Reproductive and Sexual Health of Cambodia 2017-2020(26), and the WHO  
7 136 standards for improving the quality of care for children and young adolescents in health  
8 137 facilities.(27)

9  
10  
11 138 Quality-adjusted ANC was estimated by the proportion of women who received at least four  
12 139 ANC visits and reported receiving five basic services at any point during ANC: their blood  
13 140 pressure was measured, a urine and a blood sample were collected, they were given or bought  
14 141 iron tablets or syrup, and they were counseled on potential complications to look out for during  
15 142 pregnancy. Quality-adjusted delivery care was defined as the proportion of women who  
16 143 delivered at a health facility and who reported that someone examined them or asked questions  
17 144 about their health before being discharged. Quality-adjusted care for diarrhea was defined as the  
18 145 proportion of children who sought care at a health facility for diarrhea and who received oral  
19 146 rehydration therapy (ORT) from a special packet, pre-packaged or from a homemade fluid.  
20 147 Quality-adjusted care for pneumonia was defined as the proportion of children who visited a  
21 148 health facility for suspected pneumonia and who received antibiotics (pills, syrup or injection).  
22 149 Quality-adjusted care for fever was defined as children who sought care at a health facility and  
23 150 received a blood test for suspected malaria. Detailed indicator definitions are shown in  
24 151 **supplemental table 1.**

### 25 26 27 28 29 152 *Inequality in effective coverage of MCH services*

30 153 Inequalities in effective coverage of five MCH services was assessed using three measures of  
31 154 socioeconomic position: household wealth quintile, area of residence (urban vs. rural) and the  
32 155 woman's education level as provided by the CDHS.(15) The wealth index, provided by the  
33 156 CDHS, is calculated based on a household's ownership of selected assets, such as televisions and  
34 157 bicycles; housing construction materials; and types of water access and sanitation facilities.(28)  
35 158 The wealth index is divided into five quintiles (lowest – Q1, second – Q2, middle – Q3, fourth -  
36 159 Q4, and highest – Q5) based on a continuous scale of relative wealth in the country.(28) Details  
37 160 on the calculation of the wealth index can be found elsewhere.(29) The women's education was  
38 161 combined into three levels (no education, primary school only, and secondary or higher  
39 162 education).

### 40 41 42 43 44 163 *Statistical analysis*

45 164 We first used descriptive statistics to estimate crude coverage and effective coverage for the five  
46 165 MCH services in 2005, 2010 and 2014. Data for child pneumonia care was not available in 2005.  
47 166 Line graphs were used to present the trends in national averages over time for each health  
48 167 service. Second, we assessed inequalities in effective coverage visually using equiplots across  
49 168 wealth quintiles, maternal education, and area of residence (urban vs rural). Finally, we used risk  
50 169 ratios (RR), to compare effective coverage in 2014 between the top and bottom categories of  
51 170 each measure of socioeconomic position (wealth quintiles, education, and urban residence). We  
52 171 used logistic regressions to model the log odds of effective coverage and transformed the  
53 172 coefficients into marginal predicted risks using postestimation commands to calculate the risk

1  
2  
3  
4 173 ratio. We used the *logistic*, *margins*, and *nlcom* commands in STATA version 16.0.(30)  
5 174 Statistical code for RR calculation is publicly available on a GitHub repository:  
6 175 [https://github.com/mkkim1/RiskRatio\\_Cambodia.git](https://github.com/mkkim1/RiskRatio_Cambodia.git).

8  
9 176 Two additional sub-analyses were conducted. First, we estimated the crude and effective  
10 177 coverage in 2000 to observe the trend in the last two decades. However, due to the age of the  
11 178 data, we excluded the 2000 data from the main analysis (**supplemental table 2**). Indicators to  
12 179 estimate effective coverage for facility delivery and sick childcare for fever were not available in  
13 180 2000. Second, we used postpartum checkup after discharge to estimate effective coverage for  
14 181 childbirth and compare with the results from the main analysis (**supplemental table 3 and**  
15 182 **supplemental figure 1**).

16  
17  
18 183 All analyses, including logistic regressions, were adjusted for the survey design (clustering,  
19 184 stratification, and survey weights) except the equiplots due to a limitation of the statistical  
20 185 software package. Stata SE Version 16.0 was used for all analyses.

### 23 186 **Patient and public involvement**

24  
25 187 Patients and/or the public were not involved in the design, or conduct, or reporting, or  
26 188 dissemination plans of this research.

27  
28 189  
29  
30  
31  
32  
33  
34  
35  
36  
37  
38  
39  
40  
41  
42  
43  
44  
45  
46  
47  
48  
49  
50  
51  
52  
53  
54  
55  
56  
57  
58  
59  
60

## 190 Results

### 191 *Description of the study population*

192 A total of 53,155 women of reproductive age (15-49 years old) were included across the three  
193 survey waves. The proportion of women who gave birth within the 5 years preceding the survey  
194 slightly decreased from 34.9% in 2005 to 34.0% in 2014. Most women lived in rural areas and  
195 completed primary education (**table 1**). In total, 23,242 children under 5 years were included.  
196 Fever was the most prevalent child illness, with 27.1% of children suffering from fever in the  
197 two weeks prior to the survey in 2014 (**table 1**). High prevalence of fever could be explained by  
198 the high burden of malaria along the national borders including in the western provinces of  
199 Battambang and Pailin.

### 200 *Overall crude and effective coverage*

201 In 2014, average crude and effective coverage were 80.1% and 56.4%, respectively, for maternal  
202 health care (ANC and delivery), and 59.1% and 29.6% for sick child care (care for child  
203 diarrhea, pneumonia, and fever) (**table 1**). For maternal health, effective coverage increased by  
204 21.0% and 22.8% from 2005 to 2010 and 2010 to 2014, respectively (**table 1**). For sick  
205 childcare, effective coverage increased by 13.4% and 4.5% from 2005 to 2010 and 2010 to 2014,  
206 respectively (**table 1**). Estimates for crude and effective coverage for each indicator can be found  
207 in **supplemental table 2**. Delivery had the highest effective coverage at 80.1% in 2014  
208 (**supplemental table 2**). Meanwhile, effective coverage for fever had the lowest effective  
209 coverage at 2.3% in 2005 (**supplemental table 2**).

### 210 *Maternal health care*

211 **Figure 1** shows a continuous increase in crude and effective coverage for ANC and facility  
212 delivery from 2005 to 2014. In 2014, 80.1% of women who delivered at a facility had a postnatal  
213 check before being discharged and around half of women who had four ANC visits received the  
214 five basic services during their pregnancy. Effective coverage in maternal health care services  
215 improved even among the poorest. For example, in 2005 only 4.7% of women in the lowest  
216 wealth quintile received a postnatal check; while this increased to 60.9% in 2014 (**figure 2**). The  
217 proportion of women from rural areas who received the five basic services during ANC  
218 increased by 13-folds from 2005 to 2014, from 2.2% to 29.6% (**figure 2**). Inequalities also  
219 appeared to be reduced according to the equiplots. However, socioeconomic inequalities in  
220 effective coverage remained in 2014. Women in the richest wealth quintile in Cambodia were 1.7  
221 times more likely to receive all five services during ANC visits (RR = 1.7, 95% CI = 1.5, 2.0)  
222 compared to the poorest and they were 1.4 times more likely to receive a postnatal check before  
223 discharge (RR = 1.4, 95% CI = 1.4, 1.5) (**table 2**).

### 224 *Sick child care*

225 **Figure 3** shows the trend in crude and effective coverage for sick child care. Overall, crude and  
226 effective coverage for sick child care did not improve as much as for maternal care between 2005  
227 and 2014. The proportion of children with diarrhea who received ORS and the proportion with

1  
2  
3  
4 228 fever who received a malaria test remained almost the same between 2010 and 2014 (**figure 3**).  
5 229 The proportion of children who received ORS for diarrhea was higher in the poorest groups.

7 230 In 2014, children in the richest quintile were 0.6 times less likely to receive ORS when seeking  
8 231 care for diarrhea (RR = 0.6, 95% CI = 0.4, 0.9), compared to children from the poorest  
10 232 households (**figure 4 and table 2**). Similarly, children of most educated mothers were 0.5 times  
11 233 less likely to receive ORS for diarrhea (RR = 0.5, 95% CI = 0.3, 0.8) compared to those with no  
12 234 formal education (**table 2**).

14 235  
15  
16  
17  
18  
19  
20  
21  
22  
23  
24  
25  
26  
27  
28  
29  
30  
31  
32  
33  
34  
35  
36  
37  
38  
39  
40  
41  
42  
43  
44  
45  
46  
47  
48  
49  
50  
51  
52  
53  
54  
55  
56  
57  
58  
59  
60

For peer review only

**Table 1** - Characteristics of the study sample in Cambodia from 2005 to 2014.

| Survey, year                                                                    | 2005                  | 2010                  | 2014                  |
|---------------------------------------------------------------------------------|-----------------------|-----------------------|-----------------------|
|                                                                                 | N (%)                 | N (%)                 | N (%)                 |
| <b>Number of households</b>                                                     | 14243                 | 15667                 | 15825                 |
| <b>Women (age 15-49)</b>                                                        | 16823                 | 18754                 | 17578                 |
| Women who gave birth within 5 years of the survey                               | 5865 (34.9%)          | 6472 (34.5%)          | 5973 (34.0%)          |
| <b>Residence</b>                                                                |                       |                       |                       |
| Urban                                                                           | 2973 (17.7%)          | 3936 (21.0%)          | 3251 (18.5%)          |
| Rural                                                                           | 13851 (82.3%)         | 14819 (79.0%)         | 14328 (81.5%)         |
| <b>Education</b>                                                                |                       |                       |                       |
| No education                                                                    | 3270 (19.4%)          | 2974 (15.9%)          | 2251 (12.8%)          |
| Primary                                                                         | 9389 (55.8%)          | 9265 (49.4%)          | 8281 (47.1%)          |
| Secondary and higher                                                            | 4165 (24.8%)          | 6516 (34.7%)          | 7047 (40.1%)          |
| <b>Wealth quintile</b>                                                          |                       |                       |                       |
| Lowest                                                                          | 3018 (17.9%)          | 3389 (18.1%)          | 3144 (17.9%)          |
| Second                                                                          | 3165 (18.8%)          | 3517 (18.7%)          | 3314 (18.9%)          |
| Middle                                                                          | 3246 (19.3%)          | 3595 (19.2%)          | 3381 (19.2%)          |
| Fourth                                                                          | 3308 (19.7%)          | 3827 (20.4%)          | 3613 (20.6%)          |
| Highest                                                                         | 4089 (24.3%)          | 4429 (23.6%)          | 4128 (23.5%)          |
| <b>Maternal health care</b>                                                     |                       |                       |                       |
| Crude coverage of antenatal care and facility delivery (mean, range)            | 25.1% (23.2%-27.0%)   | 58.1% (56.8% – 59.4%) | 80.1% (75.6% – 84.6%) |
| Effective coverage of antenatal care and facility delivery (mean, range)        | 12.6% (4.7% – 20.5%)  | 33.6% (16.2% – 51.1%) | 56.4% (32.8% – 80.1%) |
| <b>Children (age &lt;5)</b>                                                     | 7789                  | 8200                  | 7253                  |
| Children who had diarrhea 2 weeks prior to the survey                           | 1420 (18.2%)          | 1161 (14.2%)          | 902 (12.4%)           |
| Children who had pneumonia 2 weeks prior to the survey                          | 2224 (28.6%)          | 1741 (21.2%)          | 1531 (21.1%)          |
| Children who had fever 2 weeks prior to the survey                              | 2576 (33.1%)          | 2194 (26.8%)          | 1968 (27.1%)          |
| <b>Care for sick children</b>                                                   |                       |                       |                       |
| Crude coverage of diarrhea, pneumonia, and fever (mean, range)                  | 45.3% (41.1% – 47.8%) | 69.1% (58.9% – 75.5%) | 59.1% (55.5% – 61.3%) |
| Effective coverage of diarrhea, pneumonia, and fever (mean, range) <sup>a</sup> | 11.7% (2.3% – 21.1%)  | 25.1% (10.3% – 37.3%) | 29.6% (11.5% – 51.5%) |

<sup>a</sup>Effective coverage for pneumonia in 2005 was not included due to missing data in CDHS.

236

237

238 **Table 2.** Risk ratios in effective coverage of five maternal and child health services between richest and poorest, least and most  
 239 educated and urban vs. rural residents, Cambodia Demographic and Health Survey 2014

| Indicators                                  | Wealth quintile (Q5 vs. Q1) |             | Urban-rural area |             | Women’s education levels (Secondary or higher education vs. no education) |             |
|---------------------------------------------|-----------------------------|-------------|------------------|-------------|---------------------------------------------------------------------------|-------------|
|                                             | RR                          | (95% CI)    | RR               | (95% CI)    | RR                                                                        | (95% CI)    |
| Received 5 basic services during ANC visits | 1.7***                      | (1.5 - 2.0) | 1.5***           | (1.3 – 1.6) | 1.9***                                                                    | (1.6 – 2.2) |
| Postnatal check before discharge            | 1.4***                      | (1.4 - 1.5) | 1.2***           | (1.2 – 1.2) | 1.4***                                                                    | (1.3 – 1.5) |
| Oral solution received for diarrhea         | 0.6*                        | (0.4 – 0.9) | 0.8              | (0.5 – 1.2) | 0.5**                                                                     | (0.3 – 0.8) |
| Antibiotics received for pneumonia          | 0.9                         | (0.8 – 1.1) | 0.8*             | (0.7 – 0.9) | 1.0                                                                       | (0.8 – 1.2) |
| Blood tested for malaria                    | 0.8                         | (0.5 – 1.1) | 0.8              | (0.6 – 1.2) | 1.3                                                                       | (0.8 – 2.0) |

240 Note: P<0.001\*\*\*, P<0.01\*\*, and P<0.05\*. RR = Risk Ratio, CI = Confidence Interval; The RR is the ratio in effective coverage between top and bottom sub-groups:  
 241 socioeconomic status – wealthiest quintile vs poorest quintile; urban and rural areas; and secondary or higher education vs. no education. RR>1 indicates pro-rich distribution  
 242 (higher effective coverage in the top group); RR<1 indicates pro-poor distribution (higher effective coverage in the lower sub-groups; RR=1 suggest an equal distribution in the  
 243 effective coverage indicator.

244

## 245 Discussion

246 In this study, we estimated crude coverage, effective coverage, and inequality in effective  
247 coverage for five MCH services to assess progress in improving quality of health care in  
248 Cambodia from 2005 to 2014. We found that improvements in effective coverage were greater  
249 for maternal health services (ANC and facility delivery), than for curative services for sick  
250 children (diarrhea, pneumonia, and fever). Vulnerable women, including the poor, rural  
251 residents, and less educated, experienced a greater improvement in effective coverage for facility  
252 delivery than ANC. Inequality gaps appeared to have been reversed for diarrhea and pneumonia  
253 over time, where children from rural and poorer households received higher quality care than  
254 children from urban households.

255 Effective coverage in sick child care did not improve as much as for maternal health services.  
256 We also found a pro-poor distribution for sick child care – children from the poorest, less  
257 educated households and from rural areas, appeared to be more likely to receive ORS for  
258 diarrhea and antibiotics for pneumonia, than children from richer, more educated households and  
259 urban areas. This could be because poorer children were relatively sicker but may also point to  
260 differences in quality between the types of providers used. Most curative care in Cambodia is  
261 delivered by an extensive network of loosely regulated private health-care providers while the  
262 public sector is the predominant provider of preventive care and health promotion  
263 activities.(14,31) According to the 2014 CDHS, 65% of care for child diarrhea, fever or cough  
264 took place in the private sector.(15) Private providers – mostly small practices, pharmacies or  
265 single-person practitioners - are also more prevalent in urban areas.(14) The regulation of private  
266 providers in Cambodia remains a challenge where many operate without government  
267 accreditation.(14) The Cambodia National Strategic Plan 2017-2020 revealed inadequate  
268 education of health professionals as an important impediment to improving the quality of health  
269 services.(32) Since our results may point to large quality gaps in the private sector, the  
270 Cambodian government should regulate private healthcare providers for their curative clinical  
271 practice to ensure that patients receive quality care.

272 The increase in care seeking among poorer households could also have been influenced by the  
273 Health Equity Fund (HEF). The HEF, launched in 2000, is Cambodia's largest financial  
274 protection scheme, covering the poorest one-fifth of the national population and aims to increase  
275 access to government health facilities.(33) Since then, the utilization of maternal and child health  
276 services significantly increased among HEF-supported patients, particularly the facility  
277 deliveries.(15,34) Yet, only 1 in 2 children received proper treatments at facilities. Only half of  
278 women received all five basic health services during their ANC visits.

279 From 2005 to 2014, the proportion of women who delivered at health facilities quadrupled.  
280 During the MDG era, several programs have focused on improving maternal and newborn health  
281 including those led by the national government and international aid agencies, including the  
282 Korea Foundation for International Healthcare (KOFIH). Since 2013, KOFIH has implemented



1  
2  
3  
4 283 an integrated MCH program to improve the quality of maternal and child healthcare services in  
5 284 the Battambang province by training healthcare workers - upgrading the skills of new midwives  
6 285 and training on partograph.(35) The Government Midwifery Incentive Scheme started in 2006  
7 286 aimed to increase the facility deliveries by paying midwives and other trained health personnel  
8 287 with cash incentives based on the number of live births they attend in public health facilities.(36)  
9 288 These programs may have been effective in improving both the utilization and quality of delivery  
10 289 care. According to the 2014 CDHS report, 69% of deliveries took place in the public sector and  
11 290 85.8% of births were attended by a midwife or a doctor.(15) Nonetheless, we found a large gap  
12 291 in postpartum care before and after discharge which highlights missed opportunities for high-  
13 292 quality delivery care (**supplemental table 3 and supplemental figure 1**). A meta-analysis found  
14 293 that receiving antenatal to postnatal care could reduce the risk of combined neonatal, perinatal,  
15 294 and maternal mortality by 15%.(37) The National Strategy for Reproductive and Sexual Health  
16 295 in 2017-2020 recommends four postnatal checks, one before and three after discharge.(26)  
17 296 Despite these recommendations, mothers rarely return to the facilities after they get discharged.  
18 297 Inadequate transportation and long distances to health facilities might discourage women to  
19 298 return to the facilities after getting discharged. More outreach efforts like home visits, promotion  
20 299 of postnatal care during the antenatal period and at delivery are needed to ensure a continuum of  
21 300 delivery care for both mothers and newborns.

22  
23  
24  
25  
26  
27 301 We found the largest difference (65.1%) between crude and effective coverage for children with  
28 302 fever in 2010. Effective coverage (blood test for suspected malaria) only improved by 1.1% from  
29 303 2010 to 2014. This small increase in coverage might have resulted in a dramatic reduction in  
30 304 malaria related deaths in Cambodia. In 2018, no malaria related deaths was reported for the first  
31 305 time in the country's history.(38) The percentage of malaria cases significantly fell from 61% in  
32 306 2015 to 27% in 2018.(38) This promising improvement could have reduced the number of blood  
33 307 tests for suspected malaria cases.

34  
35  
36  
37 308 Effective coverage lags behind crude coverage in Cambodia, indicating a need for improving the  
38 309 quality of MCH care. Similar or even lower levels of effective coverage have been found in other  
39 310 countries. Across 91 LMICs, effective coverage for ANC ranged from 53.8% on average in low-  
40 311 income countries, to 93.3% in upper-middle-income countries.(7) In Rwanda, only 40.2% of  
41 312 women who gave birth in a facility in 2015 received a check-up before discharge while this  
42 313 estimate was almost the double (80.1%) in Cambodia.(6) Quality-adjusted coverage for ANC  
43 314 (women who had at least 4 ANC visits and received at least 11 quality focuses intervention  
44 315 items) was about a half in Myanmar (14.6%) compared to Cambodia (32.8%).(39) In Haiti, an  
45 316 average effective coverage for curative sick childcare, including taking history, testing, and  
46 317 managing care, was 11.8% in 2013 while this estimate was almost tripled (29.7%) in  
47 318 Cambodia.(11) Leslie et al found that effective coverage, providers' adherence to evidence-based  
48 319 care guidelines, for sick childcare was 37% in 8 LMICs between 2007 and 2015.(40) About 3 in  
49 320 10 children received ORS in Vietnam (30.0%) and Cambodia (26.0%) in 2014.(41)

50  
51  
52  
53 321 This study includes several limitations. First, the quality measures are not inclusive as they  
54 322 included only a limited number of recommended items that should be completed during MCH  
55 323 services. For instance, effective coverage for childbirth included only one item: checkup before



1  
2  
3  
4 324 discharge. Many other components of care are required for high-quality delivery care included a  
5 325 positive user experience (respectful, patient-centered delivery care) and high-quality intrapartum  
6 326 technical care. In addition, quality for sick child care was measured by whether the child  
7 327 received an appropriate treatment (ORS for diarrhea, antibiotics for suspected pneumonia, and  
8 328 blood test for suspected malaria) but the survey did not ask whether the healthcare providers  
9 329 explained the proper treatment instructions to the caregivers or conveyed their diagnosis. Given  
10 330 these limited measures, our quality estimates should be regarded as an upper bound of quality, a  
11 331 starting point for estimating quality-adjusted coverage rather than a definite estimate. Thus,  
12 332 better quality measures - user experience, competent care, and timeliness of care - are needed.  
13 333 More studies need to go beyond utilization of care and investigate health system quality.

14  
15  
16  
17 334 Second, although we included the most recent CDHS surveys, our latest data points are from  
18 335 2014. The CDHS announced an upcoming 2020-21 survey.(42) The Global Financing Facility  
19 336 estimated that service disruptions during the COVID-19 pandemic could have the potential to  
20 337 leave 313,900 children without oral antibiotics for pneumonia and 77,600 women without access  
21 338 to facility deliveries.(43) In Laos, antenatal care and postnatal care declined by an estimated 10%  
22 339 and 9%, respectively, immediately after the declaration of the pandemic.(44) Future studies  
23 340 should estimate the effect of the COVID-19 pandemic on effective coverage in Cambodia.

24  
25  
26  
27 341 Third, DHS data is self-reported by caregivers which is subject to recall bias. Women tend to  
28 342 report less accurately about care related to more complex diseases such as pneumonia (45) but  
29 343 they report better for more invasive procedures such as a blood test. (46) To address reporting  
30 344 biases, other studies on quality of care have linked household surveys with facility  
31 345 assessments.(47) In 2008, Cambodia implemented the Service Availability and Readiness  
32 346 Assessment (SARA), a national health facility assessment.(48) Future studies should try to link  
33 347 different types of surveys to provide a more comprehensive picture of health system quality in  
34 348 Cambodia. Fourth, the findings are applicable only to the study country.

## 39 349 **Conclusion**

40  
41 350 Despite the substantial improvement in maternal and child outcomes in the past decades in  
42 351 Cambodia, efforts are needed to improve quality of care. As Cambodia strives to meet the health-  
43 352 related SDGs by 2030, focusing on effective coverage will be important more than ever to  
44 353 address the residual maternal and child mortality. Additionally, inequalities across  
45 354 socioeconomic status need to be addressed to achieve equitable quality healthcare. Our study  
46 355 recommends policies to improve regulation and quality improvement efforts among the private  
47 356 sector where curative services for sick childcare are often provided. To our knowledge, this is the  
48 357 first study providing sound evidence of the quality of care in Cambodia over time. Health system  
49 358 strengthening efforts need to go beyond just improving the utilization of care and start focusing  
50 359 on the content of care and patients' experience. The COVID-19 pandemic has shown the need  
51 360 for resilient, high-quality health systems more than ever. Thus, Cambodia needs to seize this  
52 361 moment to shift its attention and funding towards building a high-quality health system.

1  
2  
3  
4 362 **Funding**  
5

6 363 This study was supported by the Korea Foundation for International Healthcare. Award/Grant  
7 364 number: N/A

9 365 **Competing interests**  
10

11 366 The authors declare that they have no competing interests.  
12

13 367 **Contributions**  
14

15 368 MKK, SEK, CA were involved in the conceptualization and interpretation of findings and helped  
16 369 draft the manuscript. MKK and SAK conducted data analysis. JHW and CEK helped draft the  
17 370 manuscript.  
18

19 371 **Patient consent for publication**  
20

21 372 Not required  
22

23 373 **Ethics approval**  
24

25 374 Since this study uses publicly available data, an ethical approval was not needed. The original  
26 375 survey implemented obtained ethical approvals for data collection; the Demographic and Health  
27 376 Surveys Program (<https://dhsprogram.com/data/available-datasets.cfm>) approved our data access  
28 377 request to conduct the study.  
29  
30

31 378 **Data sharing statement**  
32

33 379 Data are available upon reasonable request. The data on the selected maternal and child health  
34 380 indicators were taken from the women's and children's questionnaire of the DHS surveys, and  
35 381 the data set is available on request after registering as a user (<https://dhsprogram.com/Data/>).  
36  
37  
38  
39 383  
40  
41  
42  
43  
44  
45  
46  
47  
48  
49  
50  
51  
52  
53  
54  
55  
56  
57  
58  
59  
60

## 384 References

- 385 1. United Nations. The Sustainable Development Goals Report 2016 [Internet]. New York; 2016. Available  
386 from: [https://nacoesunidas.org/wp-](https://nacoesunidas.org/wp-content/uploads/2016/07/The_Sustainable_Development_Goals_Report_2016.pdf)  
387 [content/uploads/2016/07/The\\_Sustainable\\_Development\\_Goals\\_Report\\_2016.pdf](https://nacoesunidas.org/wp-content/uploads/2016/07/The_Sustainable_Development_Goals_Report_2016.pdf)
- 388 2. Kruk ME, Chukwuma A, Mbaruku G, Leslie HH. Variation in quality of primary-care services in Kenya,  
389 Malawi, Namibia, Rwanda, Senegal, Uganda and the United Republic of Tanzania. *Bull World Health*  
390 *Organ.* 2017 Jun 1;95(6):408–18.
- 391 3. Kruk ME, Leslie HH, Verguet S, Mbaruku GM, Adanu RMK, Langer A. Quality of basic maternal care  
392 functions in health facilities of five African countries: an analysis of national health system surveys.  
393 *Lancet Glob Health.* 2016 Nov 1;4(11):e845–55.
- 394 4. Kruk ME, Gage AD, Arsenault C, Jordan K, Leslie HH, Roder-DeWan S, et al. High-quality health  
395 systems in the Sustainable Development Goals era: time for a revolution. *Lancet Glob Health.* 2018 Nov  
396 1;6(11):e1196–252.
- 397 5. Gage AD, Leslie HH, Bitton A, Jerome JG, Thermidor R, Joseph JP, et al. Assessing the quality of  
398 primary care in Haiti. *Bull World Health Organ.* 2017 Mar 1;95(3):182–90.
- 399 6. Hategeka C, Arsenault C, Kruk ME. Temporal trends in coverage, quality and equity of maternal and  
400 child health services in Rwanda, 2000–2015. *BMJ Glob Health.* 2020 Nov 1;5(11):e002768.
- 401 7. Arsenault C, Jordan K, Lee D, Dinsa G, Manzi F, Marchant T, et al. Equity in antenatal care quality: an  
402 analysis of 91 national household surveys. *Lancet Glob Health.* 2018 Nov 1;6(11):e1186–95.
- 403 8. Nguyen PH, Khuong LQ, Pramanik P, Billah SM, Menon P, Piwoz E, et al. Effective coverage of  
404 nutrition interventions across the continuum of care in Bangladesh: insights from nationwide cross-  
405 sectional household and health facility surveys. *BMJ Open.* 2021 Jan 20;11(1):e040109.
- 406 9. Amouzou A, Leslie HH, Ram M, Fox M, Jiwani SS, Requejo J, et al. Advances in the measurement of  
407 coverage for RMNCH and nutrition: from contact to effective coverage. *BMJ Glob Health.* 2019 May  
408 1;4(Suppl 4):e001297.
- 409 10. Marsh AD, Muzigaba M, Diaz T, Requejo J, Jackson D, Chou D, et al. Effective coverage measurement in  
410 maternal, newborn, child, and adolescent health and nutrition: progress, future prospects, and implications  
411 for quality health systems. *Lancet Glob Health.* 2020 May 1;8(5):e730–6.
- 412 11. Leslie HH, Malata A, Ndiaye Y, Kruk ME. Effective coverage of primary care services in eight high-  
413 mortality countries. *BMJ Glob Health.* 2017;2(3):e000424.
- 414 12. Wang W, Mallick L, Allen C, Pullum T. Effective coverage of facility delivery in Bangladesh, Haiti,  
415 Malawi, Nepal, Senegal, and Tanzania. *PLOS ONE.* 2019 Jun 11;14(6):e0217853.
- 416 13. World Bank Group. World Bank Open Data | Data [Internet]. [cited 2022 Jan 2]. Available from:  
417 <https://data.worldbank.org/>
- 418 14. World Health Organization. Regional Office for the Western Pacific. The Kingdom of Cambodia health  
419 system review [Internet]. WHO Regional Office for the Western Pacific; 2015 [cited 2022 Jan 2]. xxxii,  
420 178 p. Available from: <https://apps.who.int/iris/handle/10665/208213>

- 1  
2  
3  
4 421 15. Statistics/Cambodia NI of, Health/Cambodia DG for, International ICF. Cambodia Demographic and  
5 422 Health Survey 2014. 2015 Sep 1 [cited 2021 Nov 5]; Available from:  
6 423 <https://dhsprogram.com/publications/publication-fr312-dhs-final-reports.cfm>  
7
- 8 424 16. Pierce H. Increasing health facility deliveries in Cambodia and its influence on child health. *Int J Equity*  
9 425 *Health*. 2019 May 14;18(1):67.
- 10  
11 426 17. Liljestrand J, Sambath MR. Socio-economic improvements and health system strengthening of maternity  
12 427 care are contributing to maternal mortality reduction in Cambodia. *Reprod Health Matters*. 2012 Jan  
13 428 1;20(39):62–72.
- 14  
15 429 18. Kruk ME, Gage AD, Joseph NT, Danaei G, García-Saisó S, Salomon JA. Mortality due to low-quality  
16 430 health systems in the universal health coverage era: a systematic analysis of amenable deaths in 137  
17 431 countries. *The Lancet* [Internet]. 2018 Sep [cited 2018 Sep 11]; Available from:  
18 432 <https://linkinghub.elsevier.com/retrieve/pii/S0140673618316684>  
19
- 20 433 19. Jimenez-Soto E, Durham J, Hodge A. Entrenched Geographical and Socioeconomic Disparities in Child  
21 434 Mortality: Trends in Absolute and Relative Inequalities in Cambodia. *PLOS ONE*. 2014 Oct  
22 435 8;9(10):e109044.
- 23  
24 436 20. Hong R, Them R. Inequality in Access to Health Care in Cambodia: Socioeconomically Disadvantaged  
25 437 Women Giving Birth at Home Assisted by Unskilled Birth Attendants. *Asia Pac J Public Health*. 2015  
26 438 Mar 1;27(2):NP1039–49.
- 27  
28 439 21. Wang W, Hong R. Levels and determinants of continuum of care for maternal and newborn health in  
29 440 Cambodia-evidence from a population-based survey. *BMC Pregnancy Childbirth*. 2015 Mar 19;15:62.
- 30  
31 441 22. Chomat AM, Grundy J, Oum S, Bermudez OI. Determinants of utilisation of intrapartum obstetric care  
32 442 services in Cambodia, and gaps in coverage. *Glob Public Health*. 2011;6(8):890–905.
- 33  
34 443 23. Chham S, Radovich E, Buffel V, Ir P, Wouters E. Determinants of the continuum of maternal health care  
35 444 in Cambodia: an analysis of the Cambodia demographic health survey 2014. *BMC Pregnancy Childbirth*.  
36 445 2021 Jun 2;21(1):410.
- 37  
38 446 24. Rutstein SO, Rojas G. *Guide to DHS Statistics*. :171.
- 39  
40 447 25. World Health Organization. WHO recommendations on antenatal care for a positive pregnancy  
41 448 experience. 2016.
- 42  
43 449 26. MoH/UNFPA. National Strategy for Reproductive and Sexual Health in Cambodia, 2017-2020 [Internet].  
44 450 2017 p. 64. Available from: [https://cambodia.unfpa.org/en/publications/national-strategy-reproductive-](https://cambodia.unfpa.org/en/publications/national-strategy-reproductive-and-sexual-health-cambodia-2017-2020)  
45 451 [and-sexual-health-cambodia-2017-2020](https://cambodia.unfpa.org/en/publications/national-strategy-reproductive-and-sexual-health-cambodia-2017-2020)
- 46  
47 452 27. World Health Organization. Standards for improving the quality of care for children and young  
48 453 adolescents in health facilities. 2018.
- 49  
50 454 28. USAID. Standard Recode Manual for DHS 6 [Internet]. MEASURE DHS/ICF International; 2013 [cited  
51 455 2021 Nov 22]. Available from: [https://dhsprogram.com/publications/publication-dhsg4-dhs-](https://dhsprogram.com/publications/publication-dhsg4-dhs-questionnaires-and-manuals.cfm)  
52 456 [questionnaires-and-manuals.cfm](https://dhsprogram.com/publications/publication-dhsg4-dhs-questionnaires-and-manuals.cfm)
- 53  
54 457 29. Rutstein SO, Johnson K. The DHS wealth index. 2004 Aug 1 [cited 2022 Apr 22]; Available from:  
55 458 <https://dhsprogram.com/publications/publication-cr6-comparative-reports.cfm>  
56  
57  
58  
59  
60

- 1  
2  
3  
4 459 30. Cummings P. Estimating Adjusted Risk Ratios for Matched and Unmatched Data: An Update. *Stata J*.  
5 460 2011 Jul 1;11:290–8.
- 6  
7 461 31. Arsenault C, Kim MK, Aryal A, Faye A, Joseph JP, Kassa M, et al. Hospital-provision of essential  
8 462 primary care in 56 countries: determinants and quality. *Bull World Health Organ*. 2020 Nov 1;98(11):735-  
9 463 746D.
- 10  
11 464 32. Department of Planning & Health Information. The Third Health Strategic Plan 2016-2020 (HSP3)  
12 465 [Internet]. 2016 May. Available from: [http://hismohcambodia.org/public/fileupload/carousel/HSP3-\(2016-](http://hismohcambodia.org/public/fileupload/carousel/HSP3-(2016-2020).pdf)  
13 466 [2020\).pdf](http://hismohcambodia.org/public/fileupload/carousel/HSP3-(2016-2020).pdf)
- 14  
15 467 33. Annear PL, Lee JT, Khim K, Ir P, Moscoe E, Jordanwood T, et al. Protecting the poor? Impact of the  
16 468 national health equity fund on utilization of government health services in Cambodia, 2006-2013. *BMJ*  
17 469 *Glob Health*. 2019 Nov 1;4(6):e001679.
- 18  
19 470 34. Kaba MW, Baesel K, Poch B, Bun S, Cerceau S, Bury L, et al. IDPoor: a poverty identification  
20 471 programme that enables collaboration across sectors for maternal and child health in Cambodia. *BMJ*.  
21 472 2018 Dec 7;363:k4698.
- 22  
23 473 35. Lee HY, Heo J, Koh H. Effect of a comprehensive program on maternal and child healthcare service in  
24 474 Battambang, Cambodia: A multivariate difference-in-difference analysis. *J Glob Health Sci* [Internet].  
25 475 2019 May 27 [cited 2021 Dec 16];1(1). Available from: <https://doi.org/10.35500/jghs.2019.1.e2>
- 26  
27 476 36. Ir P, Korachais C, Chheng K, Horemans D, Van Damme W, Meessen B. Boosting facility deliveries with  
28 477 results-based financing: a mixed-methods evaluation of the government midwifery incentive scheme in  
29 478 Cambodia. *BMC Pregnancy Childbirth*. 2015 Aug 15;15(1):170.
- 30  
31 479 37. Kikuchi K, Ansah EK, Okawa S, Enuameh Y, Yasuoka J, Nanishi K, et al. Effective Linkages of  
32 480 Continuum of Care for Improving Neonatal, Perinatal, and Maternal Mortality: A Systematic Review and  
33 481 Meta-Analysis. *PLOS ONE*. 2015 Sep 30;10(9):e0139288.
- 34  
35 482 38. World Health Organization. World malaria report. Geneva; 2019.
- 36  
37 483 39. Okawa S, Win HH, Leslie HH, Nanishi K, Shibnuma A, Aye PP, et al. Quality gap in maternal and  
38 484 newborn healthcare: a cross-sectional study in Myanmar. *BMJ Glob Health*. 2019 Mar 1;4(2):e001078.
- 39  
40 485 40. Leslie HH, Sun Z, Kruk ME. Association between infrastructure and observed quality of care in 4  
41 486 healthcare services: A cross-sectional study of 4,300 facilities in 8 countries. *PLOS Med*. 2017 Dec  
42 487 12;14(12):e1002464.
- 43  
44 488 41. Nguyen PT, Rahman MS, Le PM, Nguyen HV, Vu KD, Nguyen HL, et al. Trends in, projections of, and  
45 489 inequalities in reproductive, maternal, newborn and child health service coverage in Vietnam 2000-2030:  
46 490 A Bayesian analysis at national and sub-national levels. *Lancet Reg Health West Pac*. 2021  
47 491 Oct;15:100230.
- 48  
49 492 42. The DHS Program - Cambodia: Standard DHS, 2021 [Internet]. [cited 2021 Nov 26]. Available from:  
50 493 <https://dhsprogram.com/methodology/survey/survey-display-558.cfm>
- 51  
52 494 43. Global Financing Facility. Preserve Essential Health Services During the Covid-19 Pandemic Cambodia  
53 495 [Internet]. Available from:  
54 496 [https://www.globalfinancingfacility.org/sites/gff\\_new/files/documents/Cambodia-Covid-Brief\\_GFF.pdf](https://www.globalfinancingfacility.org/sites/gff_new/files/documents/Cambodia-Covid-Brief_GFF.pdf)

- 1  
2  
3  
4 497 44. Arsenault C, Gage A, Kim MK, Kapoor NR, Akweongo P, Amponsah F, et al. COVID-19 and resilience  
5 498 of healthcare systems in ten countries. *Nat Med*. 2022 Mar 14;1–11.  
6  
7 499 45. Hazir T, Begum K, El Arifeen S, Khan AM, Huque MH, Kazmi N, et al. Measuring coverage in MNCH: a  
8 500 prospective validation study in Pakistan and Bangladesh on measuring correct treatment of childhood  
9 501 pneumonia. *PLoS Med*. 2013;10(5):e1001422.  
10  
11 502 46. Stanton CK, Rawlins B, Drake M, dos Anjos M, Cantor D, Chongo L, et al. Measuring Coverage in  
12 503 MNCH: Testing the Validity of Women’s Self-Report of Key Maternal and Newborn Health Interventions  
13 504 during the Peripartum Period in Mozambique. *PLoS ONE*. 2013 May 7;8(5):e60694.  
14  
15 505 47. Bryce J, Arnold F, Blanc A, Hancioglu A, Newby H, Requejo J, et al. Measuring Coverage in MNCH:  
16 506 New Findings, New Strategies, and Recommendations for Action. *PLOS Med*. 2013 May  
17 507 7;10(5):e1001423.  
18  
19 508 48. O’Neill K, Takane M, Sheffel A, Abou-Zahr C, Boerma T. Monitoring service delivery for universal  
20 509 health coverage: the Service Availability and Readiness Assessment. *Bull World Health Organ*. 2013 Dec  
21 510 1;91(12):923–31.  
22

23 511  
24

25 **Figure Legend:**

26 512

27 513  
28 514 Figure 1 – Line graphs

29 515

30 516 Figure 2 – Equiplots

31 517

32 518 Figure 3 – Line graphs

33 519

34 520 Figure 4 – Equiplots  
35  
36  
37  
38  
39  
40  
41  
42  
43  
44  
45  
46  
47  
48  
49  
50  
51  
52  
53  
54  
55  
56  
57  
58  
59  
60

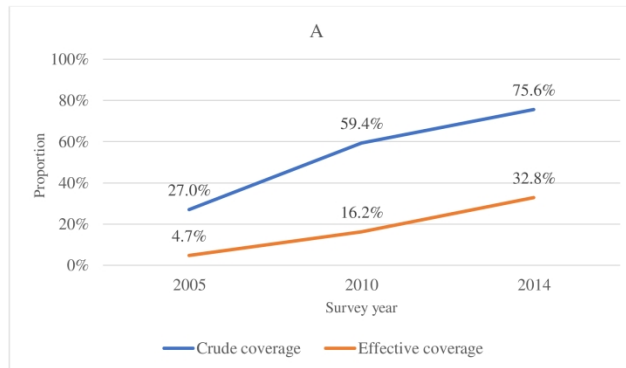

**A. Antenatal care (at least four visits)**

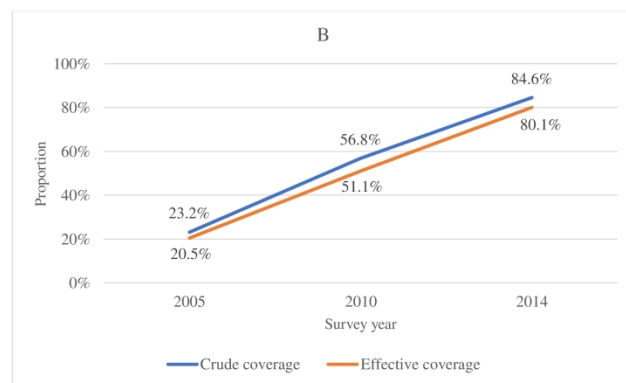

**B. Facility delivery**

**Figure 1.** Crude and effective coverage of maternal health care in Cambodia from 2005 to 2014. (A) at least 4 antenatal care (ANC) visits; (B) facility delivery.

Footnote: Effective coverage for antenatal care was estimated by the proportion of women who received at least four ANC visits and reported receiving five basic services at any point during ANC: their blood pressure was measured, a urine and a blood sample was collected, they were given or bought iron tablets or syrup, and they were counseled on potential complications to look out for during pregnancy. Effective coverage for facility delivery was defined as the proportion of women who delivered at a health facility and who reported that someone examined them or asked questions about their health before being discharged.

1

Figure 1 - Line graphs

215x279mm (300 x 300 DPI)



1  
2  
3  
4  
5  
6  
7  
8  
9  
10  
11  
12  
13  
14  
15  
16  
17  
18  
19  
20  
21  
22  
23  
24  
25  
26  
27  
28  
29  
30  
31  
32  
33  
34  
35  
36  
37  
38  
39  
40  
41  
42  
43  
44  
45  
46  
47  
48  
49  
50  
51  
52  
53  
54  
55  
56  
57  
58  
59  
60

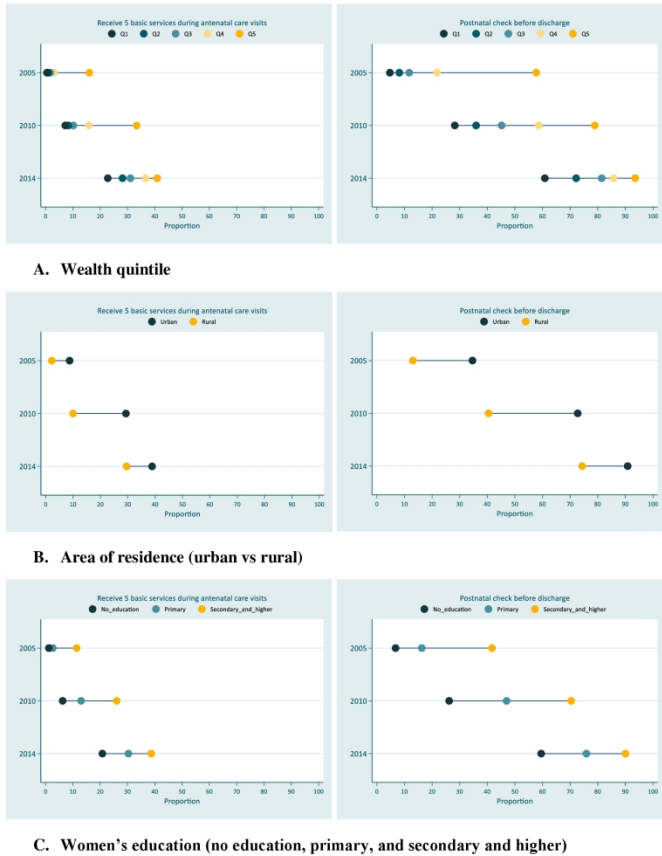

**Figure 2.** Equity in effective coverage of maternal health in Cambodia from 2005 to 2014 across 1) wealth quintile 2) area of residence (urban vs rural) 3) women's education (no education, primary, and secondary and higher)

1

Figure 2 - Equiplots

215x279mm (300 x 300 DPI)





**Figure 3.** Crude and effective coverage of care for child health in Cambodia from 2005 to 2014. (A) diarrhea; (B) pneumonia; (C) fever.  
 Footnote: Data for effective coverage of pneumonia in 2005 were missing. Effective coverage for diarrhea was defined as the proportion of children who sought care at a health facility for diarrhea and who received oral rehydration therapy (ORT) from a special packet, pre-packaged or from a homemade fluid. Effective coverage for pneumonia was defined as the proportion of children who visited a health facility for pneumonia and who received antibiotics (pills, syrup, or injection). Effective coverage for fever was defined as children who sought care at a health facility and received a blood test for suspected malaria.

1

Figure 3 - Line graphs

279x215mm (300 x 300 DPI)

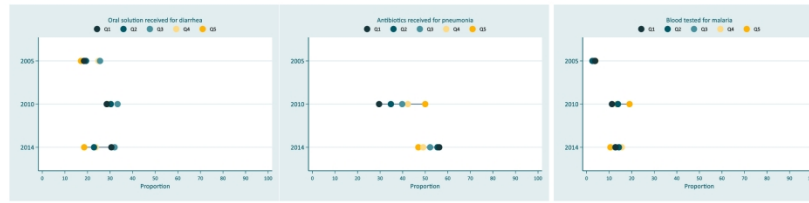

A. Wealth quintile

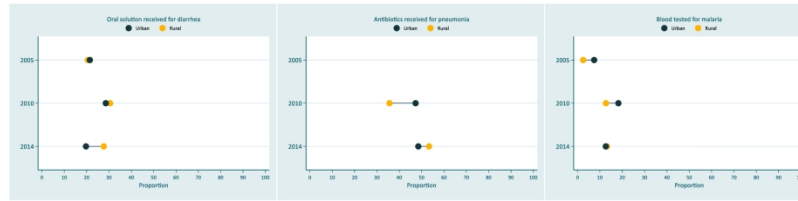

B. Area of residence (urban vs rural)

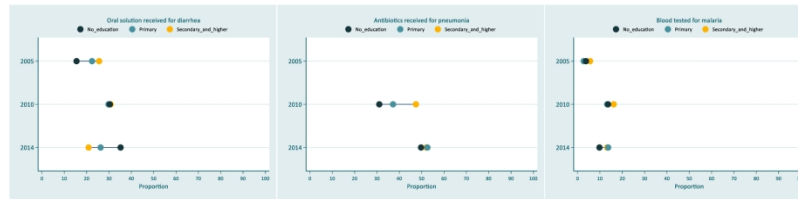

C. Women's education (no education, primary, and secondary and higher)

**Figure 4.** Equity in effective coverage of child health in Cambodia from 2005 to 2014 across 1) wealth quintile 2) area of residence (urban vs rural) 3) women's education (no education, primary, and secondary and higher).

Footnote: Data for effective coverage of pneumonia in 2005 were missing.

1

Figure 4 - Equiplots

215x279mm (300 x 300 DPI)

## Supplementary file – second round

### Measuring effective coverage of maternal and child health services in Cambodia: a retrospective analysis of Demographic and Health Surveys from 2005 to 2014

Min Kyung Kim, Soon Ae Kim, Ju Hwan Oh, Chae Eun Kim, Catherine Arsenault

**Supplemental table 1.** Indicator definitions and measurement strategy for crude coverage, effective coverage, and inequality, Cambodia Demographic Health Surveys

| Indicators                                                                                                                                                                                                                                                                                                                                                  | Type   | Measurement                                    | DHS measurement                                                                                                                                                                                                                                                                                                                                                                                                                                                                 |
|-------------------------------------------------------------------------------------------------------------------------------------------------------------------------------------------------------------------------------------------------------------------------------------------------------------------------------------------------------------|--------|------------------------------------------------|---------------------------------------------------------------------------------------------------------------------------------------------------------------------------------------------------------------------------------------------------------------------------------------------------------------------------------------------------------------------------------------------------------------------------------------------------------------------------------|
| <b>OUTCOME VARIABLES</b>                                                                                                                                                                                                                                                                                                                                    |        |                                                |                                                                                                                                                                                                                                                                                                                                                                                                                                                                                 |
| <b>1. Antenatal care (ANC)</b>                                                                                                                                                                                                                                                                                                                              |        |                                                |                                                                                                                                                                                                                                                                                                                                                                                                                                                                                 |
| <b>Crude coverage:</b><br>Women with a recent live birth within 5-years prior to each survey wave and received at least 4 times ANC services from skilled providers                                                                                                                                                                                         | Binary | 0.No, < 4 visit(s)<br>1. Yes, ≥ 4 visits       | Q412: How many times did you receive antenatal care during this pregnancy?                                                                                                                                                                                                                                                                                                                                                                                                      |
| <b>Effective coverage:</b><br>Women with a recent live birth within 5-years prior to each survey wave and received at least 4 times ANC services and 5 key components of ANC from a health provider, which include: 1) blood pressure monitoring, 2) iron supplementation, 3) counsel about pregnancy complications, 4) urine testing, and 5) blood testing | Binary | 0.No<br>1. Yes, received all the four services | Q413: As part of your antenatal care during this pregnancy, were any of the following done at least once?<br>a) Was your blood pressure measured?<br>b) Did you give a blood sample?<br>c) Did you give a urine sample?<br><br>q421: During this pregnancy, were you given or did you buy any iron tablets or iron syrup?<br><br>Q414: During (any of) your antenatal care visit(s), were you told about things to look out for that might suggest problems with the pregnancy? |

| Indicators                                                                                                                                                                                                                               | Type   | Measurement                                                                                                                                                                                           | DHS measurement                                                                                                                                                                                                                                                |
|------------------------------------------------------------------------------------------------------------------------------------------------------------------------------------------------------------------------------------------|--------|-------------------------------------------------------------------------------------------------------------------------------------------------------------------------------------------------------|----------------------------------------------------------------------------------------------------------------------------------------------------------------------------------------------------------------------------------------------------------------|
| <b>2. Facility delivery</b>                                                                                                                                                                                                              |        |                                                                                                                                                                                                       |                                                                                                                                                                                                                                                                |
| <b>Crude coverage:</b><br>Women with a recent live birth within 5-years prior to each survey wave and delivered their last baby at the health facilities                                                                                 | Binary | 0.No<br>1. Yes, delivered at the facilities (excluding home and unspecified locations)<br><br>Skilled birth attendant includes general practitioner, obstetrician, nurse, midwife and village midwife | Q434: Where did you give birth to (NAME)?                                                                                                                                                                                                                      |
| <b>Effective coverage:</b><br>Women with a recent live birth within 5-years prior to each survey wave received postnatal care for their newborn before getting discharged                                                                | Binary | 0.No<br>1. Yes                                                                                                                                                                                        | Q436: After you gave birth to (NAME), did anyone check on your baby health while you were still in the facility?                                                                                                                                               |
| <b>3. Sick child - diarrhea</b>                                                                                                                                                                                                          |        |                                                                                                                                                                                                       |                                                                                                                                                                                                                                                                |
| <b>Crude coverage:</b><br>All children under 5 years reported to have had symptoms in the 2 weeks before the survey and seek treatment from health facility                                                                              | Binary | 0. No<br>1. Yes, from health facility (excluding pharmacies)                                                                                                                                          | Q611: Did you seek advice or treatment for the diarrhea from any source?<br>Q612: Where did you seek advice or treatment?                                                                                                                                      |
| <b>Effective coverage:</b><br>All children under 5 years reported to have had symptoms in the 2 weeks before the survey and seek treatment and received oral rehydration therapy (ORT)/increased fluids from health facility or provider | Binary | 0. No<br>1. Yes, received ORS / a pre-packaged / ORS/homemade fluid                                                                                                                                   | Q615: Was (NAME) given any of the following at any time since (NAME) started having the diarrhea:<br>a) A fluid made from a special packet called [LOCAL NAME FOR ORS PACKET]?<br>b) A pre-packaged ORS liquid?<br>c) A government-recommended homemade fluid? |
| <b>4. Sick child – pneumonia</b>                                                                                                                                                                                                         |        |                                                                                                                                                                                                       |                                                                                                                                                                                                                                                                |
| <b>Crude coverage:</b><br>All children under-5 years reported to have had symptoms in the 2 weeks before the survey and                                                                                                                  | Binary | 0. No<br>1. Yes, from facility (excluding pharmacies)                                                                                                                                                 | Q620. Where did you seek advice or treatment for pneumonia?<br>Q625. Where did you seek advice or treatment?                                                                                                                                                   |

| Indicators                                                                                                                                                                  | Type                | Measurement                                                                              | DHS measurement                                                                                                                                                                                                                                                                                                                                                                                                                          |
|-----------------------------------------------------------------------------------------------------------------------------------------------------------------------------|---------------------|------------------------------------------------------------------------------------------|------------------------------------------------------------------------------------------------------------------------------------------------------------------------------------------------------------------------------------------------------------------------------------------------------------------------------------------------------------------------------------------------------------------------------------------|
| were taken to a medical facility for treatment                                                                                                                              |                     |                                                                                          |                                                                                                                                                                                                                                                                                                                                                                                                                                          |
| <b>Effective coverage:</b><br>All children under-5 years reported to have had symptoms in the 2 weeks before the survey and received antibiotic pills, syrup, or injections | Binary              | 0. No<br>1. Yes, antibiotic drugs / PILL/SYRUP (J) INJECTION/IV (K)                      | Q630. What drugs did (NAME) take?                                                                                                                                                                                                                                                                                                                                                                                                        |
| <b>5. Sick child – fever</b>                                                                                                                                                |                     |                                                                                          |                                                                                                                                                                                                                                                                                                                                                                                                                                          |
| <b>Crude coverage:</b><br>All children under 5-years reported to have had symptoms in the 2 weeks before the survey and were taken to a medical facility for treatment      | Binary              | 0. No<br>1. Yes, from facility (excluding pharmacies)                                    | Q618. Has (NAME) been ill with a fever at any time in the last 2 weeks?<br>Q625. Where did you seek advice or treatment?                                                                                                                                                                                                                                                                                                                 |
| <b>Effective coverage:</b><br>All children under 5-years reported to have had symptoms in the 2 weeks and had blood taken from finger or heel for testing                   | Binary              | 0. No<br>1. Yes                                                                          | [no question available in the DHS survey but the data are available]                                                                                                                                                                                                                                                                                                                                                                     |
| <b>MEASURES OF SOCIOECONOMIC POSITION</b>                                                                                                                                   |                     |                                                                                          |                                                                                                                                                                                                                                                                                                                                                                                                                                          |
| Wealth index                                                                                                                                                                | Categorical ordinal | 0. Poorest / least wealthy<br>1. Poor<br>2. Middle<br>3. Rich<br>4. Richest / wealthiest | The wealth index is a composite measure of a household's cumulative living standard. The wealth index is calculated using easy-to-collect data on a household's ownership of selected assets, such as televisions and bicycles; materials used for housing construction; and types of water access and sanitation facilities. The wealth index is presented in the DHS Final Reports and survey datasets as a background characteristic. |
| Education                                                                                                                                                                   | Categorical ordinal | 0. Primary/lower<br>1. Secondary<br>2. Tertiary/higher                                   | Q107: Have you ever attended school?<br>Q108: What is the highest level of school you attended: primary, junior high, senior high, academy or university?                                                                                                                                                                                                                                                                                |

1  
2  
3  
4  
5  
6  
7  
8  
9  
10  
11  
12  
13  
14  
15  
16  
17  
18  
19  
20  
21  
22  
23  
24  
25  
26  
27  
28  
29  
30  
31  
32  
33  
34  
35  
36  
37  
38  
39  
40  
41  
42  
43  
44  
45  
46  
47

| <b>Indicators</b> | <b>Type</b> | <b>Measurement</b>   | <b>DHS measurement</b>                                              |
|-------------------|-------------|----------------------|---------------------------------------------------------------------|
|                   |             |                      | Q109: What is the highest (grade/year) you completed at that level? |
| Residency         | Binary      | 0. Rural<br>1. Urban | Q5: Urban/rural (identified by interviewers)                        |

For peer review only

**Supplemental table 2.** Crude and effective coverage of maternal and child health in Cambodia from 2000 to 2014.

| Survey, year             | 2000  |               | 2005  |               | 2010  |                | 2014  |               |
|--------------------------|-------|---------------|-------|---------------|-------|----------------|-------|---------------|
|                          | Mean  | (95% CI)      | Mean  | (95% CI)      | Mean  | (95% CI)       | Mean  | (95% CI)      |
| <b>Antenatal care</b>    |       |               |       |               |       |                |       |               |
| Crude coverage           | 8.9%  | (7.8 - 10.3)  | 27.0% | (24.7 - 29.5) | 59.4% | (57.0 - 61.7)  | 75.6% | (73.6 - 77.5) |
| Effective coverage       | 1.3%  | (1.0 - 1.9)   | 4.7%  | (3.7 - 6.0)   | 16.2% | (14.8 - 17.7)  | 32.8% | (30.8 - 34.9) |
| <b>Facility delivery</b> |       |               |       |               |       |                |       |               |
| Crude coverage           | 11.0% | (9.3 - 13.8)  | 23.2% | (20.5 - 26.1) | 56.8% | (54.1 - 59.4)  | 84.6% | (82.4 - 86.5) |
| Effective coverage       | --    | --            | 20.5% | (18.0 - 23.2) | 51.1% | (48.53 - 53.7) | 80.1% | (77.9 - 82.2) |
| <b>Diarrhea</b>          |       |               |       |               |       |                |       |               |
| Crude coverage           | 21.6% | (18.8 - 24.8) | 41.1% | (37.5 - 44.8) | 58.9% | (55.2 - 62.6)  | 55.5% | (50.9 - 60.0) |
| Effective coverage       | 7.8%  | (6.8 - 9.7)   | 21.1% | (18.3 - 24.1) | 27.7% | (24.3 - 31.3)  | 26.0% | (21.8 - 30.6) |
| <b>Pneumonia</b>         |       |               |       |               |       |                |       |               |
| Crude coverage           | 35.1% | (32.2 - 38.1) | 46.9% | (43.7 - 50.2) | 72.9% | (69.7 - 75.9)  | 61.3% | (57.4 - 65.0) |
| Effective coverage       | 30.4% | (27.7 - 33.2) | --    | --            | 37.3% | (34.0 - 40.8)  | 51.5% | (47.5 - 55.5) |
| <b>Fever</b>             |       |               |       |               |       |                |       |               |
| Crude coverage           | 34.1% | (31.4 - 36.9) | 47.8% | (44.6 - 51.1) | 75.5% | (72.6 - 78.1)  | 60.6% | (57.3 - 63.8) |
| Effective coverage       | --    | --            | 2.3%  | (1.7 - 3.1)   | 10.3% | (8.7 - 12.2)   | 11.5% | (9.5 - 13.9)  |

Note: -- Data are not available; effective coverage for facility delivery in 2000 and sick childcare for fever in 2000 and sick childcare for pneumonia in 2005.

1  
2  
3  
4  
5  
6  
7  
8  
9  
10  
11  
12  
13  
14  
15  
16  
17  
18  
19  
20  
21  
22  
23  
24  
25  
26  
27  
28  
29  
30  
31  
32  
33  
34  
35  
36  
37  
38  
39  
40  
41  
42  
43  
44  
45  
46  
47

**Supplemental table 3.** Crude and effective coverage of facility delivery (postnatal checkup after discharge) in Cambodia from 2005 to 2014

| Survey, year             | 2005  |               | 2010  |               | 2014  |               |
|--------------------------|-------|---------------|-------|---------------|-------|---------------|
|                          | Mean  | (95% CI)      | Mean  | (95% CI)      | Mean  | (95% CI)      |
| <b>Facility delivery</b> |       |               |       |               |       |               |
| Crude coverage           | 23.2% | (20.5 - 26.1) | 56.8% | (54.1 - 59.4) | 84.6% | (82.4 - 86.5) |
| Effective coverage       | 0.6%  | (0.4 - 0.9)   | 1.5%  | (1.1 - 2.0)   | 0.5%  | (0.3 - 0.8)   |

Note: Postnatal checkup after discharge is a question asked whether the mother was checked after getting discharge from the health facilities.

For peer review only





28  
29 **Supplemental figure 1.** Crude and effective coverage of facility delivery (postnatal checkup after discharge) in Cambodia from 2005  
30 to 2014.

31  
32 Note: Effective coverage for facility delivery was defined as the proportion of women who delivered at a health facility and who reported that someone examined  
33 them or asked questions about their health after being discharged.

Measuring effective coverage of maternal and child health services in Cambodia: a retrospective analysis of Demographic Health Surveys from 2005 to 2014

Min Kyung Kim, Soon Ae Kim, Juhwan Oh, Chae Eun Kim, Catherine Arsenault

bmjopen-2022-062028

**STROBE Statement—Checklist of items that should be included in reports of *cross-sectional studies***

|                           | <b>Item No</b> | <b>Recommendation</b>                                                                                                                                                                | <b>Page/line numbers where relevant information can be found</b> |
|---------------------------|----------------|--------------------------------------------------------------------------------------------------------------------------------------------------------------------------------------|------------------------------------------------------------------|
| <b>Title and abstract</b> | 1              | (a) Indicate the study's design with a commonly used term in the title or the abstract                                                                                               | Page 2, lines 30                                                 |
|                           |                | (b) Provide in the abstract an informative and balanced summary of what was done and what was found                                                                                  | Page 2, lines 42-48                                              |
| <b>Introduction</b>       |                |                                                                                                                                                                                      |                                                                  |
| Background/rationale      | 2              | Explain the scientific background and rationale for the investigation being reported                                                                                                 | Page 3, lines 62-92                                              |
| Objectives                | 3              | State specific objectives, including any prespecified hypotheses                                                                                                                     | Page 3, lines 93-96                                              |
| <b>Methods</b>            |                |                                                                                                                                                                                      |                                                                  |
| Study design              | 4              | Present key elements of study design early in the paper                                                                                                                              | Page 4, line 99                                                  |
| Setting                   | 5              | Describe the setting, locations, and relevant dates, including periods of recruitment, exposure, follow-up, and data collection                                                      | Page 4, lines 99-108                                             |
| Participants              | 6              | (a) Give the eligibility criteria, and the sources and methods of selection of participants                                                                                          | Page 4, lines 101-106                                            |
| Variables                 | 7              | Clearly define all outcomes, exposures, predictors, potential confounders, and effect modifiers. Give diagnostic criteria, if applicable                                             | Pages 4-5, lines 109-151                                         |
| Data sources/measurement  | 8*             | For each variable of interest, give sources of data and details of methods of assessment (measurement). Describe comparability of assessment methods if there is more than one group | Pages 4-5, lines 97-162                                          |
| Bias                      | 9              | Describe any efforts to address potential sources of bias                                                                                                                            | Page 4, lines 107-108                                            |
| Study size                | 10             | Explain how the study size was arrived at                                                                                                                                            |                                                                  |
| Quantitative variables    | 11             | Explain how quantitative variables were handled in the analyses. If applicable, describe which groupings were chosen and why                                                         | Page 4, lines 125-132                                            |
| Statistical methods       | 12             | (a) Describe all statistical methods, including those used to control for confounding                                                                                                | Pages 5-6, lines 163-181                                         |
|                           |                | (b) Describe any methods used to examine subgroups and interactions                                                                                                                  | N/A                                                              |
|                           |                | (c) Explain how missing data were addressed                                                                                                                                          | N/A                                                              |
|                           |                | (d) If applicable, describe analytical methods taking account of sampling strategy                                                                                                   | N/A                                                              |
|                           |                | (e) Describe any sensitivity analyses                                                                                                                                                | Pages 5-6, lines 169-                                            |

178

| <b>Results</b>           |     |                                                                                                                                                                                                              |                                            |
|--------------------------|-----|--------------------------------------------------------------------------------------------------------------------------------------------------------------------------------------------------------------|--------------------------------------------|
| Participants             | 13* | (a) Report numbers of individuals at each stage of study—eg numbers potentially eligible, examined for eligibility, confirmed eligible, included in the study, completing follow-up, and analysed            | Page 7, lines 186-195                      |
|                          |     | (b) Give reasons for non-participation at each stage                                                                                                                                                         | N/A                                        |
|                          |     | (c) Consider use of a flow diagram                                                                                                                                                                           | N/A                                        |
| Descriptive data         | 14* | (a) Give characteristics of study participants (eg demographic, clinical, social) and information on exposures and potential confounders                                                                     | Page 7, lines 186-153                      |
|                          |     | (b) Indicate number of participants with missing data for each variable of interest                                                                                                                          | N/A                                        |
| Outcome data             | 15* | Report numbers of outcome events or summary measures                                                                                                                                                         | Pages 7-8, lines 196-230                   |
| Main results             | 16  | (a) Give unadjusted estimates and, if applicable, confounder-adjusted estimates and their precision (eg, 95% confidence interval). Make clear which confounders were adjusted for and why they were included | Pages 7-8, lines 197-200, 205-208, 219-222 |
|                          |     | (b) Report category boundaries when continuous variables were categorized                                                                                                                                    | N/A                                        |
|                          |     | (c) If relevant, consider translating estimates of relative risk into absolute risk for a meaningful time period                                                                                             | N/A                                        |
| Other analyses           | 17  | Report other analyses done—eg analyses of subgroups and interactions, and sensitivity analyses                                                                                                               | Pages 7-8, lines 201-203, 209-217, 223-227 |
| <b>Discussion</b>        |     |                                                                                                                                                                                                              |                                            |
| Key results              | 18  | Summarise key results with reference to study objectives                                                                                                                                                     | Pages 9-10, lines 231-240                  |
| Limitations              | 19  | Discuss limitations of the study, taking into account sources of potential bias or imprecision. Discuss both direction and magnitude of any potential bias                                                   | Pages 11-12, lines 305-332                 |
| Interpretation           | 20  | Give a cautious overall interpretation of results considering objectives, limitations, multiplicity of analyses, results from similar studies, and other relevant evidence                                   | Pages 10-11, lines 241-304                 |
| Generalisability         | 21  | Discuss the generalisability (external validity) of the study results                                                                                                                                        | Page 12, line 332                          |
| <b>Other information</b> |     |                                                                                                                                                                                                              |                                            |
| Funding                  | 22  | Give the source of funding and the role of the funders for the present study and, if applicable, for the original study on which the present article is based                                                | Page 12, lines 347-349                     |

\*Give information separately for exposed and unexposed groups.

**Note:** An Explanation and Elaboration article discusses each checklist item and gives methodological background and published examples of transparent reporting. The STROBE checklist is best used in conjunction with this article (freely available on the Web sites of PLoS Medicine at <http://www.plosmedicine.org/>, Annals of Internal Medicine at

1  
2  
3  
4  
5  
6  
7  
8  
9  
10  
11  
12  
13  
14  
15  
16  
17  
18  
19  
20  
21  
22  
23  
24  
25  
26  
27  
28  
29  
30  
31  
32  
33  
34  
35  
36  
37  
38  
39  
40  
41  
42  
43  
44  
45  
46  
47  
48  
49  
50  
51  
52  
53  
54  
55  
56  
57  
58  
59  
60

<http://www.annals.org/>, and *Epidemiology* at <http://www.epidem.com/>). Information on the STROBE Initiative is available at [www.strobe-statement.org](http://www.strobe-statement.org).

For peer review only
