# Supplementary material for: Measuring effective coverage of maternal and child health services in Cambodia: a retrospective analysis of Demographic and Health Surveys from 2005 to 2014
Source: HighWire-hosted journal article supplement (doi:10.1136/bmjopen-2022-062028), 2022-09-01
Supplement: bmjopen-2022-062028supp001_data_supplement.pdf [file bmjopen-2022-062028supp001_data_supplement.pdf]

## Supplementary file – second round

### Measuring effective coverage of maternal and child health services in Cambodia: a retrospective analysis of Demographic and Health Surveys from 2005 to 2014

Min Kyung Kim, Soon Ae Kim, Ju Hwan Oh, Chae Eun Kim, Catherine Arsenault

**Supplemental table 1.** Indicator definitions and measurement strategy for crude coverage, effective coverage, and inequality, Cambodia Demographic Health Surveys

| Indicators                                                                                                                                                                                                                                                                                                                                                  | Type   | Measurement                                    | DHS measurement                                                                                                                                                                                                                                                                                                                                                                                                                                                                 |
|-------------------------------------------------------------------------------------------------------------------------------------------------------------------------------------------------------------------------------------------------------------------------------------------------------------------------------------------------------------|--------|------------------------------------------------|---------------------------------------------------------------------------------------------------------------------------------------------------------------------------------------------------------------------------------------------------------------------------------------------------------------------------------------------------------------------------------------------------------------------------------------------------------------------------------|
| <b>OUTCOME VARIABLES</b>                                                                                                                                                                                                                                                                                                                                    |        |                                                |                                                                                                                                                                                                                                                                                                                                                                                                                                                                                 |
| <b>1. Antenatal care (ANC)</b>                                                                                                                                                                                                                                                                                                                              |        |                                                |                                                                                                                                                                                                                                                                                                                                                                                                                                                                                 |
| <b>Crude coverage:</b><br>Women with a recent live birth within 5-years prior to each survey wave and received at least 4 times ANC services from skilled providers                                                                                                                                                                                         | Binary | 0.No, < 4 visit(s)<br>1. Yes, ≥ 4 visits       | Q412: How many times did you receive antenatal care during this pregnancy?                                                                                                                                                                                                                                                                                                                                                                                                      |
| <b>Effective coverage:</b><br>Women with a recent live birth within 5-years prior to each survey wave and received at least 4 times ANC services and 5 key components of ANC from a health provider, which include: 1) blood pressure monitoring, 2) iron supplementation, 3) counsel about pregnancy complications, 4) urine testing, and 5) blood testing | Binary | 0.No<br>1. Yes, received all the four services | Q413: As part of your antenatal care during this pregnancy, were any of the following done at least once?<br>a) Was your blood pressure measured?<br>b) Did you give a blood sample?<br>c) Did you give a urine sample?<br><br>q421: During this pregnancy, were you given or did you buy any iron tablets or iron syrup?<br><br>Q414: During (any of) your antenatal care visit(s), were you told about things to look out for that might suggest problems with the pregnancy? |

| Indicators                                                                                                                                                                                                                               | Type   | Measurement                                                                                                                                                                                            | DHS measurement                                                                                                                                                                                                                                                |
|------------------------------------------------------------------------------------------------------------------------------------------------------------------------------------------------------------------------------------------|--------|--------------------------------------------------------------------------------------------------------------------------------------------------------------------------------------------------------|----------------------------------------------------------------------------------------------------------------------------------------------------------------------------------------------------------------------------------------------------------------|
| <b>2. Facility delivery</b>                                                                                                                                                                                                              |        |                                                                                                                                                                                                        |                                                                                                                                                                                                                                                                |
| <b>Crude coverage:</b><br>Women with a recent live birth within 5-years prior to each survey wave and delivered their last baby at the health facilities                                                                                 | Binary | 0. No<br>1. Yes, delivered at the facilities (excluding home and unspecified locations)<br><br>Skilled birth attendant includes general practitioner, obstetrician, nurse, midwife and village midwife | Q434: Where did you give birth to (NAME)?                                                                                                                                                                                                                      |
| <b>Effective coverage:</b><br>Women with a recent live birth within 5-years prior to each survey wave received postnatal care for their newborn before getting discharged                                                                | Binary | 0. No<br>1. Yes                                                                                                                                                                                        | Q436: After you gave birth to (NAME), did anyone check on your baby health while you were still in the facility?                                                                                                                                               |
| <b>3. Sick child - diarrhea</b>                                                                                                                                                                                                          |        |                                                                                                                                                                                                        |                                                                                                                                                                                                                                                                |
| <b>Crude coverage:</b><br>All children under 5 years reported to have had symptoms in the 2 weeks before the survey and seek treatment from health facility                                                                              | Binary | 0. No<br>1. Yes, from health facility (excluding pharmacies)                                                                                                                                           | Q611: Did you seek advice or treatment for the diarrhea from any source?<br>Q612: Where did you seek advice or treatment?                                                                                                                                      |
| <b>Effective coverage:</b><br>All children under 5 years reported to have had symptoms in the 2 weeks before the survey and seek treatment and received oral rehydration therapy (ORT)/increased fluids from health facility or provider | Binary | 0. No<br>1. Yes, received ORS / a pre-packaged / ORS/homemade fluid                                                                                                                                    | Q615: Was (NAME) given any of the following at any time since (NAME) started having the diarrhea:<br>a) A fluid made from a special packet called [LOCAL NAME FOR ORS PACKET]?<br>b) A pre-packaged ORS liquid?<br>c) A government-recommended homemade fluid? |
| <b>4. Sick child – pneumonia</b>                                                                                                                                                                                                         |        |                                                                                                                                                                                                        |                                                                                                                                                                                                                                                                |
| <b>Crude coverage:</b><br>All children under-5 years reported to have had symptoms in the 2 weeks before the survey and                                                                                                                  | Binary | 0. No<br>1. Yes, from facility (excluding pharmacies)                                                                                                                                                  | Q620. Where did you seek advice or treatment for pneumonia?<br>Q625. Where did you seek advice or treatment?                                                                                                                                                   |

| Indicators                                                                                                                                                                                                                                                                                                                                       | Type                | Measurement                                                                                                     | DHS measurement                                                                                                                                                                                                                                                                                                                                                                                                                                        |
|--------------------------------------------------------------------------------------------------------------------------------------------------------------------------------------------------------------------------------------------------------------------------------------------------------------------------------------------------|---------------------|-----------------------------------------------------------------------------------------------------------------|--------------------------------------------------------------------------------------------------------------------------------------------------------------------------------------------------------------------------------------------------------------------------------------------------------------------------------------------------------------------------------------------------------------------------------------------------------|
| <p>were taken to a medical facility for treatment</p> <p><b>Effective coverage:</b><br/>All children under-5 years reported to have had symptoms in the 2 weeks before the survey and received antibiotic pills, syrup, or injections</p>                                                                                                        | Binary              | <p>0. No</p> <p>1. Yes, antibiotic drugs / PILL/SYRUP (J) INJECTION/IV (K)</p>                                  | Q630. What drugs did (NAME) take?                                                                                                                                                                                                                                                                                                                                                                                                                      |
| <b>5. Sick child – fever</b>                                                                                                                                                                                                                                                                                                                     |                     |                                                                                                                 |                                                                                                                                                                                                                                                                                                                                                                                                                                                        |
| <p><b>Crude coverage:</b><br/>All children under 5-years reported to have had symptoms in the 2 weeks before the survey and were taken to a medical facility for treatment</p> <p><b>Effective coverage:</b><br/>All children under 5-years reported to have had symptoms in the 2 weeks and had blood taken from finger or heel for testing</p> | Binary              | <p>0. No</p> <p>1. Yes, from facility (excluding pharmacies)</p>                                                | <p>Q618. Has (NAME) been ill with a fever at any time in the last 2 weeks?</p> <p>Q625. Where did you seek advice or treatment?</p>                                                                                                                                                                                                                                                                                                                    |
|                                                                                                                                                                                                                                                                                                                                                  | Binary              | <p>0. No</p> <p>1. Yes</p>                                                                                      | [no question available in the DHS survey but the data are available]                                                                                                                                                                                                                                                                                                                                                                                   |
| <b>MEASURES OF SOCIOECONOMIC POSITION</b>                                                                                                                                                                                                                                                                                                        |                     |                                                                                                                 |                                                                                                                                                                                                                                                                                                                                                                                                                                                        |
| Wealth index                                                                                                                                                                                                                                                                                                                                     | Categorical ordinal | <p>0. Poorest / least wealthy</p> <p>1. Poor</p> <p>2. Middle</p> <p>3. Rich</p> <p>4. Richest / wealthiest</p> | <p>The wealth index is a composite measure of a household's cumulative living standard.</p> <p>The wealth index is calculated using easy-to-collect data on a household's ownership of selected assets, such as televisions and bicycles; materials used for housing construction; and types of water access and sanitation facilities. The wealth index is presented in the DHS Final Reports and survey datasets as a background characteristic.</p> |
| Education                                                                                                                                                                                                                                                                                                                                        | Categorical ordinal | <p>0. Primary/lower</p> <p>1. Secondary</p> <p>2. Tertiary/higher</p>                                           | <p>Q107: Have you ever attended school?</p> <p>Q108: What is the highest level of school you attended: primary, junior high, senior high, academy or university?</p>                                                                                                                                                                                                                                                                                   |

| <b>Indicators</b> | <b>Type</b> | <b>Measurement</b>   | <b>DHS measurement</b>                                                                                              |
|-------------------|-------------|----------------------|---------------------------------------------------------------------------------------------------------------------|
| Residency         | Binary      | 0. Rural<br>1. Urban | Q109: What is the highest (grade/year) you completed at that level?<br>Q5: Urban/rural (identified by interviewers) |

**Supplemental table 2.** Crude and effective coverage of maternal and child health in Cambodia from 2000 to 2014.

| Survey, year             | 2000  |               | 2005  |               | 2010  |                | 2014  |               |
|--------------------------|-------|---------------|-------|---------------|-------|----------------|-------|---------------|
|                          | Mean  | (95% CI)      | Mean  | (95% CI)      | Mean  | (95% CI)       | Mean  | (95% CI)      |
| <b>Antenatal care</b>    |       |               |       |               |       |                |       |               |
| Crude coverage           | 8.9%  | (7.8 - 10.3)  | 27.0% | (24.7 - 29.5) | 59.4% | (57.0 - 61.7)  | 75.6% | (73.6 - 77.5) |
| Effective coverage       | 1.3%  | (1.0 - 1.9)   | 4.7%  | (3.7 - 6.0)   | 16.2% | (14.8 - 17.7)  | 32.8% | (30.8 - 34.9) |
| <b>Facility delivery</b> |       |               |       |               |       |                |       |               |
| Crude coverage           | 11.0% | (9.3 - 13.8)  | 23.2% | (20.5 - 26.1) | 56.8% | (54.1 - 59.4)  | 84.6% | (82.4 - 86.5) |
| Effective coverage       | --    | --            | 20.5% | (18.0 - 23.2) | 51.1% | (48.53 - 53.7) | 80.1% | (77.9 - 82.2) |
| <b>Diarrhea</b>          |       |               |       |               |       |                |       |               |
| Crude coverage           | 21.6% | (18.8 - 24.8) | 41.1% | (37.5 - 44.8) | 58.9% | (55.2 - 62.6)  | 55.5% | (50.9 - 60.0) |
| Effective coverage       | 7.8%  | (6.8 - 9.7)   | 21.1% | (18.3 - 24.1) | 27.7% | (24.3 - 31.3)  | 26.0% | (21.8 - 30.6) |
| <b>Pneumonia</b>         |       |               |       |               |       |                |       |               |
| Crude coverage           | 35.1% | (32.2 - 38.1) | 46.9% | (43.7 - 50.2) | 72.9% | (69.7 - 75.9)  | 61.3% | (57.4 - 65.0) |
| Effective coverage       | 30.4% | (27.7 - 33.2) | --    | --            | 37.3% | (34.0 - 40.8)  | 51.5% | (47.5 - 55.5) |
| <b>Fever</b>             |       |               |       |               |       |                |       |               |
| Crude coverage           | 34.1% | (31.4 - 36.9) | 47.8% | (44.6 - 51.1) | 75.5% | (72.6 - 78.1)  | 60.6% | (57.3 - 63.8) |
| Effective coverage       | --    | --            | 2.3%  | (1.7 - 3.1)   | 10.3% | (8.7 - 12.2)   | 11.5% | (9.5 - 13.9)  |

Note: -- Data are not available; effective coverage for facility delivery in 2000 and sick childcare for fever in 2000 and sick childcare for pneumonia in 2005.

**Supplemental table 3.** Crude and effective coverage of facility delivery (postnatal checkup after discharge) in Cambodia from 2005 to 2014

| Survey, year             | 2005  |               | 2010  |               | 2014  |               |
|--------------------------|-------|---------------|-------|---------------|-------|---------------|
|                          | Mean  | (95% CI)      | Mean  | (95% CI)      | Mean  | (95% CI)      |
| <b>Facility delivery</b> |       |               |       |               |       |               |
| Crude coverage           | 23.2% | (20.5 - 26.1) | 56.8% | (54.1 - 59.4) | 84.6% | (82.4 - 86.5) |
| Effective coverage       | 0.6%  | (0.4 - 0.9)   | 1.5%  | (1.1 - 2.0)   | 0.5%  | (0.3 - 0.8)   |

Note: Postnatal checkup after discharge is a question asked whether the mother was checked after getting discharge from the health facilities.

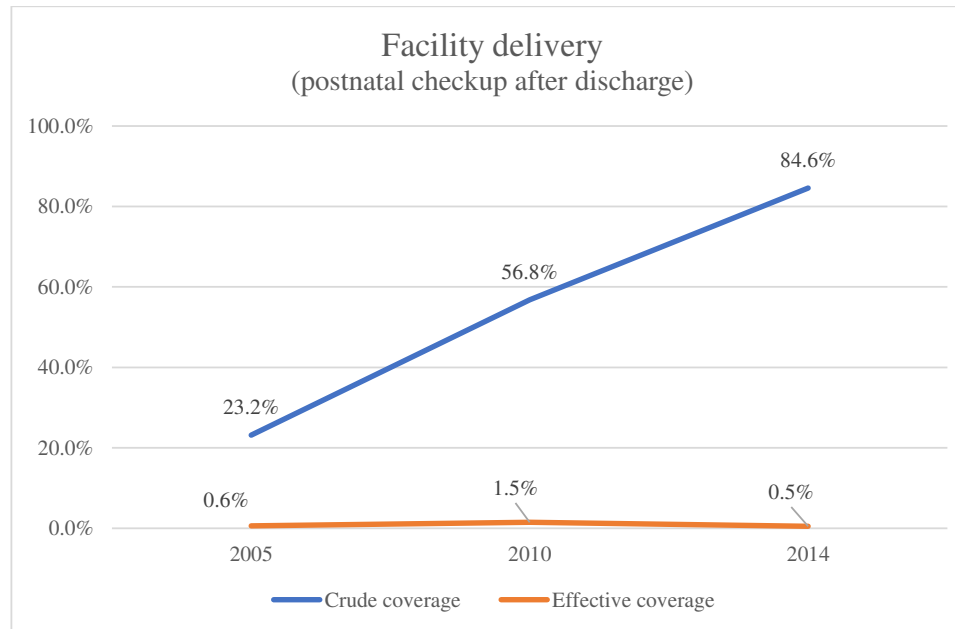

**Supplemental figure 1.** Crude and effective coverage of facility delivery (postnatal checkup after discharge) in Cambodia from 2005 to 2014.

Note: Effective coverage for facility delivery was defined as the proportion of women who delivered at a health facility and who reported that someone examined them or asked questions about their health after being discharged.
